# Supplementary material for: High-yielding synthesis of cyclometallated iridium complexes with hydrogen bond-rich ligands
Source: Royal Society of Chemistry journal article supplement (doi:10.1039/d3cc02296j), 2023-01-01
Supplement: d3cc02296j1.pdf [file d3cc02296j1.pdf]

## Supplementary Information

### **High-Yielding Synthesis of Cyclometallated Iridium Complexes with Hydrogen Bond-Rich Ligands**

Marta Tomás Piqueras, Holly J. Howe, Sarah A. Englehart, Robert M. Williamson,  
Allyson M. Paul, and Barry A. Blight\*

University of New Brunswick, Department of Chemistry, Fredericton, New Brunswick, Canada,  
E3B 5A3

#### **Table of Contents**

|                                                                                                   |       |
|---------------------------------------------------------------------------------------------------|-------|
| S0: Materials and Techniques                                                                      | II    |
| SI: Synthesis of Ir(PPy) <sub>2</sub> (N <sup>^</sup> S) <b>4</b> using Alternative Methodologies | IX    |
| SII: Synthetic Procedures and Characterization Data                                               | XI    |
| SIII: <sup>1</sup> H and <sup>13</sup> C NMR Spectra, Mass Spectra and Elemental Analysis         | XXX   |
| SIV: UV-Vis, Excitation and Emission Data                                                         | LX    |
| SV: PLQYs and Decay Lifetimes                                                                     | LXIII |

## S0. Materials and Techniques

**Materials.** All starting materials were purchased from commercial sources (Sigma Aldrich, Fisher Scientific and TCI) and used without further purification. Analytical thin layer chromatography (TLC) was carried out on precoated TLC plates Alugram Sil G/UV254. Column chromatography purifications were done with silica gel (ultrapure, 60-200  $\mu\text{m}$  (60 Å)). Experiments were performed as follows:

(i) A conventional hotplate (IKA™ RCT Basic magnetic hot plate stirrer (Stirring range: 50 to 1500 rpm; Size: 5.3 in. dia; Supplier: IKA™ 3810001) - fumehood), under a dry  $\text{N}_2$  atmosphere using standard Schlenk Line techniques when specified.

(ii) Microwave reactor – Anton Paar-Monowave 400 (max. temp. 300°C, power 850 W and pressure of 30 bar) with 10- and 30-mL borosilicate glass vials with a cap material of PEEK. The seal material is made from Teflon-coated silicone. Supplier: Anton Paar.

(iii) Mixer Mill MM 400 (RETSCH). Vibrational frequency up to 30 Hz and grinding time up to 99 min. Equipped with 2 grinding stations. Grinding jars with a nominal volume of the screw-top between 5-25 mL and two grinding balls made of stainless steel were used. Supplier: RETSCH.

**Nuclear Magnetic Resonance (NMR).**  $^1\text{H}$  (400 MHz) and  $^{13}\text{C}$  (201 MHz) NMR spectra were recorded on an Agilent 400 MR and a Bruker Avance III HD 800 MHz spectrometers in deuterated solvents, namely chloroform-*d* ( $\text{CDCl}_3$ ) and dimethyl sulfoxide-*d*<sub>6</sub> ( $\text{DMSO-}d_6$ ), which were purchased from Fisher Scientific. All chemical shifts are reported in  $\delta$  (ppm) referenced to tetramethylsilane ( $\text{Si}(\text{CH}_3)_4$ ) and the peak multiplicities are referred

to as singlet (s), doublet (d), triplet(t), quartet (q), multiplet (m). Spin-spin coupling effect is quantified with the coupling constants, which is abbreviated with the capital letter J.

**Mass Spectrometry.** High-resolution mass spectral data measurements were performed by Xiao Feng at the Mass Spectrometry Laboratory (Dalhousie University, Halifax, Canada). High-resolution mass spectra were recorded on Bruker Daltonics MicrOTOF instrument. The ionization method used for low/high-resolution analysis was positive electrospray ionization (ESI+). The sample was introduced by a syringe pump at a flow rate of 2  $\mu$ L/min and the spray voltage applied to the ESI needle was 4.5 kV. The dry gas flow rate was 4 L/min with a pressure of 1 Bar and a temperature of 180°C. For the analysis, samples sizes were between 1.0-2.5 mg and the experiment was replicated 2-3 times to ensure the viability of the results (sample sizes of 5-7 mg were sent).

**Elemental Analysis.** Elemental analysis was performed by Patricia Granados at the Centre for Environmental Analysis and Remediation (Saint Mary's University, Halifax, Canada). Carbon, hydrogen, and nitrogen analyses were conducted on a PerKin Elmer 2400 Series II CHN Analyser. CHN results were processed as a percentage by weight of each element and were measured as a function of thermal conductivity. For the analysis, samples sizes were between 2.5-3.5 mg and the experiment was replicated 2-3 times to ensure the viability of the results (sample sizes of 15-20 mg were sent).

**UV-Vis Spectroscopy.** UV-Vis spectra for the cyclometalated Ir(III) complexes **5-11** were recorded with a Cary Series UV-Vis Spectrophotometer (Agilent Technologies). Chloroform – HPLC grade (C606-1, LOT 214513) was used as the blank solution and the solvent to prepare the solutions of the several Ir(III) complexes **5-11**. Two standard Q macro cuvettes with an optical path length of 10 millimetres which are made of fused quartz glass were used to measure the absorbance of these compounds. UV-Vis spectra were collected with a concentration of the cyclometalated Ir(III) complexes **5-11** of  $1.1 \cdot 10^{-5} - 2.8 \cdot 10^{-6}$  M (**Table S1**).

**Table S1.** Ir(III) complexes' concentrations.

| Compound  | Concentration (M <sup>-1</sup> ) |
|-----------|----------------------------------|
| <b>5</b>  | $9.5 \cdot 10^{-6}$              |
| <b>6</b>  | $1.1 \cdot 10^{-5}$              |
| <b>7</b>  | $2.8 \cdot 10^{-6}$              |
| <b>8</b>  | $9.3 \cdot 10^{-6}$              |
| <b>9</b>  | $9.4 \cdot 10^{-6}$              |
| <b>10</b> | $9.0 \cdot 10^{-6}$              |
| <b>11</b> | $7.2 \cdot 10^{-6}$              |

**Photoluminescence Emission Spectroscopy.** Emission and excitation spectra, PLQY, and decay lifetime measurements were recorded with a FS5 Spectrofluorometer (Edinburgh Instruments).

- Excitation and emission spectra for the cyclometalated Ir(III) complexes **5-11** were recorded with a FS5 Spectrofluorometer (Edinburgh Instruments) and a SC-05 (Standard Cuvette Holder) at 298 K. A Hellma Fluorescence Cuvette (Suprasil 6 Quartz, spectral range 200-2,500 nm, pathlength 10x4 mm and chamber volume 3,500  $\mu$ L) was used to measure the excitation and emission spectra of **5-11**. The sample solutions were prepared in chloroform – HPLC grade (C606-1, LOT 214513), which was used as a blank solution and the solvent to prepare the solutions of **5-11** (concentration of  $1.1 \cdot 10^{-5}$  –  $2.8 \cdot 10^{-6}$  M (**Table S1**)). All solutions were degassed in the cuvette for one minute ( $N_2$ ) before each measurement.

- Photoluminescence quantum yields were calculated using the relative method. A solution of quinine sulphate in 0.1 M sulfuric acid was used as a reference sample and Ir(III) compounds **5-11** were measured at a concentration depicted in **Table S2**. Absorbance spectra were recorded in triplicate for both the reference and Ir(III) complexes **5-11** at a fixed absorbance value below 0.1, ranging from 0.075 to 0.080. All solutions were degassed in the cuvette for 20 minutes (Ar) before each measurement. (absorbance value recommended by Edinburgh Instruments). An average of these absorbances was used as the standard value for both the reference and the Ir(III) complexes **5-11**. Emission spectra were then recorded in triplicate for both the reference

and Ir(III) complexes **5-11** with all samples being excited at 350 nm. The area under the curve of the emission scan was then calculated. An average of these integration values was used as the standard value for both the reference and the Ir(III) complexes **5-11**. Photoluminescence quantum yields for each Ir(III) complex **5-11** were then calculated using **eq. 1**, and the values reported in **Table S5**.

**Equation 1:**

$$QY \text{ of Ir(III) complexes} = QY_{ref} \times \frac{I_{sample}}{I_{ref}} \times \frac{A_{ref}}{A_{sample}} \times \frac{\eta_{sample}^2}{\eta_{ref}^2}$$

*I* = Integrated area under the emission curve

*A* = Absorbance at the wavelength of excitation maxima

*η* = Refractive index

Citation: Brouwer, A. M. (2011). Standards for photoluminescence quantum yield measurements in solution (IUPAC technical report). *Pure and Applied Chemistry*, 83(12), 2213–2228

**Table S2.** Quinine sulphate and Ir(III) complexes' concentrations.

| <b>Compound</b> | <b>Concentration (M<sup>-1</sup>)</b> |
|-----------------|---------------------------------------|
| <b>5</b>        | 9.5•10 <sup>-6</sup>                  |
| <b>6</b>        | 1.1•10 <sup>-5</sup>                  |
| <b>7</b>        | 2.8•10 <sup>-6</sup>                  |
| <b>8</b>        | 9.3•10 <sup>-6</sup>                  |
| <b>9</b>        | 9.4•10 <sup>-6</sup>                  |
| <b>10</b>       | 9.0•10 <sup>-6</sup>                  |
| <b>11</b>       | 7.2•10 <sup>-6</sup>                  |
| <b>QS</b>       | 1.25•10 <sup>-5</sup>                 |

- Decay lifetime measurements were recorded with a FS5 Spectrofluorometer (Edinburgh Instruments) and a SC-05 (Standard Cuvette Holder). All solutions of **5-11** were prepared to a concentration of  $\sim 1 \cdot 10^{-6}$  M using chloroform – HPLC grade (C606-1, LOT 214513) that was degassed in a cuvette for 20 minutes (Ar) before each measurement at 298 K. A QF2001 – 10 mm Lightpath Spectrophotometer Screw Cap Cuvette (Threaded – Quartz 3.5 mL) was used to measure the excitation spectra of each Ir(III) complexes (**5-11**). The excited state lifetimes were measured by the time correlated single photon counting spectra (TCSPC) technique using an EPLED-365 (Edinburgh Instruments) laser with

emission detection at 520 nm for all complexes. Each lifetime measurement was calculated through an Exponential Fit Time Scan that follows the formula:

$$\text{Fit: } B_1 e^{(-t/\tau_1)} + B_2 e^{(-t/\tau_2)} + B_3 e^{(-t/\tau_3)} + B_4 e^{(-t/\tau_4)}$$

A chi-squared ( $\chi^2$ ) of values between 1-1.3 were found suitable. These complexes showed either monoexponential decay or biexponential decay.



### S1: Synthesis of Ir(PPy)<sub>2</sub>(N<sup>^</sup>S) **4** using alternative methodologies

The synthesis of Ir(PPy)<sub>2</sub>(N<sup>^</sup>S) **4** (Scheme 2) was also explored using two other methodologies. **Table S3** and **S4** outlines microwave (Anton Paar-monowave 400) and mechanochemistry-based (RETSCH MM 400 Mixer Mill) approaches towards **4**, respectively.

**Table S3.** Optimizing the synthesis of **4** with an Anton Par-Monowave 400 reactor.

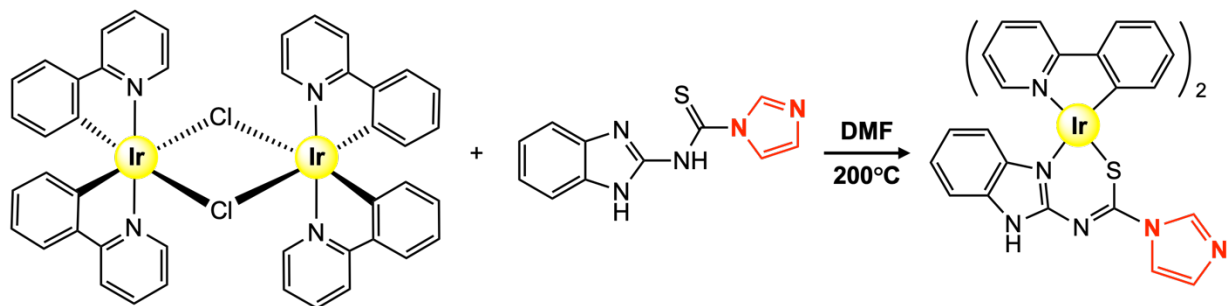

| Entry | Ir dimer (mg) | Base                            | Time (min) | Yield (%) |
|-------|---------------|---------------------------------|------------|-----------|
| 1     | 50            | K <sub>2</sub> CO <sub>3</sub>  | 40         | 43        |
| 2     | 50            | Cs <sub>2</sub> CO <sub>3</sub> | 40         | 40        |
| 3     | 50            | Na <sub>2</sub> CO <sub>3</sub> | 40         | 34        |
| 4     | 50            | NaHCO <sub>3</sub>              | 40         | 27        |
| 5     | 100           | Cs <sub>2</sub> CO <sub>3</sub> | 60         | 58        |
| 6     | 100           | K <sub>2</sub> CO <sub>3</sub>  | 60         | 62        |

**Table S4.** Optimizing the formation of compound **4** using a RETSCH Mixer Mill MM 400.

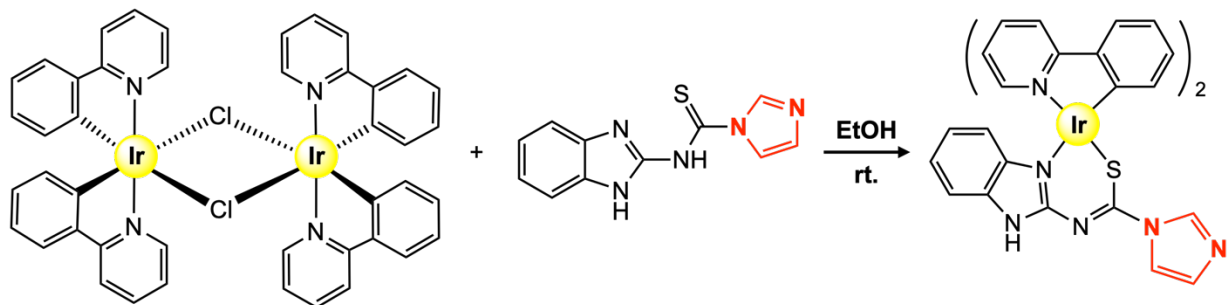

| Entry | Ir dimer (mg) | Base                     | Time (min) | Yield (%) |
|-------|---------------|--------------------------|------------|-----------|
| 1     | 30            | $\text{K}_2\text{CO}_3$  | 40         | 31        |
| 2     | 30            | $\text{Cs}_2\text{CO}_3$ | 40         | 33        |
| 3     | 30            | $\text{Na}_2\text{CO}_3$ | 40         | 27        |
| 4     | 100           | $\text{K}_2\text{CO}_3$  | 40         | 44        |
| 5     | 100           | $\text{Cs}_2\text{CO}_3$ | 40         | 24        |
| 6     | 150           | $\text{K}_2\text{CO}_3$  | 60         | 83        |
| 7     | 150           | $\text{Cs}_2\text{CO}_3$ | 60         | 47        |
| 8     | 50            | $\text{K}_2\text{CO}_3$  | 90         | 54        |
| 9     | 50            | $\text{Cs}_2\text{CO}_3$ | 90         | 47        |

## SII: Synthetic Procedures and Characterization Data

Synthesis of Cyclometalated Ir(III) dimer **[Ir(ppy)<sub>2</sub>Cl]<sub>2</sub>**:

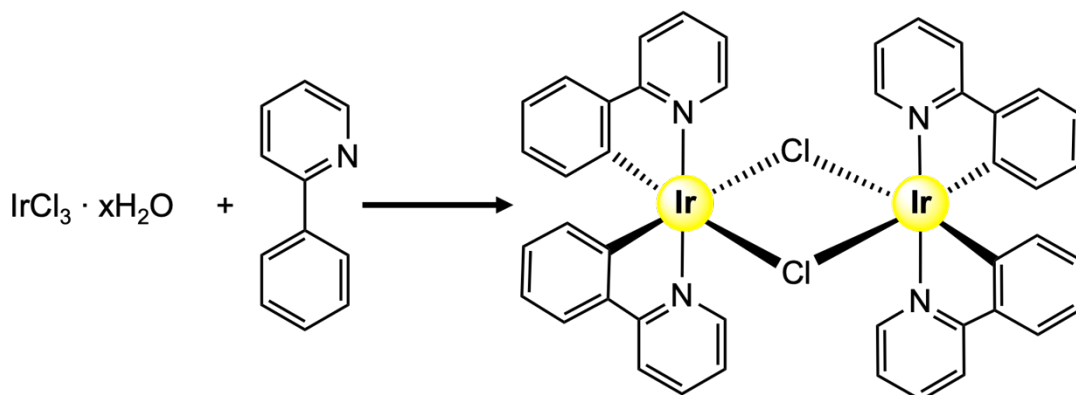

A mixture of iridium(III) chloride trihydrate (0.4 g, 1.13 mmol, 1.0 eq) and 2-phenylpyridine (0.34 mL, 2.38 mmol, 2.1 eq) was dissolved in 2-ethoxyethanol/water (3:1) mixture (30 mL). The reaction was refluxed under  $\text{N}_2$  and stirred for 24 hours. The crude mixture was slowly cooled to room temperature and filtered to afford **[Ir(ppy)<sub>2</sub>Cl]<sub>2</sub>** (0.46 g, 76%) as a yellow solid. The characterization matches that reported in literature.<sup>18</sup>

<sup>1</sup>H NMR (400 MHz,  $\text{CDCl}_3$ )  $\delta$  9.28 – 9.19 (m, 1H), 7.87 (d,  $J = 7.8$  Hz, 1H), 7.80 – 7.68 (m, 1H), 7.48 (d,  $J = 7.4$  Hz, 1H), 6.84 – 6.68 (m, 2H), 6.56 (ddd,  $J = 7.8, 1.2, 0.7$  Hz, 1H), 5.93 (d,  $J = 7.8$  Hz, 1H).

<sup>13</sup>C NMR (101 MHz,  $\text{CDCl}_3$ )  $\delta$  168.69, 151.84, 145.48, 143.84, 136.28, 130.72, 129.23, 123.78, 122.24, 121.45, 118.52.

Synthesis of *N*-(benzoimidazol-2-yl)imidazole-1-carbothioamide (**3**):

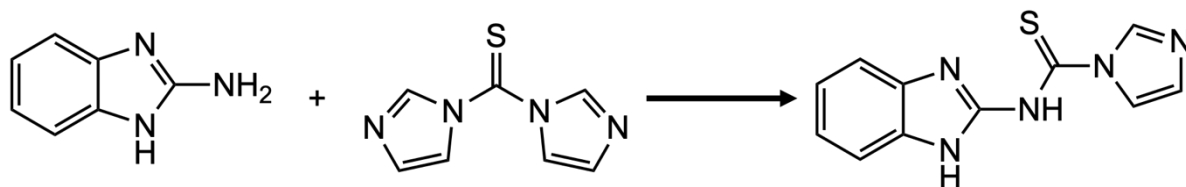

A mixture of 2-aminobenzimidazole (2.00 g, 15 mmol, 1.0 eq) and thiocarbonyldiimidazole (3.48 g, 19.5 mmol, 1.3 eq) was dissolved in acetonitrile (30 mL) and heated to 50°C. Then, the reaction was stirred at this temperature for 18 hours. The crude mixture was slowly cooled to room temperature and filtered to afford **3** (3.65 g, 63%) as a pale orange solid. The characterization matches that reported in literature.<sup>18</sup>

<sup>1</sup>H NMR (400 MHz, DMSO-*d*<sub>6</sub>): δ 13.26 (s, 2H), 8.55 (s, 1H), 7.93 (s, 1H), 7.61 (dd, *J* = 5.9, 3.1 Hz, 2H), 7.34 (dd, *J* = 5.9, 3.1 Hz, 2H), 7.00 (s, 1H).

<sup>13</sup>C NMR (101 MHz, DMSO-*d*<sub>6</sub>): δ 178.87, 152.17, 135.98, 129.30, 128.84, 123.87, 117.81, 112.49.

Iridium(III) primer complex (**4**):

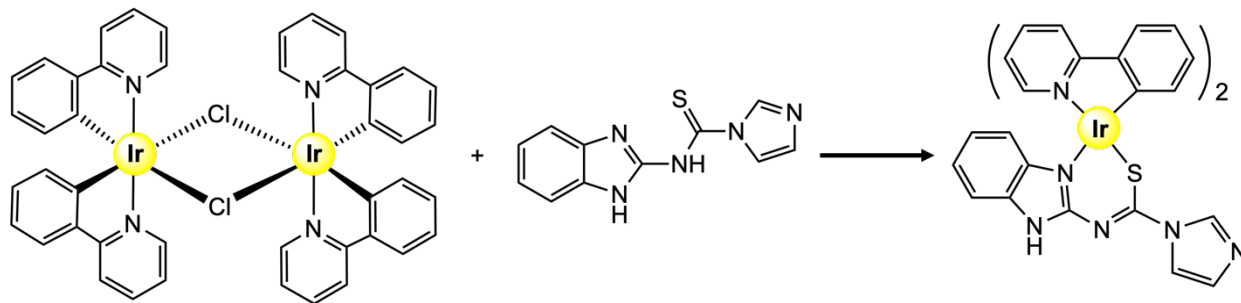

A mixture of iridium complex  $[\text{Ir}(\text{ppy})_2\text{Cl}]_2$  (0.1 g, 0.093 mmol, 1.0 eq), *N*-(benzoimidazol-2-yl)imidazole-1-carbothioamide (**3**) (0.047 g, 0.20 mmol, 2.1 eq) and  $\text{K}_2\text{CO}_3$  (0.13 g, 0.93 mmol, 10 eq) was dissolved in toluene (10 mL). The reaction was heated to  $110^\circ\text{C}$  and stirred for 24 hours. Then, the reaction was slowly cooled down to room temperature. The mixture was quenched with water (20 mL) and diluted with EtOAc (15 mL). The aqueous phase was washed further with EtOAc (2 x 15 mL), before the organic phases were combined, dried over with anhydrous  $\text{MgSO}_4$ , filtered and concentrated *in vacuo*. The crude product was purified by flash column chromatography on silica eluting with EtOAc to afford **4** (0.082 g, 75%) as a yellow solid.

$^1\text{H}$  NMR (400 MHz,  $\text{DMSO}-d_6$ )  $\delta$  12.53 (s, 1H), 9.35 – 9.29 (m, 1H), 8.48 – 8.44 (m, 1H), 8.22 (d,  $J = 8.3$  Hz, 1H), 8.15 – 8.10 (m, 1H), 8.08 (d,  $J = 8.3$  Hz, 1H), 7.95 – 7.88 (m, 1H), 7.87 – 7.74 (m, 4H), 7.29 (ddd,  $J = 13.1, 9.5, 4.6$  Hz, 2H), 7.23 – 7.16 (m, 1H), 7.01 – 6.89 (m, 3H), 6.87 – 6.79 (m, 2H), 6.68 (td,  $J = 7.4, 1.2$  Hz, 1H), 6.57 – 6.49 (m, 1H), 6.28 – 6.22 (m, 2H), 6.10 - 6.05 (m, 1H).

$^{13}\text{C}$  NMR (101 MHz,  $\text{DMSO}-d_6$ )  $\delta$  167.90, 167.14, 161.38, 156.66, 150.09, 149.75, 149.30, 148.10, 144.19, 144.08, 142.00, 137.79, 137.48, 135.33, 132.35, 131.37, 131.08, 129.38, 129.17, 129.05, 124.75, 124.13, 123.05, 122.88, 122.31, 121.43, 121.07, 121.03, 119.68, 119.20, 117.72, 117.55, 110.37.

Anal. Calcd. for  $C_{34}H_{24}IrN_7S$ : C, 53.35; H, 3.26; N, 13.20%. Found: C, 53.75; H, 3.49; N, 12.48 %.

$C_{33}H_{25}IrN_7S$  [ $M^+$ ] Exact Mass: 743.1438. Expected HRMS [ $M+H$ ] $^+$ : 744.1515; Found HRMS [ $M+H$ ] $^+$ : 744.1508.

Cyclometalated Ir(III) complex **2**:

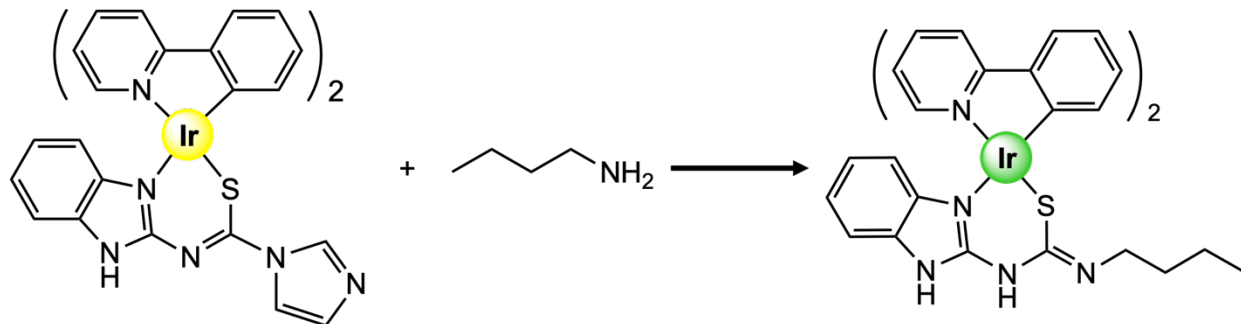

A mixture of iridium primer complex (**4**) (60.1 mg, 0.080 mmol, 1.0 eq), *n*-butylamine (0.01 mL, 0.104 mmol, 1.3 eq) and Et<sub>3</sub>N (0.11 mL, 0.802 mmol, 10 eq) was dissolved in DMF (10 mL). The reaction was heated to 153°C and stirred for 48 hours. Then, the reaction was slowly cooled down to room temperature. The mixture was quenched with water (20 mL) and diluted with EtOAc (15 mL). The aqueous phase was washed further with EtOAc (2 x 15 mL), before the organic phases were combined, dried over with anhydrous MgSO<sub>4</sub>, filtered and concentrated *in vacuo*. The crude product was purified by flash column chromatography on silica eluting with EtOAc to afford **2** (56.8 mg, 94%) as a yellow solid. The characterization matches that reported in literature.<sup>18</sup>

<sup>1</sup>H NMR (400 MHz, CDCl<sub>3</sub>) δ 9.21 (d, *J* = 6.0 Hz, 1H), 8.43 (br. s, 1H), 8.16 (d, *J* = 5.4 Hz, 1H), 7.95 (d, *J* = 8.2 Hz, 1H), 7.81 – 7.74 (m, 2H), 7.73 – 7.67 (m, 1H), 7.62 (d, *J* = 7.8 Hz, 1H), 7.55 (d, *J* = 7.6 Hz, 1H), 7.25 – 7.20 (m, 1H), 7.16 – 7.10 (m, 1H), 7.05 – 6.99 (m, 2H), 6.98 – 6.89 (m, 2H), 6.88 – 6.83 (m, 1H), 6.80 – 6.75 (m, 1H), 6.73 – 6.68 (m, 1H), 6.44 (d, *J* = 8.4 Hz, 1H), 6.37 (d, *J* = 7.4 Hz, 1H), 6.22 (d, *J* = 7.5 Hz, 1H), 3.54 – 3.38 (m, 2H), 1.42 – 1.31 (m, 2H), 1.23 (dd, *J* = 12.7, 5.7 Hz, 2H), 0.92 – 0.87 (m, 3H).

Cyclometalated Ir(III) complex **5**:

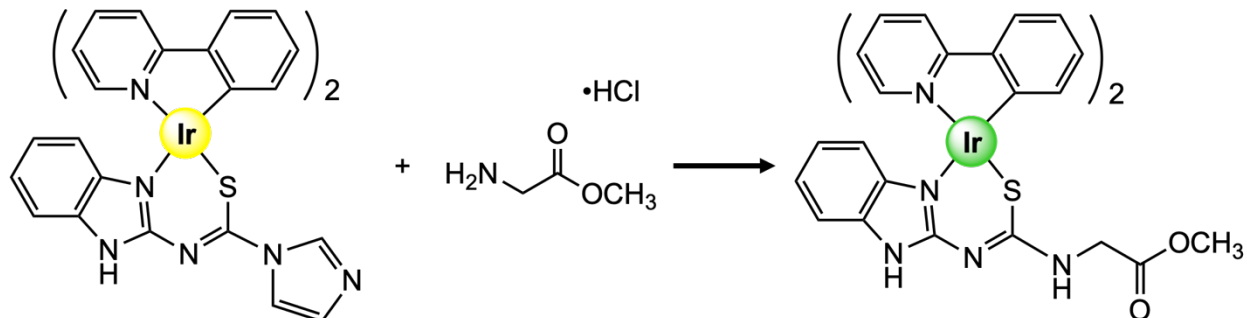

A mixture of iridium primer complex (**4**) (0.03 g, 0.040 mmol, 1.0 eq), glycine methyl ester hydrochloride (0.0066 g, 0.052 mmol, 1.3 eq) and Et<sub>3</sub>N (0.056 mL, 0.403 mmol, 10 eq) was dissolved in DMF (10 mL). The reaction was heated to 153°C and stirred for 48 hours. Then, the reaction was slowly cooled down to room temperature. The mixture was quenched with water (20 mL) and diluted with EtOAc (15 mL). The aqueous phase was washed further with EtOAc (2 x 15 mL), before the organic phases were combined, dried over with anhydrous MgSO<sub>4</sub>, filtered and concentrated *in vacuo*. The crude product was purified by flash column chromatography on silica eluting with EtOAc to afford **139** (0.0289 g, 94%) as a yellow solid.

<sup>1</sup>H NMR (400 MHz, DMSO-*d*<sub>6</sub>) δ 11.33 (s, 1H), 9.43 – 9.36 (m, 1H), 8.19 (dd, *J* = 7.3, 6.5 Hz, 1H), 8.15 (d, *J* = 7.9 Hz, 1H), 8.02 (d, *J* = 7.9 Hz, 1H), 7.89 – 7.83 (m, 1H), 7.83 – 7.76 (m, 1H), 7.75 – 7.67 (m, *J* = 7.9 Hz, 2H), 7.29 – 7.22 (m, 1H), 7.21 – 7.13 (m, 1H), 6.98 (d, *J* = 7.3 Hz, 1H), 6.84 (dd, *J* = 10.8, 4.1 Hz, 1H), 6.80 – 6.69 (m, 3H), 6.65 – 6.57 (m, 1H), 6.38 – 6.32 (m, 1H), 6.28 (d, *J* = 6.9 Hz, 1H), 6.19 (d, *J* = 8.2 Hz, 1H), 6.02 (d, *J* = 6.9 Hz, 1H), 3.17 – 3.12 (m, 5H).

<sup>13</sup>C NMR (101 MHz, DMSO-*d*<sub>6</sub>) δ 169.52, 168.35, 167.42, 158.78, 153.69, 151.59, 150.38, 149.56, 144.12, 144.08, 142.33, 137.09, 136.72, 132.37, 131.28, 131.17, 128.89,



128.66, 124.43, 123.83, 122.31, 122.11, 120.58, 120.24, 120.01, 119.54, 119.12, 118.73,  
116.16, 108.52, 59.72, 20.74, 14.07.

$C_{33}H_{27}IrN_6O_2S$  [ $M^+$ ] Exact Mass: 764.1545. Expected HRMS [ $M-CH_3$ ] $^+$ : 749.1198; Found  
HRMS [ $M-CH_3$ ] $^+$ : 749.2. Expected HRMS [ $M-C(O)OCH_3$ ] $^+$ :705.1407; Found HRMS [ $M-$   
 $C(O)OCH_3$ ] $^+$ :705.2.

Cyclometalated Ir(III) complex **6**:

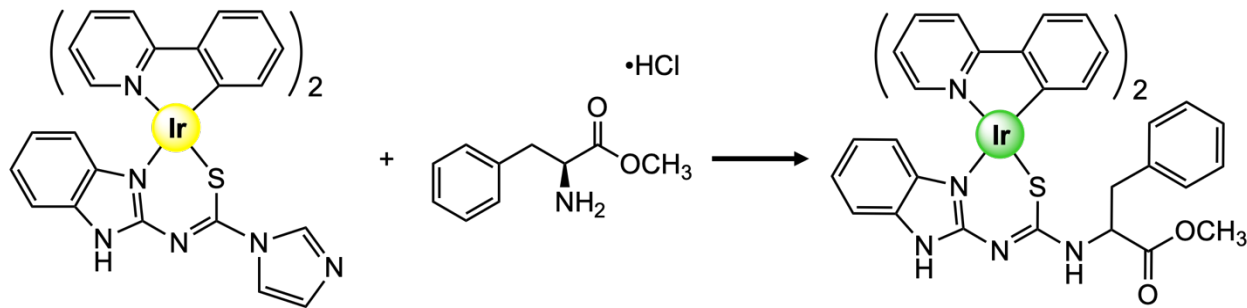

A mixture of iridium primer complex (**4**) (0.1 g, 0.134 mmol, 1.0 eq), L-phenylalanine methyl ester hydrochloride (0.037 g, 0.175 mmol, 1.3 eq) and Et<sub>3</sub>N (0.187 mL, 1.344 mmol, 10 eq) was dissolved in DMF (10 mL). The reaction was heated to 153°C and stirred for 48 hours. Then, the reaction was slowly cooled down to room temperature. The mixture was quenched with water (20 mL) and diluted with EtOAc (15 mL). The aqueous phase was washed further with EtOAc (2 x 15 mL), before the organic phases were combined, dried over with anhydrous MgSO<sub>4</sub>, filtered and concentrated *in vacuo*. The crude product was purified by flash column chromatography on silica eluting with EtOAc to afford **6** (0.1044 g, 91%) as a yellow solid.

<sup>1</sup>H NMR (400 MHz, CDCl<sub>3</sub>) δ 9.61 – 9.43 (m, 1H), 9.00 (s, 1H), 8.51 – 8.24 (m, 1H), 7.99 – 7.80 (m, J = 16.2 Hz, 1H), 7.73 – 7.47 (m, 6H), 7.41 – 7.12 (m, J = 3.0 Hz, 2H), 7.09 – 6.77 (m, 9H), 6.78 – 6.66 (m, J = 6.4 Hz, 1H), 6.64 – 6.53 (m, 1H), 6.53 – 6.38 (m, J = 2.9 Hz, 2H), 6.32 – 6.19 (m, J = 7.0 Hz, 1H), 3.44 – 3.17 (m, 6H).

<sup>13</sup>C NMR (201 MHz, DMSO-*d*<sub>6</sub>) δ 172.78, 171.39, 169.63, 168.32, 167.39, 160.85, 158.66, 153.68, 151.48, 150.32, 149.51, 144.04, 142.26, 136.96, 136.76, 136.58, 132.30, 131.21, 131.06, 128.92, 128.76, 128.53, 128.13, 126.48, 124.30, 123.69, 122.14, 121.94, 120.46, 120.11, 119.88, 119.43, 118.96, 118.59, 116.07, 108.41, 51.78, 39.52, 36.63, 28.86. C<sub>40</sub>H<sub>33</sub>IrN<sub>6</sub>O<sub>2</sub>S [M<sup>+</sup>] Exact Mass: 854.2015. Expected HRMS [M+Na]<sup>+</sup>: 877.2015;

Found HRMS  $[M+Na]^+$ : 877.3. Expected HRMS  $[M-\{(CH_2-(Ph))+(C(O)OCH_3)\}]^+$ : 705.1407; Found HRMS  $[M-\{(CH_2-(Ph))+(C(O)OCH_3)\}]^+$ :705.2. Expected HRMS  $[M-Ancillary\ ligand]^+$ : 501.0943; Found HRMS  $[M-Ancillary\ ligand]^+$ :501.1.

### Cyclometalated Ir(III) complex **7**:

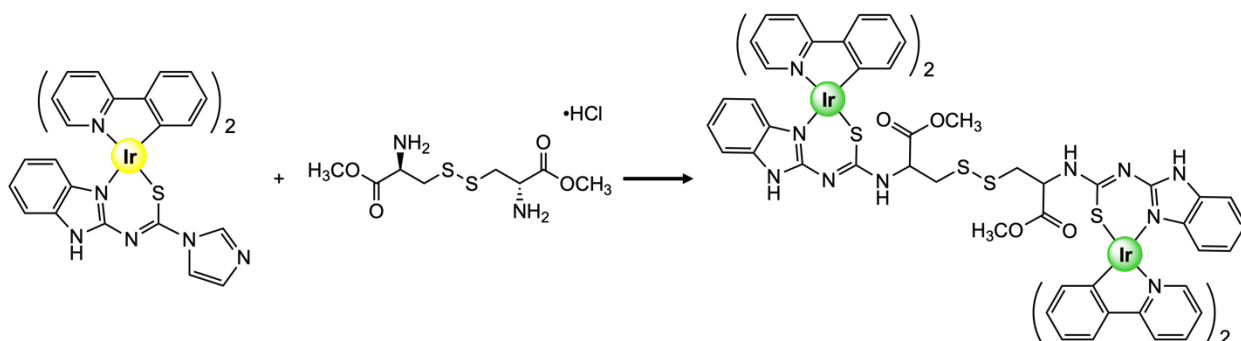

A mixture of iridium primer complex (**4**) (0.1 g, 0.134 mmol, 2.0 eq), L-cystine dimethyl ester hydrochloride (0.023 g, 0.067 mmol, 1.0 eq) and Et<sub>3</sub>N (0.094 mL, 0.672 mmol, 10 eq) was dissolved in DMF (10 mL). The reaction was heated to 153°C and stirred for 48 hours. Then, the reaction was slowly cooled down to room temperature. The mixture was quenched with water (20 mL) and diluted with EtOAc (15 mL). The aqueous phase was washed further with EtOAc (2 x 15 mL), before the organic phases were combined, dried over with anhydrous MgSO<sub>4</sub>, filtered and concentrated *in vacuo*. The crude product was purified by flash column chromatography on silica eluting with EtOAc to afford **7** (0.092 g, 85%) as a yellow solid.

<sup>1</sup>H NMR (400 MHz, DMSO-*d*<sub>6</sub>) δ 11.34 (s, 2H), 9.40 (d, J = 5.8 Hz, 2H), 8.20 (d, J = 5.8 Hz, 2H), 8.15 (d, J = 8.3 Hz, 2H), 8.02 (d, J = 8.3 Hz, 2H), 7.91 – 7.83 (m, 2H), 7.83 – 7.75 (m, 2H), 7.71 (t, J = 8.1 Hz, 4H), 7.29 – 7.22 (m, 2H), 7.21 – 7.14 (m, 2H), 6.99 (d, J = 7.8 Hz, 2H), 6.85 (dd, J = 10.4, 4.4 Hz, 2H), 6.80 – 6.69 (m, 6H), 6.66 – 6.57 (m, 2H), 6.39 – 6.31 (m, 2H), 6.28 (d, J = 7.6 Hz, 2H), 6.19 (d, J = 8.3 Hz, 2H), 6.02 (d, J = 7.6 Hz, 2H), 3.23 – 3.07 (m, J = 10.8, 1.8 Hz, 12H).

<sup>13</sup>C NMR (201 MHz, DMSO-*d*<sub>6</sub>) δ 206.93, 150.06, 137.59, 137.22, 131.77, 131.66, 131.39, 130.74, 130.56, 130.18, 129.38, 129.15, 128.57, 124.93, 124.32, 123.51, 122.81,

122.60, 122.42, 121.87, 121.32, 121.07, 120.88, 120.73, 120.50, 120.03, 119.61, 119.23, 116.64, 114.97, 109.01, 69.76, 29.48, 29.16.

$C_{68}H_{56}Ir_2N_{12}O_4S_4$  [ $M^+$ ] Exact Mass: 1618.2689. Expected HRMS [ $M$ -PPy ligand] $^+$ : 1463.2032; Found HRMS [ $M$ -1Cyclometalated ligand] $^+$ :1463.3. Expected HRMS [ $M$ -{1Ancillary ligand + Ir(III) + 2 Cyclometalated ligands}] $^+$ : 501.0943; Found HRMS [ $M$ -{1Ancillary ligand + Ir(III) + 2 Cyclometalated ligands}] $^+$ : 501.1.

Cyclometalated Ir(III) complex **8**:

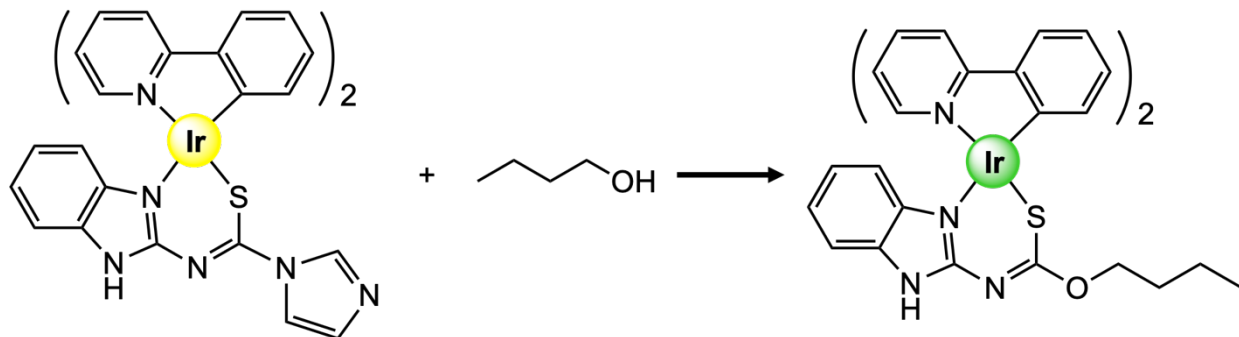

A mixture of iridium primer complex (**4**) (0.1 g, 0.134 mmol, 1.0 eq), 1-butanol (0.016 mL, 0.175 mmol, 1.3 eq) and KHMDS (0.225 g, 1.344 mmol, 10 eq) was dissolved in DMF (10 mL). The reaction was heated to 153°C and stirred for 48 hours. Then, the reaction was slowly cooled down to room temperature. The mixture was quenched with water (20 mL) and diluted with EtOAc (15 mL). The aqueous phase was washed further with EtOAc (2 x 15 mL), before the organic phases were combined, dried over with anhydrous MgSO<sub>4</sub>, filtered and concentrated *in vacuo*. The crude product was purified by flash column chromatography on silica eluting with EtOAc to afford **8** (0.0876 g, 87%) as a yellow solid. <sup>1</sup>H NMR (400 MHz, DMSO-*d*<sub>6</sub>) δ 11.33 (s, 1H), 9.39 (d, J = 2.2 Hz, 1H), 8.18 (t, J = 5.2 Hz, 1H), 8.15 (d, J = 8.1 Hz, 1H), 8.02 (d, J = 8.1 Hz, 1H), 7.89 – 7.82 (m, 1H), 7.83 – 7.75 (m, 1H), 7.70 (dd, J = 11.0, 5.0 Hz, 2H), 7.30 – 7.22 (m, 1H), 7.21 – 7.14 (m, 1H), 6.98 (dd, J = 7.7, 2.1 Hz, 1H), 6.85 (ddd, J = 7.5, 5.5, 2.3 Hz, 1H), 6.81 – 6.69 (m, 3H), 6.65 – 6.57 (m, 1H), 6.38 – 6.31 (m, 1H), 6.28 (dd, J = 7.4, 2.2 Hz, 1H), 6.19 (dd, J = 8.1, 2.4 Hz, 1H), 6.02 (dd, J = 7.5, 2.2 Hz, 1H), 3.17 – 3.11 (m, J = 3.1 Hz, 4H), 1.29 – 1.22 (m, 5H).

<sup>13</sup>C NMR (201 MHz, DMSO-*d*<sub>6</sub>) δ 169.52, 168.37, 167.43, 158.80, 153.70, 151.62, 150.38, 149.57, 144.15, 144.10, 142.35, 137.11, 136.74, 132.39, 131.30, 131.19, 128.91,

128.68, 124.45, 123.85, 122.34, 122.13, 120.60, 120.25, 120.02, 119.55, 119.14, 118.75,  
116.17, 108.53, 59.74, 29.77, 20.76, 14.09.

$C_{34}H_{30}IrN_5OS$  [ $M^+$ ] Exact Mass: 749.1800. Expected HRMS [ $M-CH_2CH_2CH_3$ ] $^+$ : 705.1247;

Found HRMS [ $M-CH_2CH_2CH_3$ ] $^+$ : 705.2. Expected HRMS [ $M$ -Ancillary ligand] $^+$ : 501.0943;

Found HRMS [ $M$ -Ancillary ligand] $^+$ :501.1.

Cyclometalated Ir(III) complex **9**:

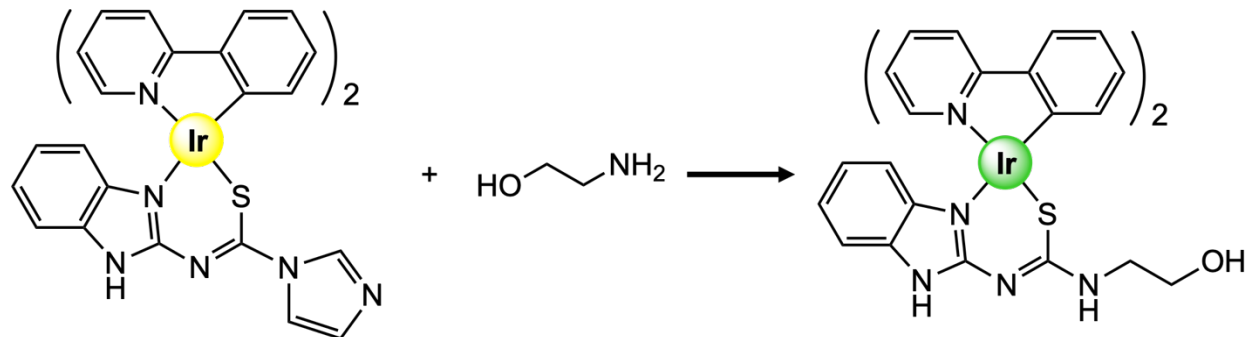

A mixture of iridium primer complex (**4**) (0.05 g, 0.0672 mmol, 1.0 eq), ethanolamine (0.006 mL, 0.0873 mmol, 1.3 eq) and Et<sub>3</sub>N (0.094 mL, 0.672 mmol, 10 eq) was dissolved in DMF (10 mL). The reaction was heated to 153°C and stirred for 48 hours. Then, the reaction was slowly cooled down to room temperature. The mixture was quenched with water (20 mL) and diluted with EtOAc (15 mL). The aqueous phase was washed further with EtOAc (2 x 15 mL), before the organic phases were combined, dried over with anhydrous MgSO<sub>4</sub>, filtered and concentrated *in vacuo*. The crude product was purified by flash column chromatography on silica eluting with EtOAc to afford **9** (0.0505 g, 97%) as a yellow solid.

<sup>1</sup>H NMR (800 MHz, DMSO-*d*<sub>6</sub>) δ 11.34 (s, 1H), 9.39 (dd, *J* = 5.8, 0.8 Hz, 1H), 8.21 – 8.19 (m, 1H), 8.15 (d, *J* = 8.1 Hz, 1H), 8.02 (d, *J* = 8.0 Hz, 1H), 7.87 – 7.84 (m, 1H), 7.80 – 7.77 (m, 1H), 7.73 – 7.71 (m, 1H), 7.71 – 7.69 (m, 1H), 7.25 (ddd, *J* = 7.3, 5.9, 1.4 Hz, 1H), 7.17 (ddd, *J* = 7.3, 5.9, 1.4 Hz, 1H), 6.98 (d, *J* = 7.5 Hz, 1H), 6.86 – 6.83 (m, 1H), 6.78 – 6.75 (m, 1H), 6.75 – 6.72 (m, 2H), 6.63 – 6.58 (m, 1H), 6.36 – 6.33 (m, 1H), 6.29 – 6.26 (m, 1H), 6.19 (d, *J* = 8.3 Hz, 1H), 6.01 (dd, *J* = 9.0, 8.2 Hz, 1H), 3.15 – 3.14 (m, 4H).



$^{13}\text{C}$  NMR (201 MHz,  $\text{DMSO-}d_6$ )  $\delta$  170.00, 168.86, 167.92, 159.30, 154.18, 152.10, 150.88, 150.07, 144.63, 144.58, 142.83, 137.60, 137.23, 132.87, 131.78, 131.68, 129.40, 129.17, 124.94, 124.34, 122.83, 122.62, 121.09, 120.74, 120.51, 120.04, 119.63, 119.24, 116.66, 109.03, 69.99, 60.69.

$\text{C}_{32}\text{H}_{27}\text{IrN}_6\text{OS}$   $[\text{M}^+]$  Exact Mass: 736.1596. Expected HRMS  $[\text{M}+\text{H}]^+$ : 737.1675; Found HRMS  $[\text{M}+\text{H}]^+$ :737.3. Expected HRMS  $[\text{M}+\text{Na}]^+$ :759.1494. Found HRMS  $[\text{M}+\text{Na}]^+$ :759.1.

Cyclometalated Ir(III) complex **10**:

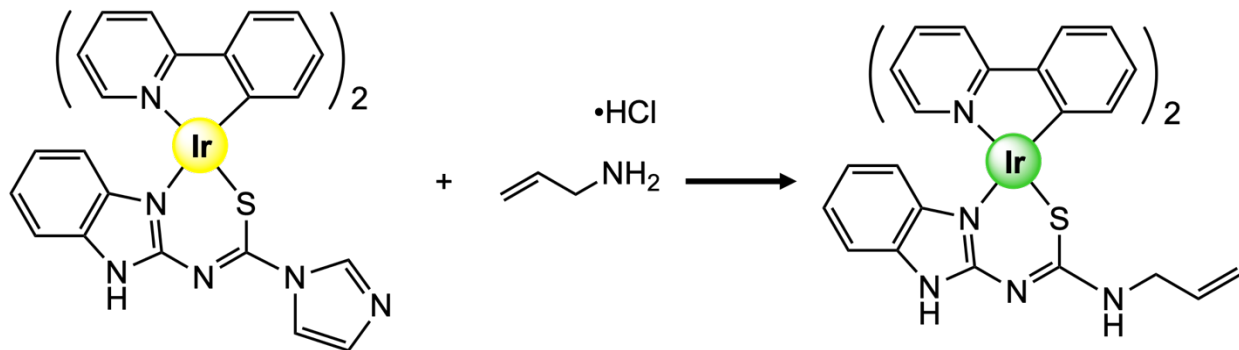

A mixture of iridium primer complex (**4**) (0.1 g, 0.134 mmol, 1.0 eq), allylamine hydrochloride (0.016 g, 0.175 mmol, 1.3 eq) and KHMDS (0.225 g, 1.344 mmol, 10 eq) was dissolved in DMF (10 mL). The reaction was heated to 153°C and stirred for 48 hours. Then, the reaction was slowly cooled down to room temperature. The mixture was quenched with water (20 mL) and diluted with EtOAc (15 mL). The aqueous phase was washed further with EtOAc (2 x 15 mL), before the organic phases were combined, dried over with anhydrous MgSO<sub>4</sub>, filtered and concentrated *in vacuo*. The crude product was purified by flash column chromatography on silica eluting with EtOAc to afford **10** (0.0885 g, 90%) as a yellow solid.

<sup>1</sup>H NMR (800 MHz, DMSO-*d*<sub>6</sub>) δ 12.51 (s, 1H), 9.72 (dd, J = 5.7, 0.9 Hz, 1H), 8.11 (d, J = 8.0 Hz, 1H), 8.05 (d, J = 8.0 Hz, 1H), 7.99 (dd, J = 5.7, 0.7 Hz, 1H), 7.91 (s, 1H), 7.89 – 7.86 (m, 1H), 7.85 – 7.82 (m, 1H), 7.69 – 7.66 (m, 2H), 7.35 (ddd, J = 7.3, 5.8, 1.4 Hz, 1H), 7.23 (ddd, J = 7.3, 5.8, 1.4 Hz, 1H), 7.11 – 7.09 (m, 1H), 6.82 – 6.80 (m, 1H), 6.74 – 6.71 (m, 2H), 6.71 – 6.68 (m, 1H), 6.62 – 6.59 (m, 1H), 6.16 (dd, J = 7.7, 0.9 Hz, 1H), 6.05 (dd, J = 7.6, 0.9 Hz, 1H), 2.79 – 2.76 (m, 2H).

<sup>13</sup>C NMR (201 MHz, DMSO-*d*<sub>6</sub>) δ 168.46, 167.71, 152.40, 150.82, 150.73, 149.46, 145.18, 144.69, 139.68, 137.71, 137.43, 136.79, 132.22, 131.20, 129.83, 129.42, 128.84,

127.17, 125.27, 124.66, 124.12, 123.28, 122.76, 122.72, 122.43, 120.87, 120.52, 119.90, 119.30, 118.99, 117.96, 114.60, 60.23.

$C_{33}H_{27}IrN_6S$  [ $M^+$ ] Exact Mass: 732.1647. Expected HRMS [ $M+H$ ] $^+$ : 733.1726; Found HRMS [ $M+H$ ] $^+$ : 733.2. Expected HRMS [ $M-(=CH_2)$ ] $^+$ : 719.1563; Found HRMS [ $M-(=CH_2)$ ] $^+$ : 719.2. Expected HRMS [ $M$ -Ancillary ligand] $^+$ : 501.0943; Found HRMS [ $M$ -Ancillary ligand] $^+$ : 501.1. Expected HRMS [ $M-H$ ] $^+$ : 730.1568; Found HRMS [ $M-H$ ] $^+$ : 731.2.

Cyclometalated Ir(III) complex **11**:

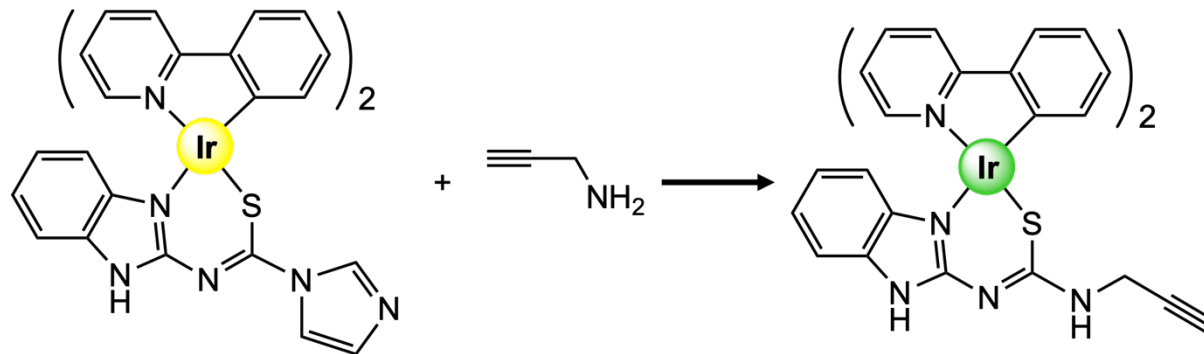

A mixture of iridium primer complex (**4**) (0.15 g, 0.202 mmol, 1.0 eq), propargylamine (0.017 mL, 0.262 mmol, 1.3 eq) and KHMDS (0.337 g, 2.016 mmol, 10 eq) was dissolved in DMF (10 mL). The reaction was heated to 153°C and stirred for 48 hours. Then, the reaction was slowly cooled down to room temperature. The mixture was quenched with water (20 mL) and diluted with EtOAc (15 mL). The aqueous phase was washed further with EtOAc (2 x 15 mL), before the organic phases were combined, dried over with anhydrous MgSO<sub>4</sub>, filtered and concentrated *in vacuo*. The crude product was purified by flash column chromatography on silica eluting with EtOAc to afford **11** (0.1353 g, 92%) as a yellow solid.

<sup>1</sup>H NMR (400 MHz, DMSO-*d*<sub>6</sub>) δ 11.34 (s, 1H), 9.40 (d, *J* = 5.8 Hz, 1H), 8.20 (d, *J* = 5.7 Hz, 1H), 8.15 (d, *J* = 8.2 Hz, 1H), 8.03 (d, *J* = 8.2 Hz, 1H), 7.90 – 7.83 (m, 1H), 7.82 – 7.76 (m, 1H), 7.74 – 7.68 (m, 2H), 7.25 (ddd, *J* = 5.9, 3.7, 1.2 Hz, 1H), 7.21 – 7.15 (m, 1H), 6.98 (d, *J* = 7.8 Hz, 1H), 6.88 – 6.82 (m, 1H), 6.79 – 6.70 (m, 3H), 6.64 – 6.58 (m, 1H), 6.38 – 6.32 (m, 1H), 6.28 (d, *J* = 7.6 Hz, 1H), 6.19 (d, *J* = 8.3 Hz, 1H), 6.05 – 6.00 (m, 1H), 3.15 (s, 2H), 1.99 (s, 1H).

<sup>13</sup>C NMR (201 MHz, DMSO-*d*<sub>6</sub>) δ 168.38, 167.62, 161.84, 150.22, 149.77, 138.29, 137.98, 132.84, 131.86, 131.57, 129.88, 129.66, 129.55, 129.40, 129.31, 129.16, 127.52,

125.24, 124.62, 123.54, 123.37, 121.91, 121.51, 120.17, 119.76, 119.68, 118.20, 118.02,  
113.34, 110.85, 60.23, 60.21, 30.23.

$C_{33}H_{25}IrN_6S$   $[M^+]$  Exact Mass: 730.1491. Expected HRMS  $[M-(CCH)]^+$ : 719.1563; Found  
HRMS  $[M-(CCH)]^+$ : 719.2. Expected HRMS  $[M-H]^+$ : 729.1412; Found HRMS  $[M-H]^+$ :  
729.2. Expected HRMS  $[M+H]^+$ : 731.157; Found HRMS  $[M+H]^+$ : 731.2.

### SIII: $^1\text{H}$ and $^{13}\text{C}$ NMR Spectra, Mass Spectra and Elemental Analysis

Cyclometalated Ir(III) dimer complex  $[\text{Ir}(\text{ppy})_2\text{Cl}]_2$ :

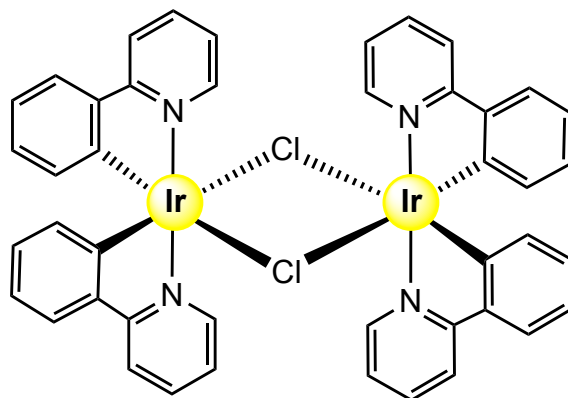

$^1\text{H}$  NMR (400 MHz,  $\text{CDCl}_3$ )  $\delta$  9.28 – 9.19 (m, 1H), 7.87 (d,  $J = 7.8$  Hz, 1H), 7.80 – 7.68 (m, 1H), 7.48 (d,  $J = 7.4$  Hz, 1H), 6.84 – 6.68 (m, 2H), 6.56 (ddd,  $J = 7.8, 1.2, 0.6$  Hz, 1H), 5.93 (d,  $J = 7.8$  Hz, 1H).

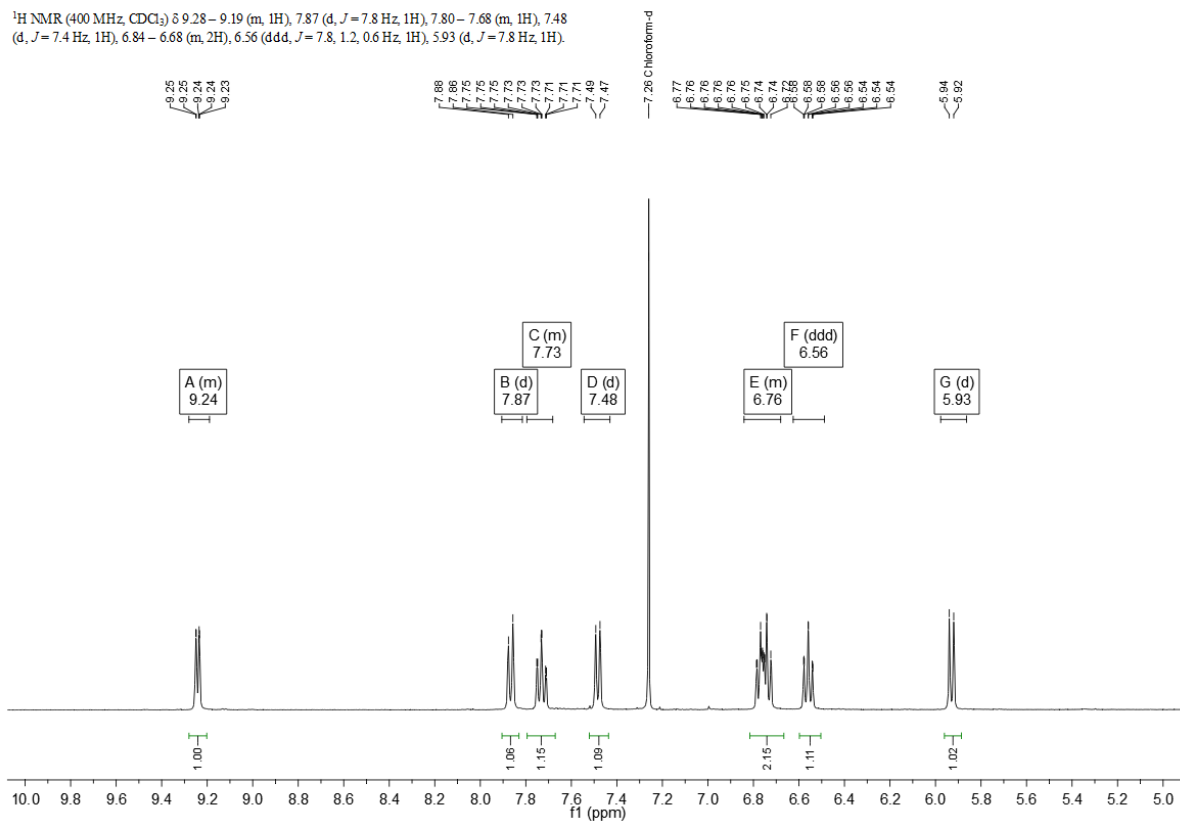

Figure S1. Zoomed  $^1\text{H}$ -NMR spectra of  $[\text{Ir}(\text{ppy})_2\text{Cl}]_2$  (400 MHz,  $\text{DMSO}-d_6$ ) at 298K.

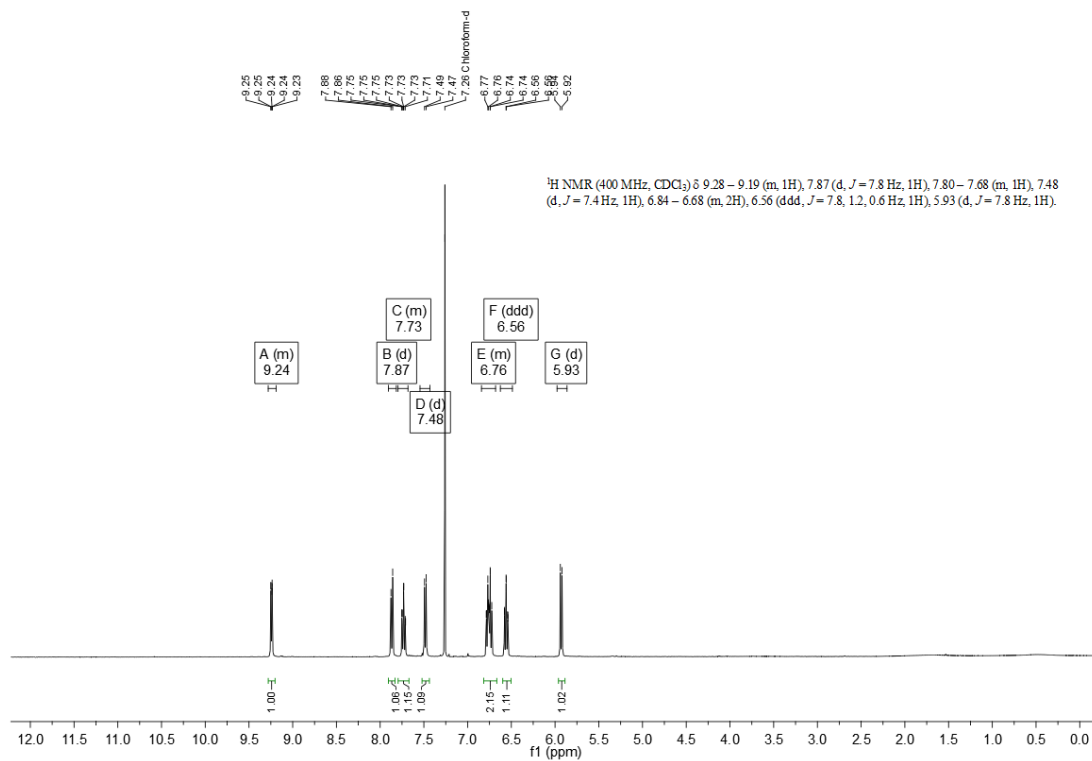

**Figure S2.** <sup>1</sup>H-NMR spectra of [Ir(ppy)<sub>2</sub>Cl]<sub>2</sub> (400 MHz, DMSO-*d*<sub>6</sub>) at 298K.

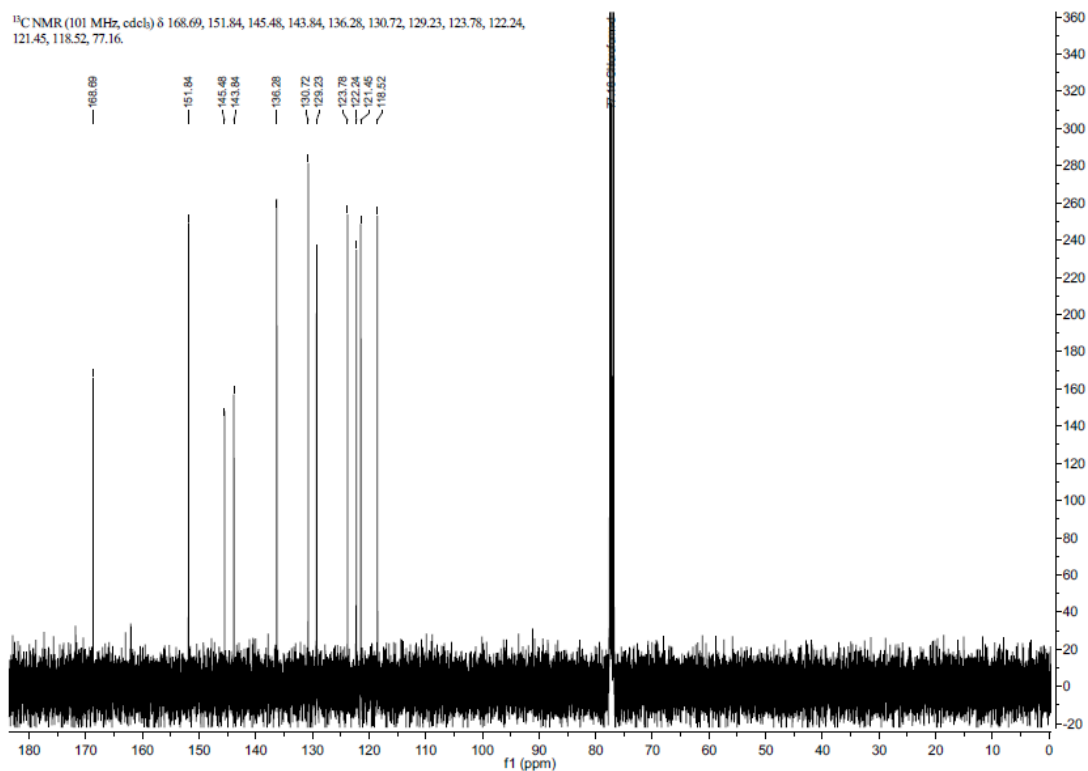

**Figure S3.** <sup>13</sup>C-NMR spectra of compound [Ir(ppy)<sub>2</sub>Cl]<sub>2</sub> (101MHz, DMSO-*d*<sub>6</sub>) at 298K.

*N*-(benzoimidazol-2-yl)imidazole-1-carbothioamide (**3**):

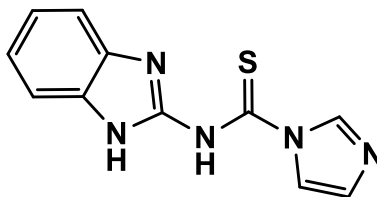

$^1\text{H}$  NMR (400 MHz,  $\text{dms}\text{-}d_6$ )  $\delta$  13.26 (s, 2H), 8.55 (s, 1H), 7.93 (s, 1H), 7.61 (dd,  $J = 5.9, 3.1$  Hz, 2H), 7.34 (dd,  $J = 5.9, 3.1$  Hz, 2H), 7.00 (s, 1H), DMSO (3.32 and 2.50).

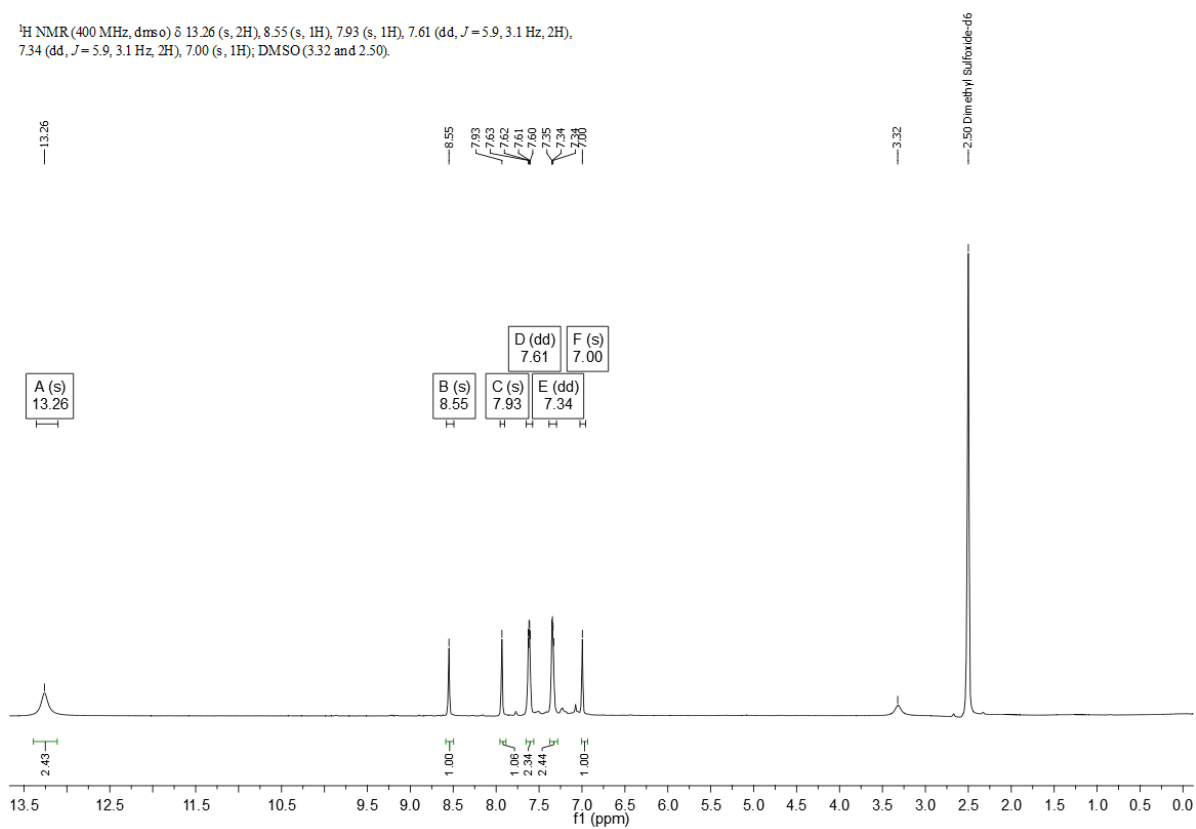

**Figure S4.**  $^1\text{H}$ -NMR spectra of compound **3** (400 MHz,  $\text{DMSO-}d_6$ ) at 298K.



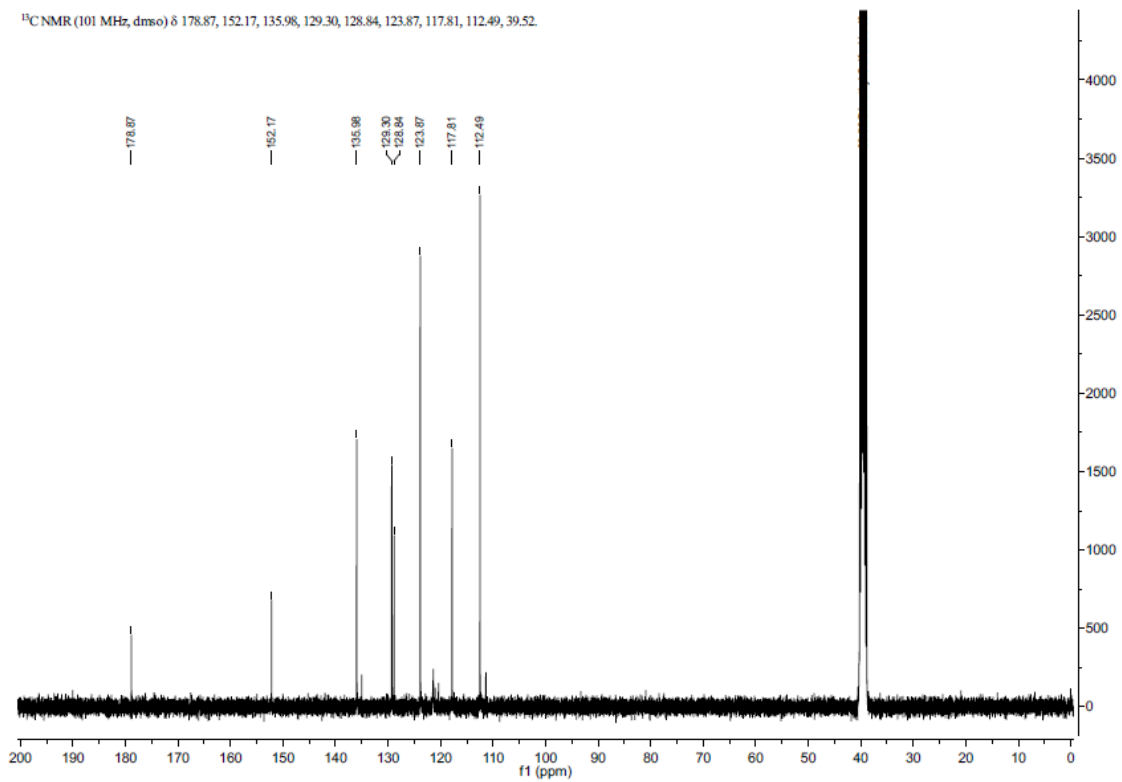

**Figure S5.** <sup>13</sup>C-NMR spectra of compound **3** (101 MHz, DMSO-*d*<sub>6</sub>) at 298K.

Iridium primer complex **4**:

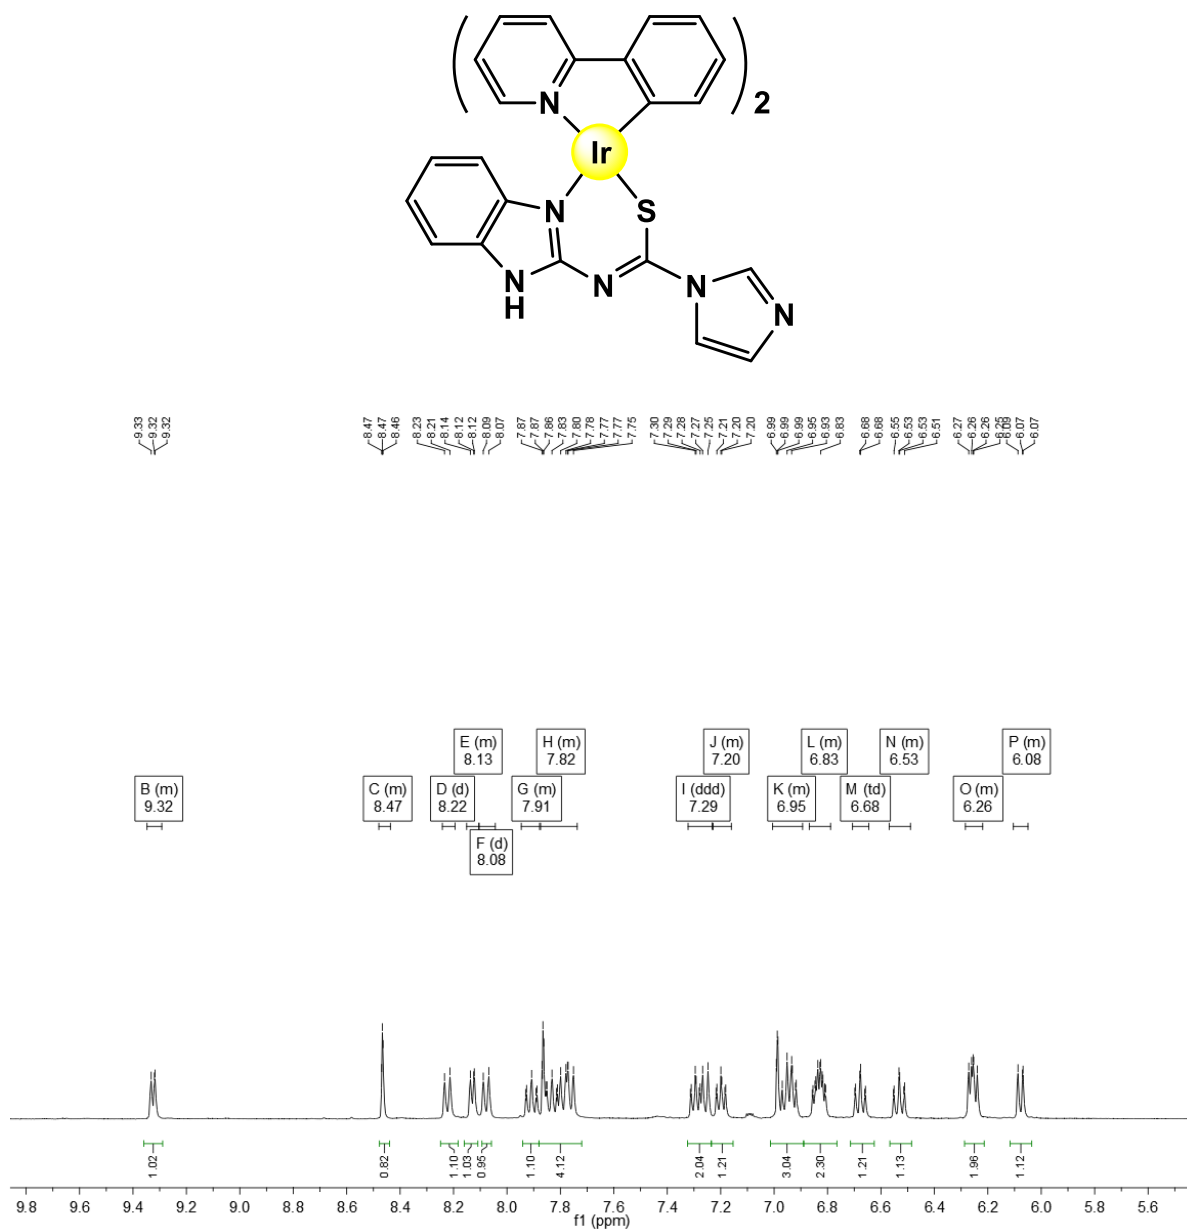

**Figure S6.** Zoomed <sup>1</sup>H-NMR spectra of compound **4** (400 MHz, DMSO-*d*<sub>6</sub>) at 298K.

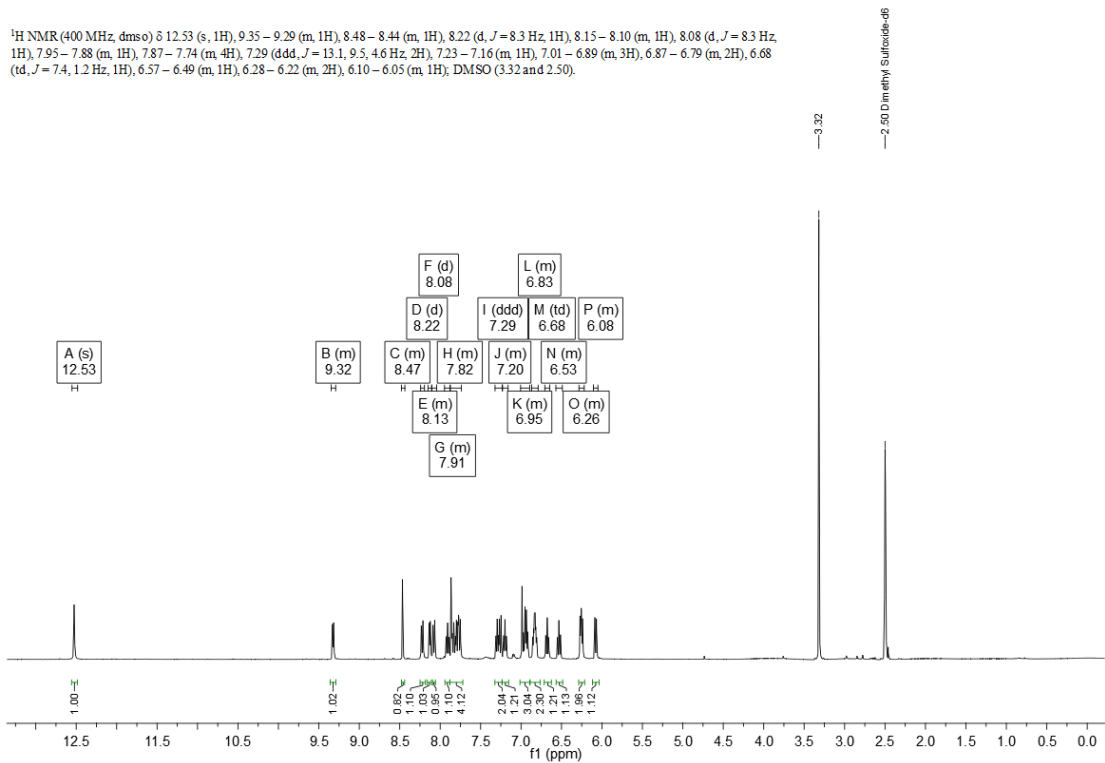

**Figure S7.** <sup>1</sup>H-NMR spectra of compound **4** (400 MHz, DMSO-*d*<sub>6</sub>) at 298K.

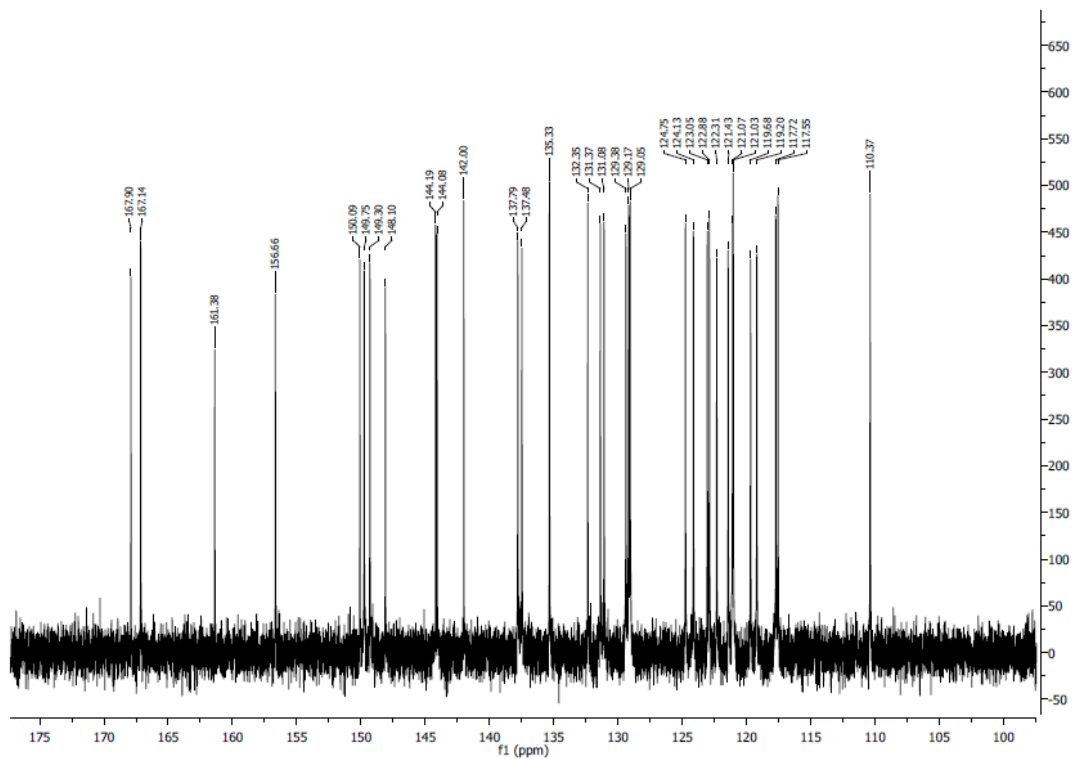

**Figure S8.** Zoomed <sup>13</sup>C-NMR spectra of compound **4** (101 MHz, DMSO-*d*<sub>6</sub>) at 298K.

$^{13}\text{C}$  NMR (101 MHz, dms $o$ )  $\delta$  167.90, 167.14, 161.38, 156.66, 150.09, 149.75, 149.30, 148.10, 144.19, 144.08, 142.00, 137.79, 137.48, 135.33, 132.35, 131.37, 131.08, 129.38, 129.17, 129.05, 124.75, 124.13, 123.05, 122.88, 122.31, 121.43, 121.07, 121.03, 119.68, 119.20, 117.72, 117.55, 110.37.

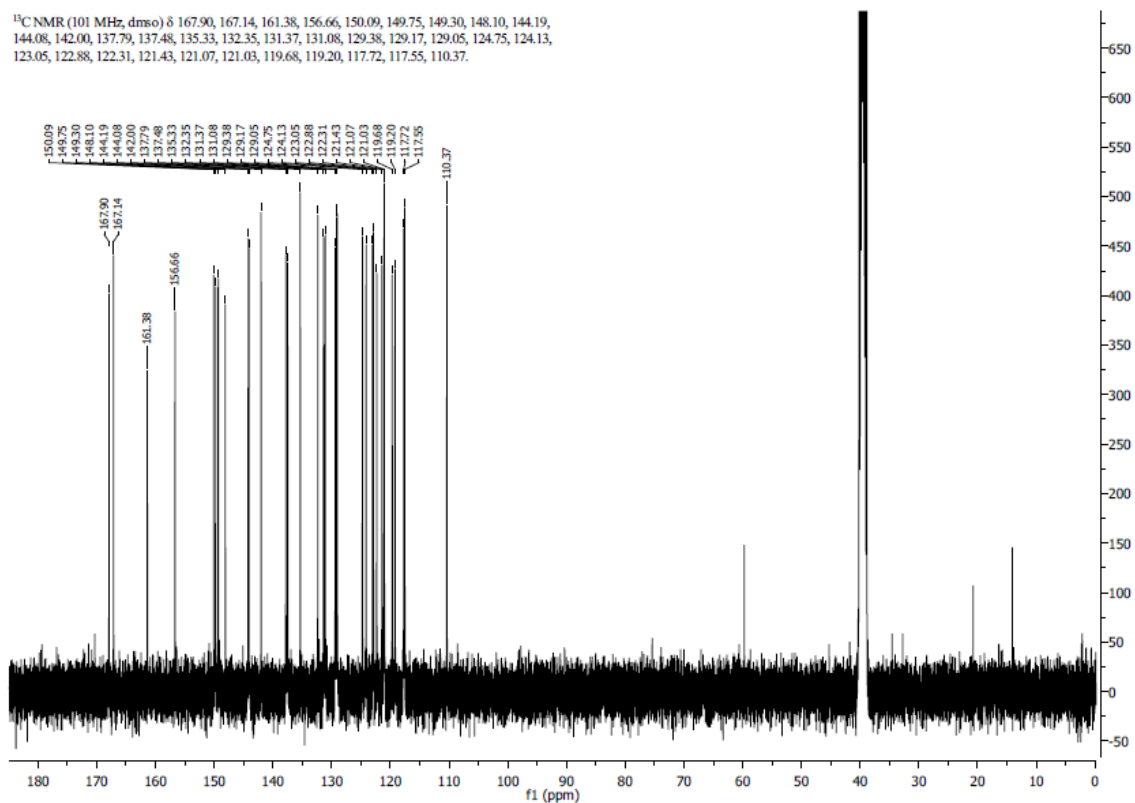

Figure S9.  $^{13}\text{C}$ -NMR spectra of compound **4** (101 MHz, DMSO- $d_6$ ) at 298K.

CHN Analyzer, Perkin Elmer 2400 Series II

User's Name: Martha Tomas  
 Analyzed by: Patricia Granados  
 Date: 18-Feb-22

Standard Calibration: Cystine  
 Supplier: Elemental MicroAnalysis

| Expected Results | Carbon % | Hydrogen % | Nitrogen % |
|------------------|----------|------------|------------|
| Cystine          | 29.99    | 5.03       | 0.00       |
| QC: Caffeine     | 49.48    | 5.16       | 28.83      |
| Iridium Primer   | 53.35    | 3.26       | 13.20      |

Quality Control Standard Results

| Sample Name | Weight mg | Carbon % | Hydrogen % | Nitrogen % |
|-------------|-----------|----------|------------|------------|
| QC          | 3.041     | 50.38    | 5.22       | 28.97      |
| QC          | 3.943     | 50.32    | 5.17       | 29.04      |

Sample Results

| Sample Name    | Weight mg | Carbon % | Hydrogen % | Nitrogen % |
|----------------|-----------|----------|------------|------------|
| Iridium Primer | 2.055     | 53.75    | 3.49       | 12.48      |

Figure S10. CHN results of compound **4**.

# Mass Spectrum SmartFormula Report

## Analysis Info

Analysis Name D:\Data\Xiao\Jan 07 2022\000009.d  
Method Xiao all 1.m  
Sample Name Iridium Primer  
Comment

Acquisition Date 1/7/2022 9:50:35 AM  
Operator x  
Instrument compact 8255754.20059

## Acquisition Parameter

|             |            |                      |          |                  |           |
|-------------|------------|----------------------|----------|------------------|-----------|
| Source Type | ESI        | Ion Polarity         | Positive | Set Nebulizer    | 0.5 Bar   |
| Focus       | Not active | Set Capillary        | 3500 V   | Set Dry Heater   | 181 °C    |
| Scan Begin  | 50 m/z     | Set End Plate Offset | -500 V   | Set Dry Gas      | 4.0 l/min |
| Scan End    | 1500 m/z   | Set Charging Voltage | 2000 V   | Set Divert Valve | Source    |
|             |            | Set Corona           | 0 nA     | Set APCI Heater  | 0 °C      |

| Meas. m/z  | Ion Formula | m/z        | err [ppm] |
|------------|-------------|------------|-----------|
| 744.150838 | C33H25IrN7S | 744.151593 | 1.0       |

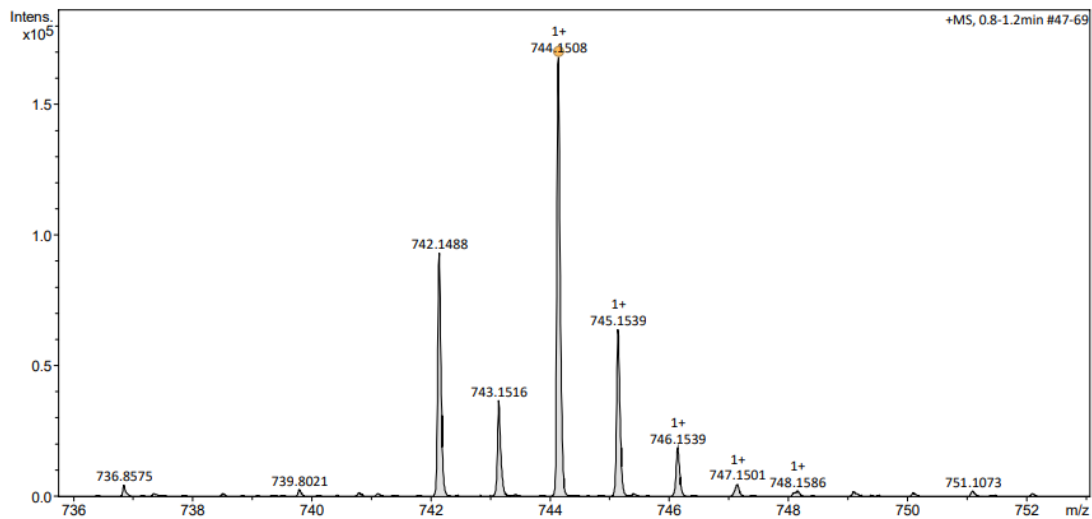

Jan 07 2022\000009.d

Bruker Compass DataAnalysis 4.3

printed: 1/7/2022 9:55:00 AM

by: x

Page 1 of 1

**Figure S11.** Mass Spectroscopy results of compound 4.

Cyclometalated Ir(III) complex **2**:

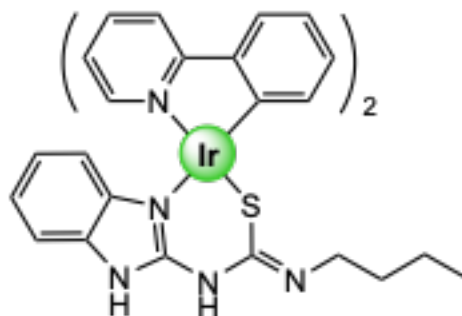

<sup>1</sup>H NMR (400 MHz, cdcl<sub>3</sub>) δ 9.21 (d, *J* = 6.0 Hz, 1H), 8.43 (br. s, 1H), 8.16 (d, *J* = 5.4 Hz, 1H), 7.95 (d, *J* = 8.2 Hz, 1H), 7.81 – 7.74 (m, 2H), 7.73 – 7.67 (m, 1H), 7.62 (d, *J* = 7.8 Hz, 1H), 7.55 (d, *J* = 7.6 Hz, 1H), 7.25 – 7.20 (m, 1H), 7.16 – 7.10 (m, 1H), 7.05 – 6.99 (m, 2H), 6.98 – 6.89 (m, 2H), 6.88 – 6.83 (m, 1H), 6.80 – 6.75 (m, 1H), 6.73 – 6.68 (m, 1H), 6.44 (d, *J* = 8.4 Hz, 1H), 6.37 (d, *J* = 7.4 Hz, 1H), 6.22 (d, *J* = 7.5 Hz, 1H), 3.54 – 3.38 (m, 2H), 1.42 – 1.31 (m, 2H), 1.23 (dd, *J* = 12.7, 5.7 Hz, 2H), 0.92 – 0.87 (m, 3H).

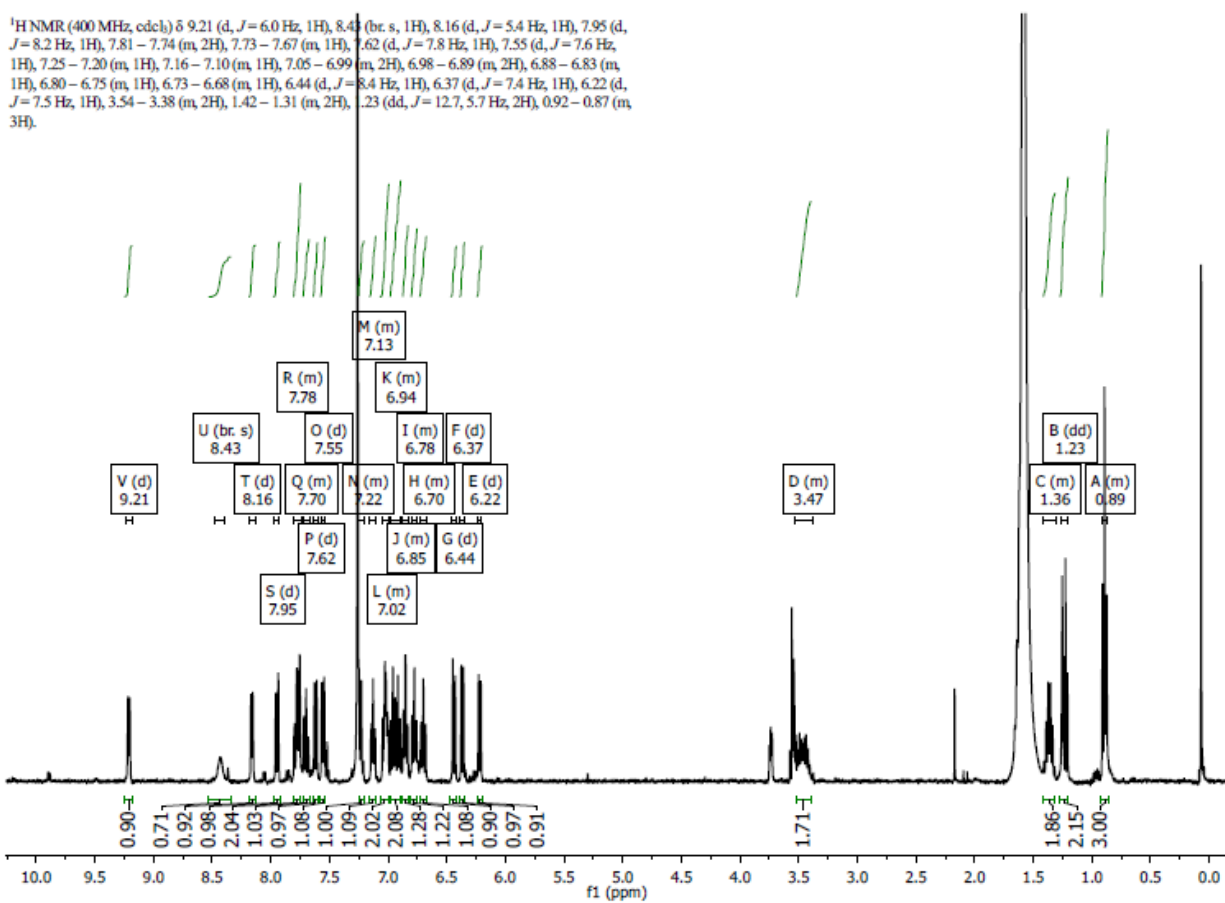

**Figure S12.** <sup>1</sup>H-NMR spectra of compound **2** (400 MHz, CDCl<sub>3</sub>) at 298K.

Cyclometalated Ir(III) complex **5**:

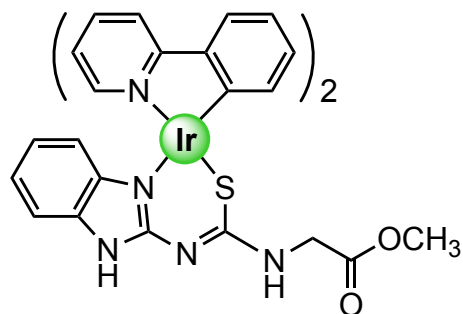

<sup>1</sup>H NMR (400 MHz, dms<sub>o</sub>) δ 11.33 (s, 1H), 9.43–9.36 (m, 1H), 8.19 (dd, *J* = 7.3, 6.5 Hz, 1H), 8.15 (d, *J* = 7.9 Hz, 1H), 8.02 (d, *J* = 7.9 Hz, 1H), 7.89–7.83 (m, 1H), 7.83–7.76 (m, 1H), 7.75–7.67 (m, *J* = 7.9 Hz, 2H), 7.29–7.22 (m, 1H), 7.21–7.13 (m, 1H), 6.98 (d, *J* = 7.3 Hz, 1H), 6.84 (dd, *J* = 10.8, 4.1 Hz, 1H), 6.80–6.69 (m, 3H), 6.65–6.57 (m, 1H), 6.38–6.32 (m, 1H), 6.28 (d, *J* = 6.9 Hz, 1H), 6.19 (d, *J* = 8.2 Hz, 1H), 6.02 (d, *J* = 6.9 Hz, 1H), 3.17–3.12 (m, 5H).

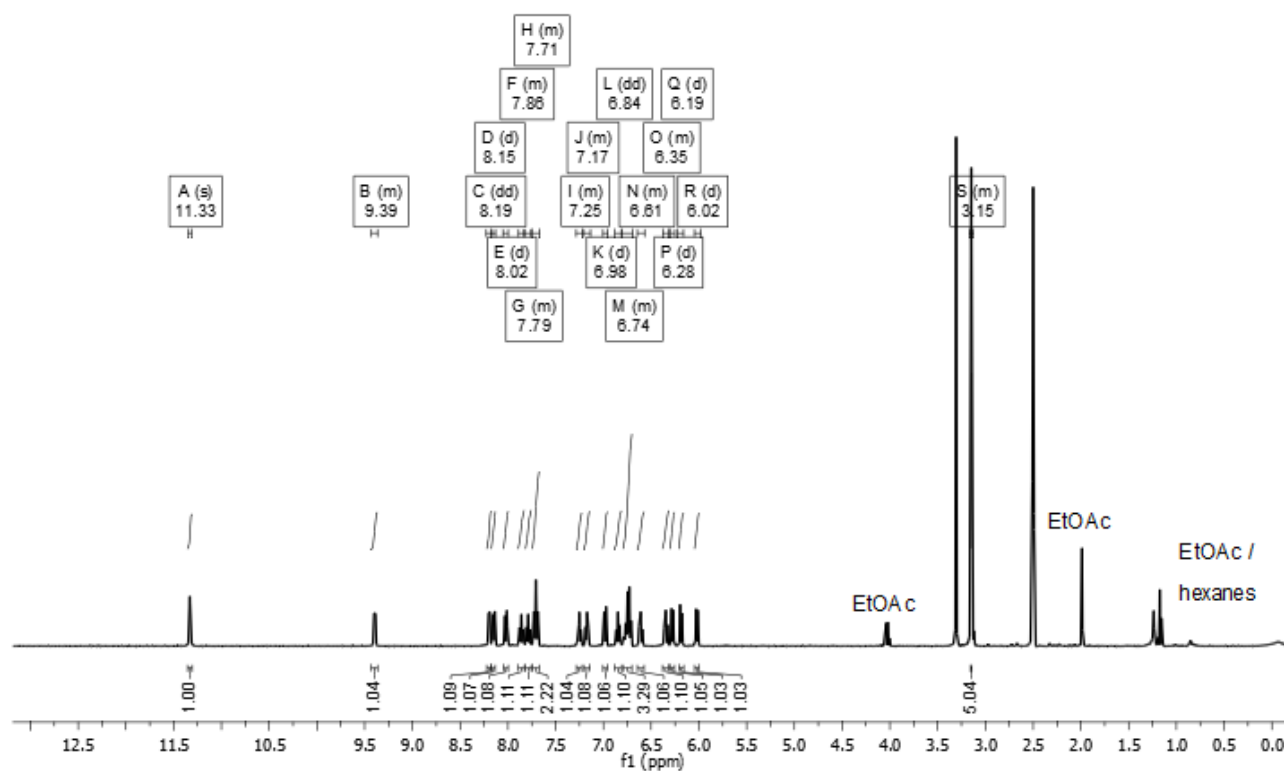

**Figure S13.** <sup>1</sup>H-NMR spectra of compound **5** (400 MHz, DMSO-*d*<sub>6</sub>) at 298K.

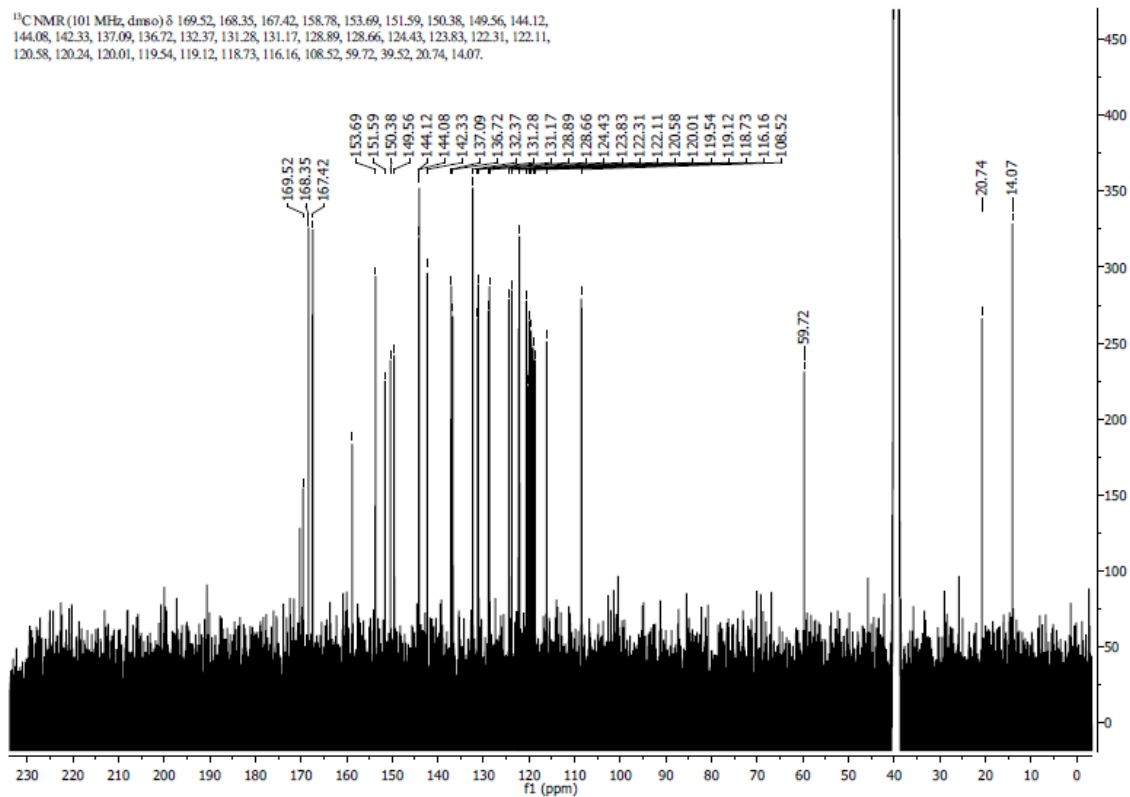

Figure S14. <sup>13</sup>C-NMR spectra of compound **5** (101 MHz, DMSO-*d*<sub>6</sub>) at 298K.

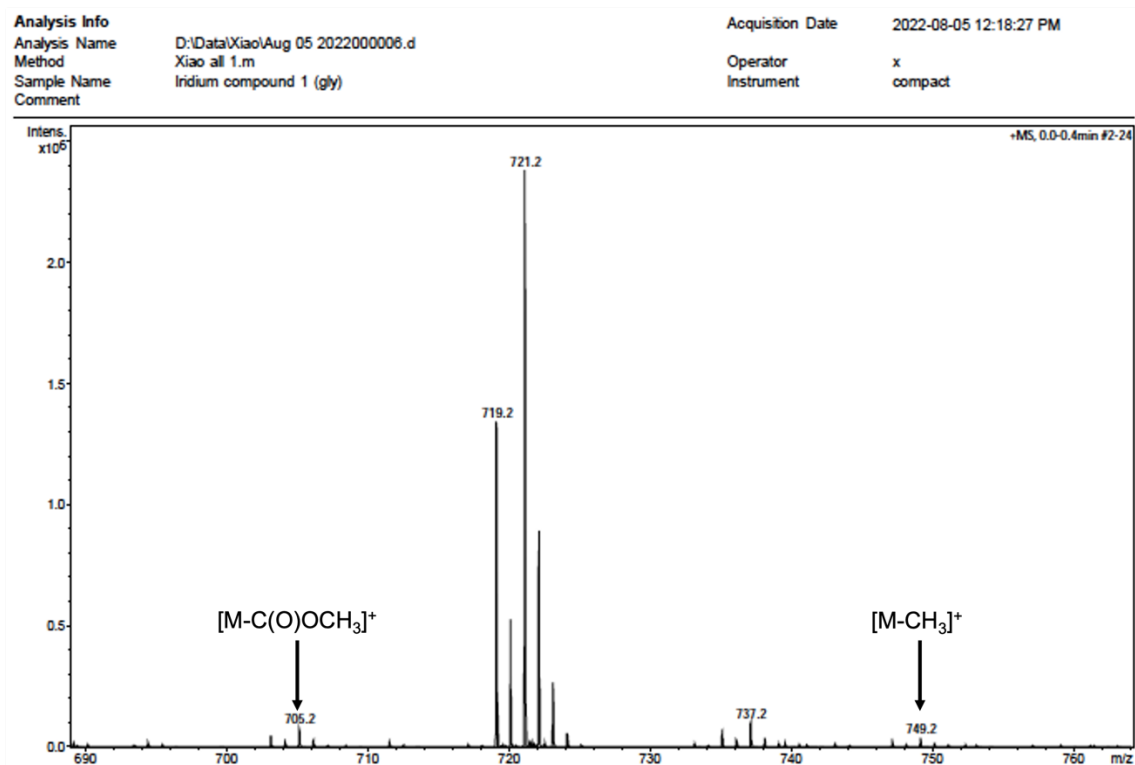

Figure S15. Zoomed Mass Spectroscopy spectra of compound **5**.



Analysis Info  
Analysis Name D:\Data\Xiao\Aug 05 2022\000006.d  
Method Xiao all 1.m  
Sample Name Iridium compound 1 (gly)  
Comment

Acquisition Date 2022-08-05 12:18:27 PM  
Operator x  
Instrument compact

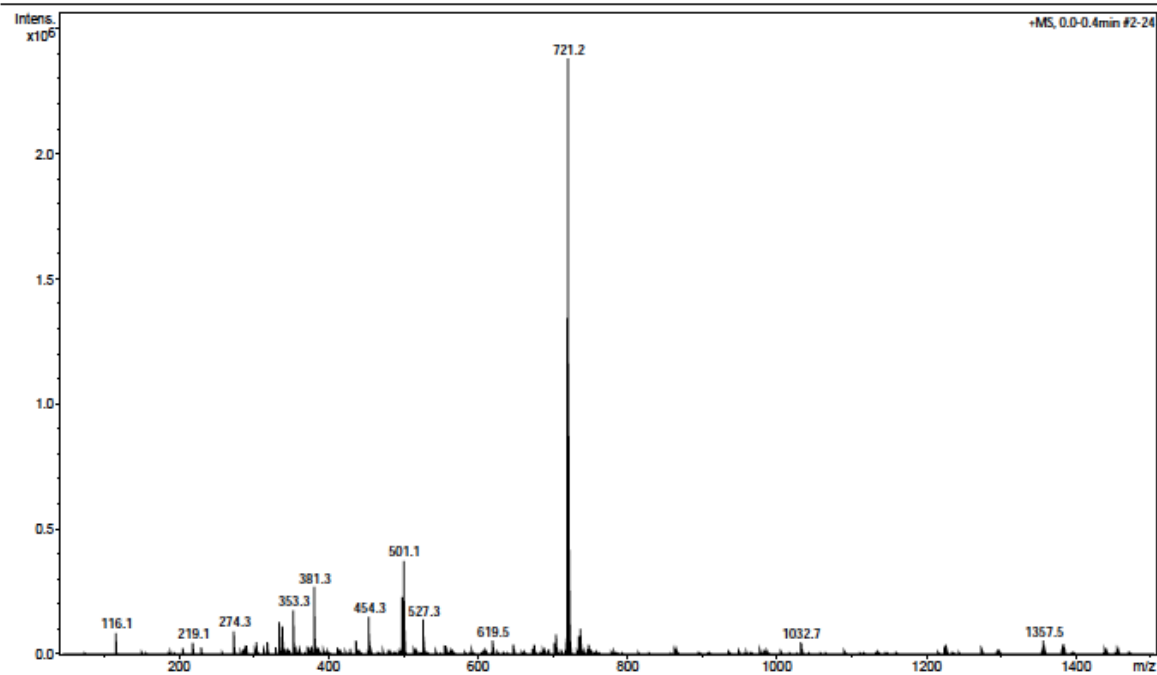

Figure S16. Mass Spectrometry spectra of compound 5.

Cyclometalated Ir(III) complex **6**:

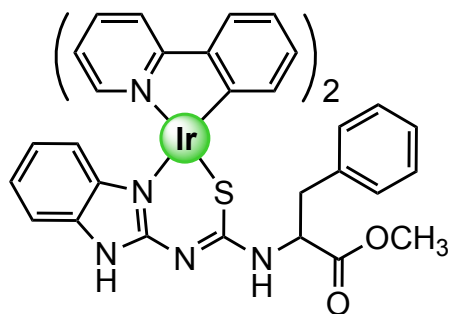

$^1\text{H}$  NMR (400 MHz,  $\text{cdCl}_3$ )  $\delta$  9.61 – 9.43 (m, 1H), 9.00 (s, 1H), 8.51 – 8.24 (m, 1H), 7.99 – 7.80 (m,  $J = 16.2$  Hz, 1H), 7.73 – 7.47 (m, 6H), 7.41 – 7.12 (m,  $J = 3.0$  Hz, 2H), 7.09 – 6.77 (m, 9H), 6.78 – 6.66 (m,  $J = 6.4$  Hz, 1H), 6.64 – 6.53 (m, 1H), 6.53 – 6.38 (m,  $J = 2.9$  Hz, 2H), 6.32 – 6.19 (m,  $J = 7.0$  Hz, 1H), 3.44 – 3.17 (m, 6H).

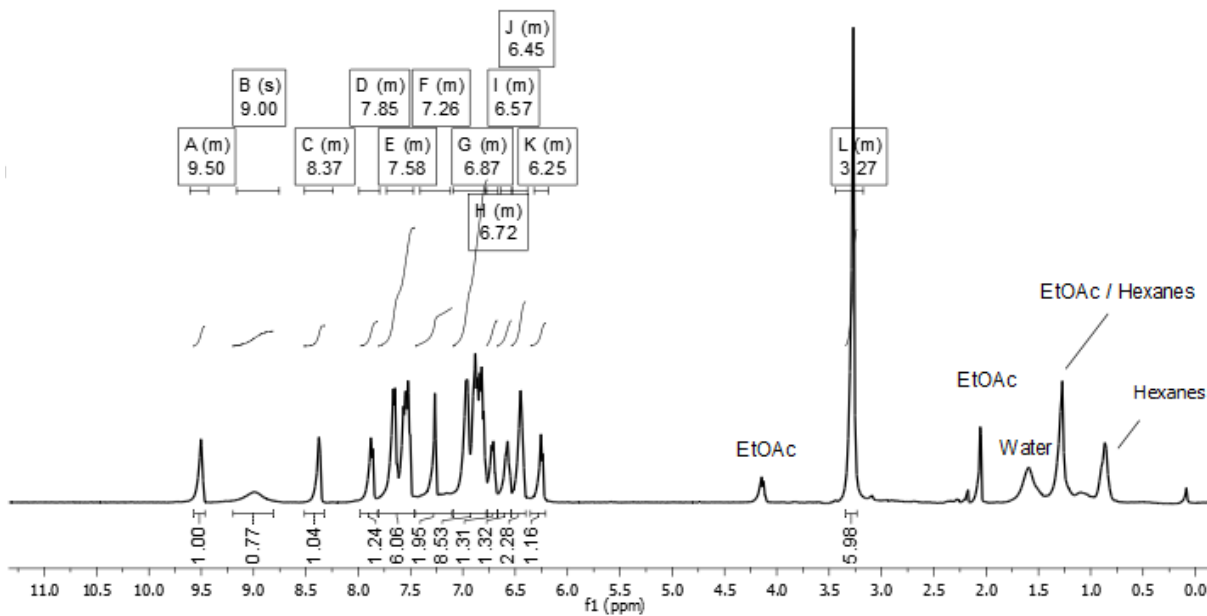

**Figure S17.**  $^1\text{H}$ -NMR spectra of compound **6** (400 MHz,  $\text{DMSO}-d_6$ ) at 298K.

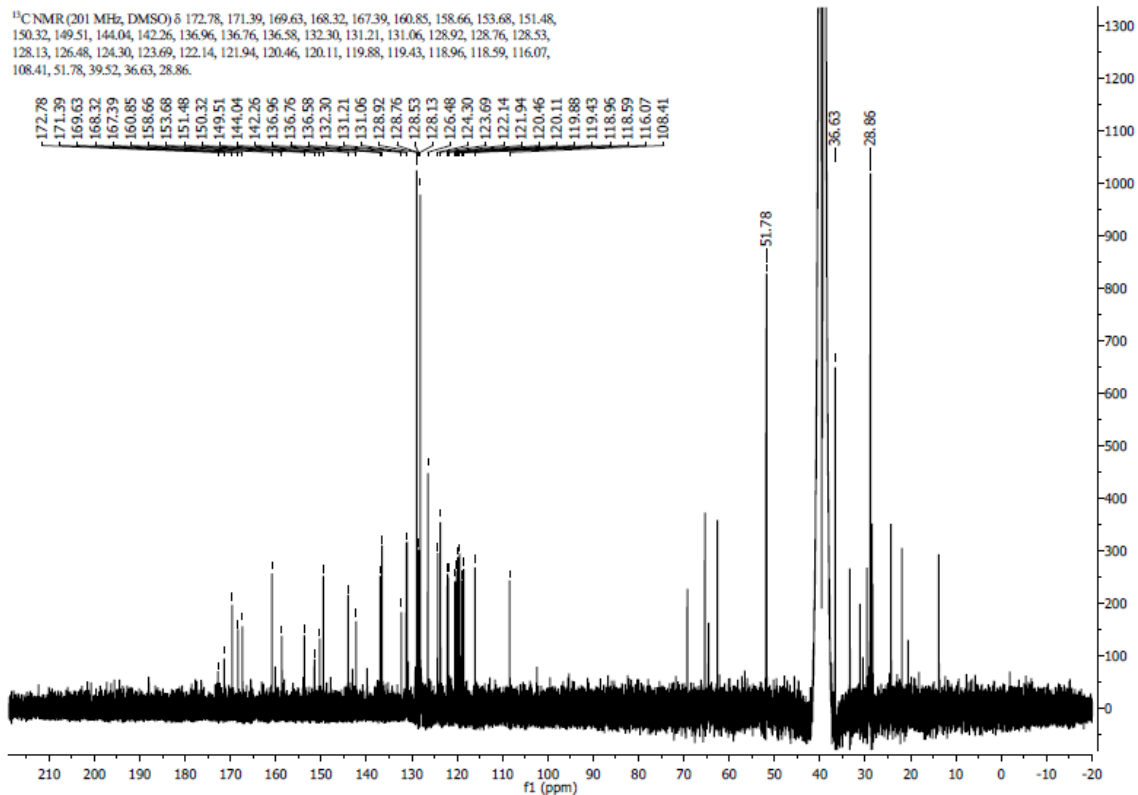

**Figure S18.** <sup>13</sup>C-NMR spectra of compound **6** (201 MHz, DMSO-*d*<sub>6</sub>) at 298K.

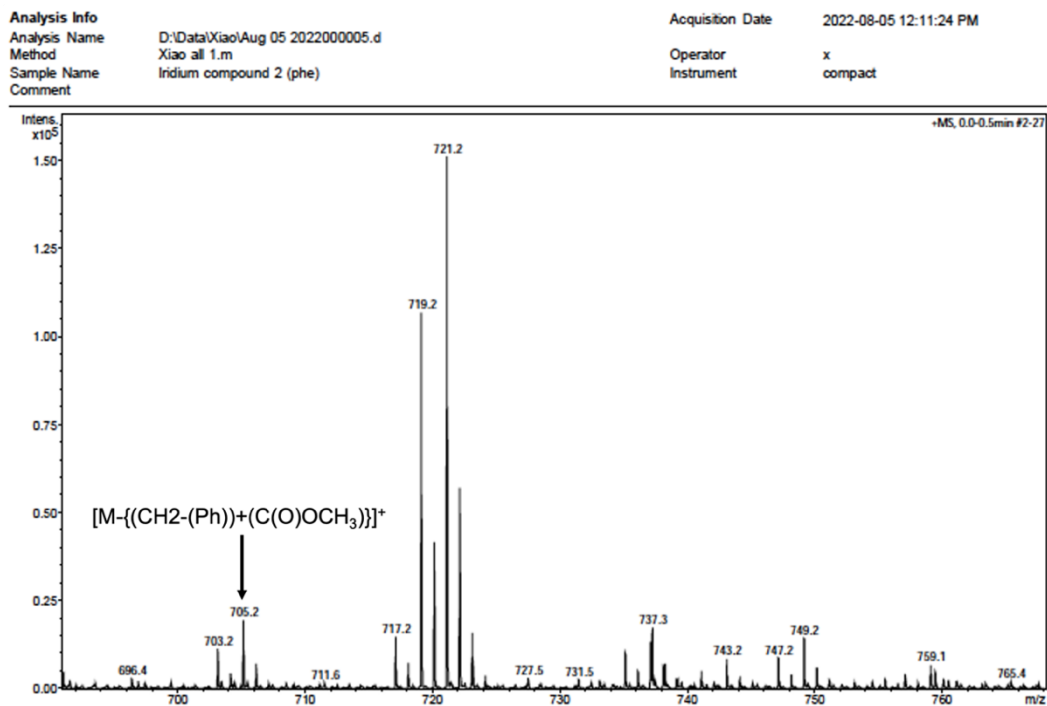

**Figure S19.** Zoomed Mass Spectrometry spectra of compound **6**.

Analysis Info  
Analysis Name  
Method  
Sample Name  
Comment

D:\Data\Xiao\Aug 05 2022\000005.d  
Xiao all 1.m  
Iridium compound 2 (phe)

Acquisition Date 2022-08-05 12:11:24 PM  
Operator x  
Instrument compact

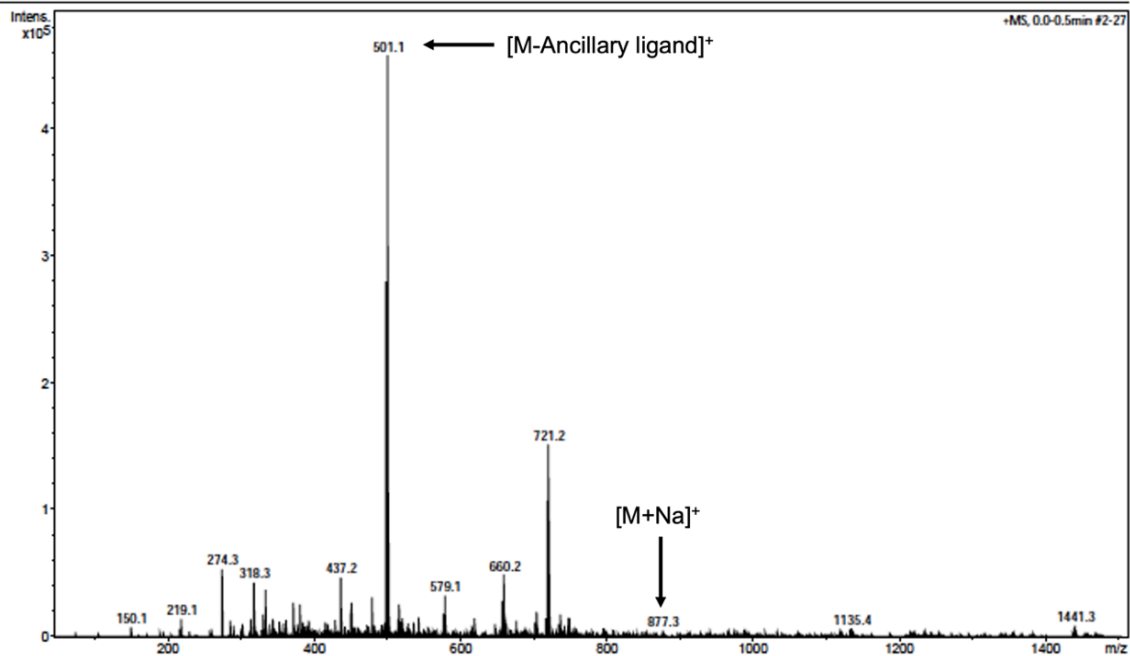

Figure S20. Mass Spectroscopy spectra of compound 6.

Cyclometalated Ir(III) complex **7**:

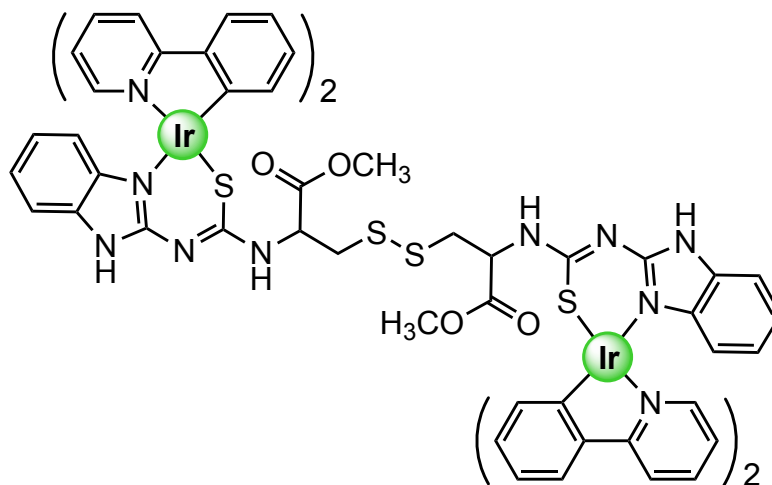

$^1\text{H}$  NMR (400 MHz,  $\text{dms}\text{-}d_6$ )  $\delta$  11.34 (s, 2H), 9.40 (d,  $J = 5.8$  Hz, 2H), 8.20 (d,  $J = 5.8$  Hz, 2H), 8.15 (d,  $J = 8.3$  Hz, 2H), 8.02 (d,  $J = 8.3$  Hz, 2H), 7.91 – 7.83 (m, 2H), 7.83 – 7.75 (m, 2H), 7.71 (t,  $J = 8.1$  Hz, 4H), 7.29 – 7.22 (m, 2H), 7.21 – 7.14 (m, 2H), 6.99 (d,  $J = 7.8$  Hz, 2H), 6.85 (dd,  $J = 10.4, 4.4$  Hz, 2H), 6.80 – 6.69 (m, 6H), 6.66 – 6.57 (m, 2H), 6.39 – 6.31 (m, 2H), 6.28 (d,  $J = 7.6$  Hz, 2H), 6.19 (d,  $J = 8.3$  Hz, 2H), 6.02 (d,  $J = 7.6$  Hz, 2H), 3.23 – 3.07 (m,  $J = 10.8, 1.8$  Hz, 12H).

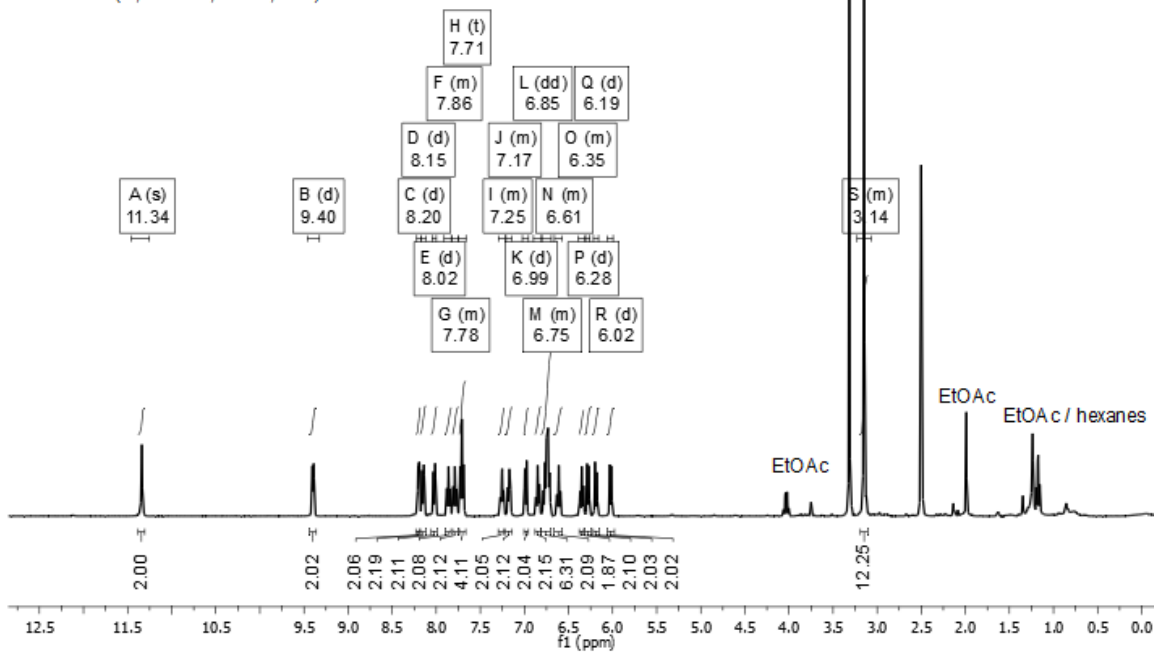

**Figure S21.**  $^1\text{H}$ -NMR spectra of compound **7** (400 MHz,  $\text{DMSO-}d_6$ ) at 298K.

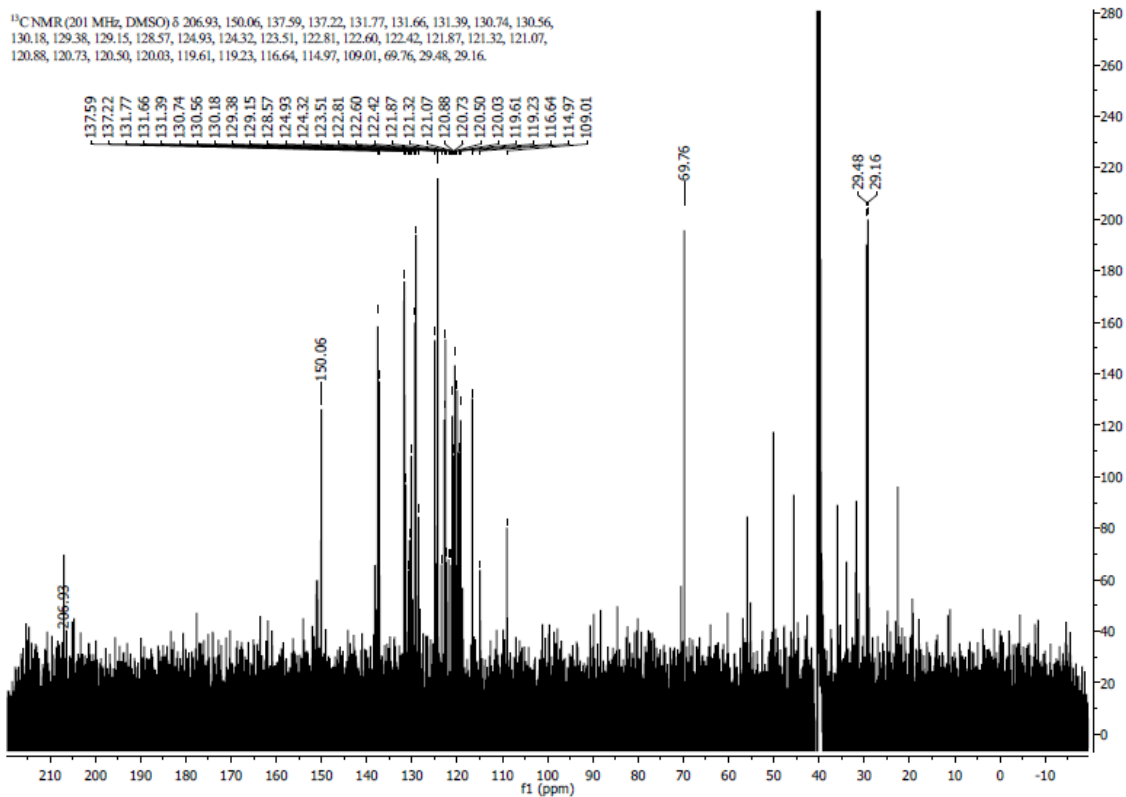

**Figure S22.** <sup>13</sup>C-NMR spectra of compound **7** (201 MHz, DMSO-*d*<sub>6</sub>) at 298K.

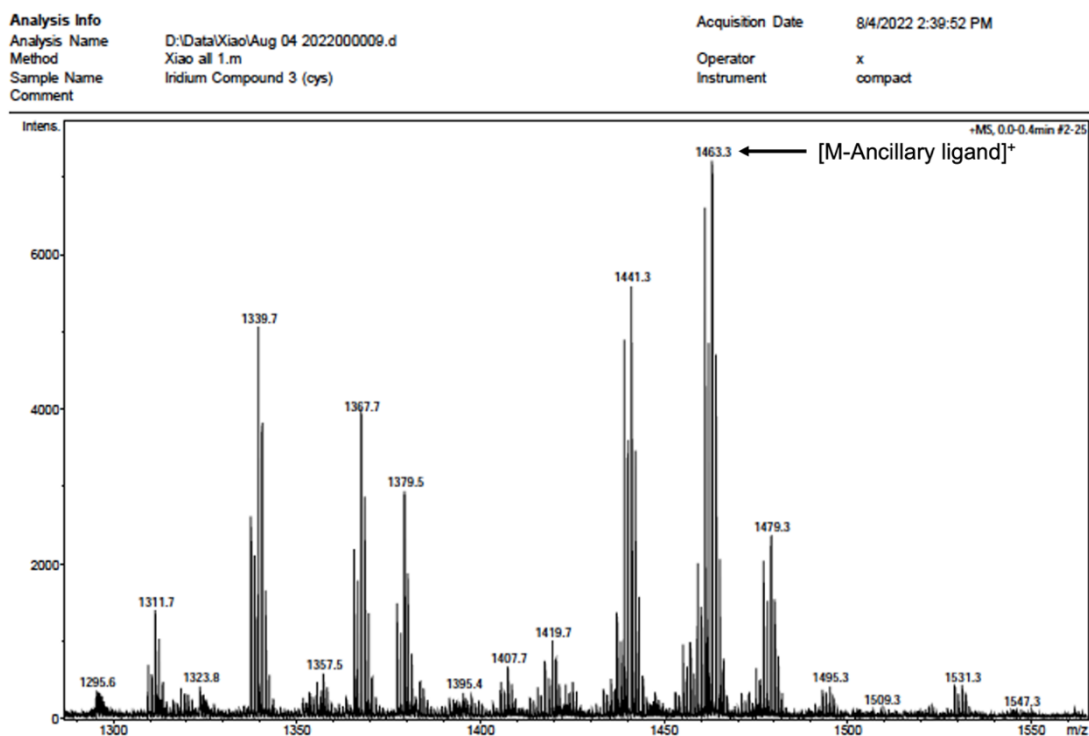

**Figure S23.** Zoomed Mass Spectroscopy spectra of compound **7**.

Analysis Info  
Analysis Name D:\Data\Xiao\Aug 04 2022\000009.d  
Method Xiao all 1.m  
Sample Name Iridium Compound 3 (cys)  
Comment

Acquisition Date 8/4/2022 2:39:52 PM  
Operator x  
Instrument compact

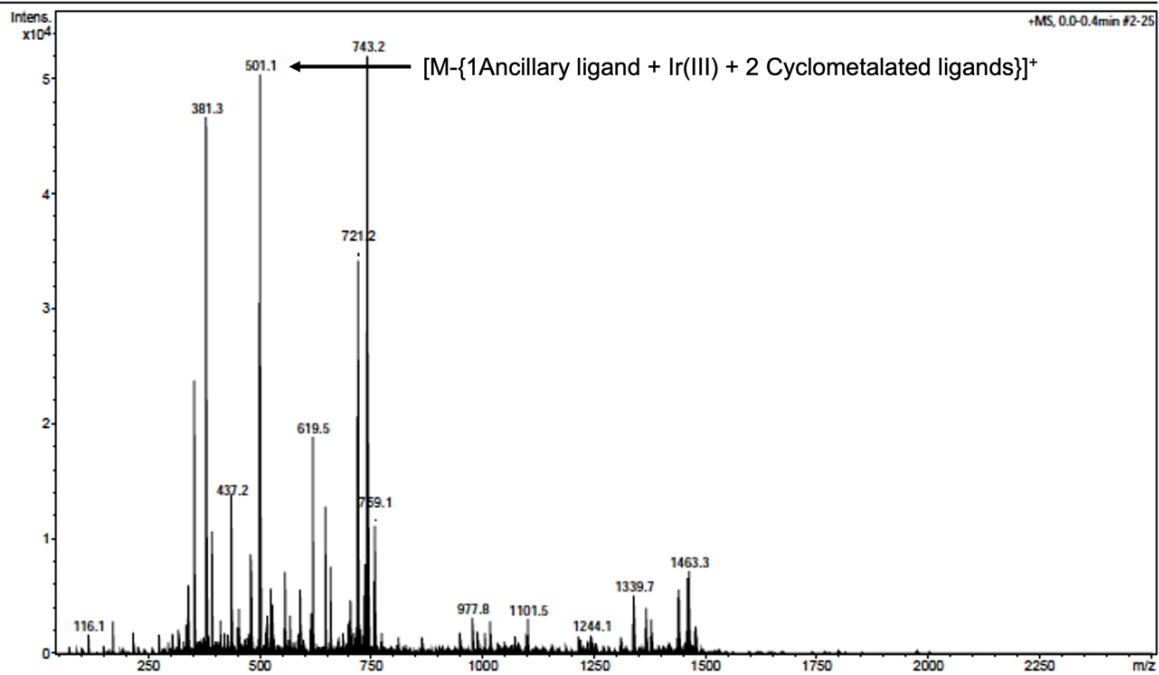

Figure S24. Mass Spectroscopy spectra of compound 7.

Cyclometalated Ir(III) complex **8**:

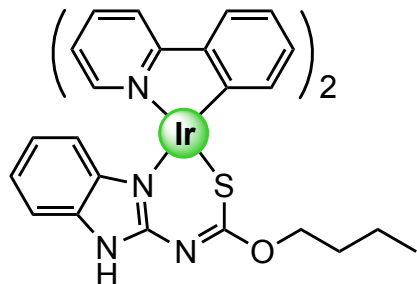

$^1\text{H}$  NMR (400 MHz,  $\text{dms}\text{-}d_6$ )  $\delta$  11.33 (s, 1H), 9.39 (d,  $J = 2.2$  Hz, 1H), 8.18 (t,  $J = 5.2$  Hz, 1H), 8.15 (d,  $J = 8.1$  Hz, 1H), 8.02 (d,  $J = 8.1$  Hz, 1H), 7.89 – 7.82 (m, 1H), 7.83 – 7.75 (m, 1H), 7.70 (dd,  $J = 11.0, 5.0$  Hz, 2H), 7.30 – 7.22 (m, 1H), 7.21 – 7.14 (m, 1H), 6.98 (dd,  $J = 7.7, 2.1$  Hz, 1H), 6.85 (ddd,  $J = 7.5, 5.5, 2.3$  Hz, 1H), 6.81 – 6.69 (m, 3H), 6.65 – 6.57 (m, 1H), 6.38 – 6.31 (m, 1H), 6.28 (dd,  $J = 7.4, 2.2$  Hz, 1H), 6.19 (dd,  $J = 8.1, 2.4$  Hz, 1H), 6.02 (dd,  $J = 7.5, 2.2$  Hz, 1H), 3.17 – 3.11 (m,  $J = 3.1$  Hz, 4H), 1.29 – 1.22 (m, 5H).

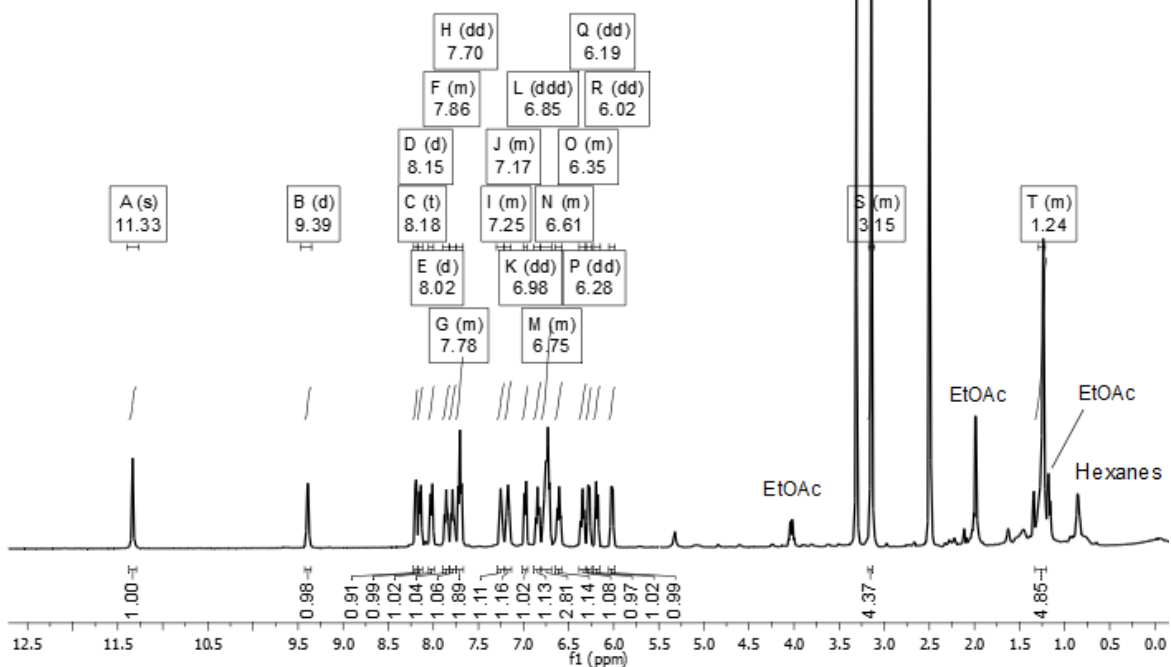

Figure S25.  $^1\text{H}$ -NMR spectra of compound **8** (400 MHz,  $\text{DMSO-}d_6$ ) at 298K.



$^{13}\text{C}$ -NMR (201 MHz, DMSO)  $\delta$  169.52, 168.37, 167.43, 158.80, 153.70, 151.62, 150.38, 149.57, 144.15, 144.10, 142.35, 137.11, 136.74, 132.39, 131.30, 131.19, 128.91, 128.68, 124.45, 123.85, 122.34, 122.13, 120.60, 120.25, 120.02, 119.55, 119.14, 118.75, 116.17, 108.53, 59.74, 29.77, 20.76, 14.09.

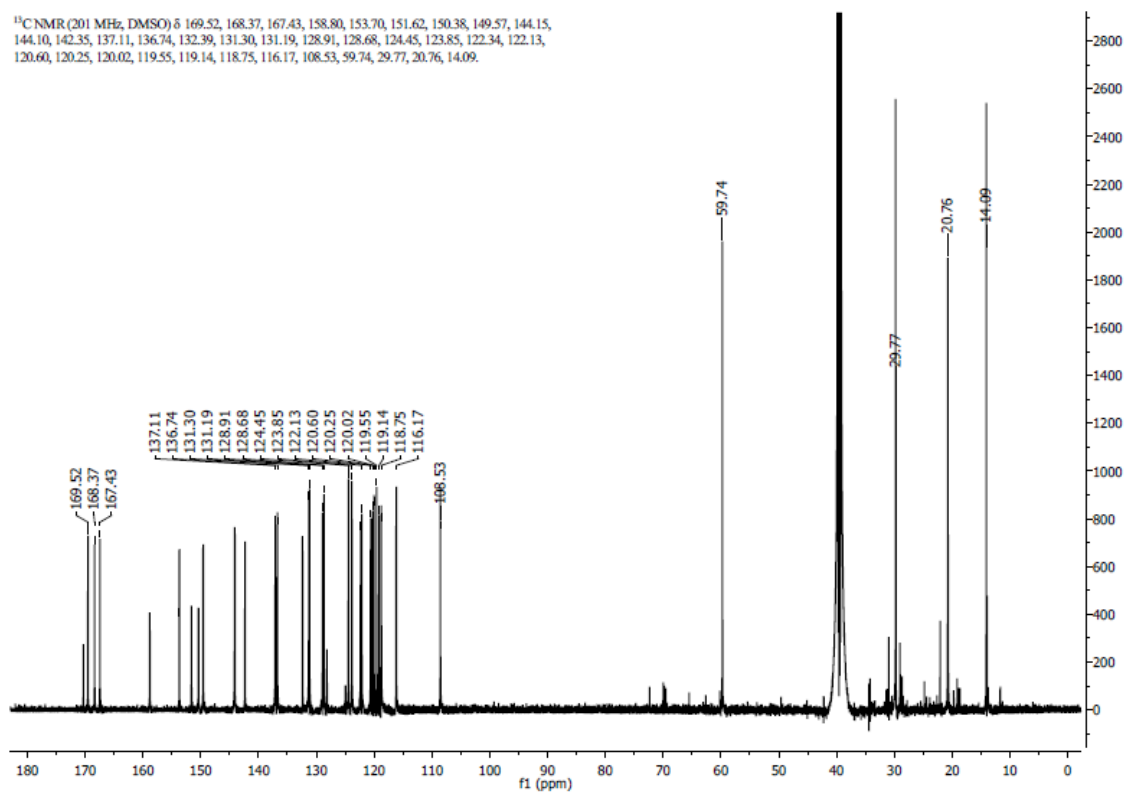

**Figure S26.**  $^{13}\text{C}$ -NMR spectra of compound **8** (201 MHz, DMSO- $d_6$ ) at 298K.

Analysis Info  
Analysis Name  
Method  
Sample Name  
Comment

D:\Data\Xiao\Aug 04 2022\000007.d  
Xiao all 1.m  
Iridium Compound 4 (but)

Acquisition Date 8/4/2022 2:25:18 PM  
Operator x  
Instrument compact

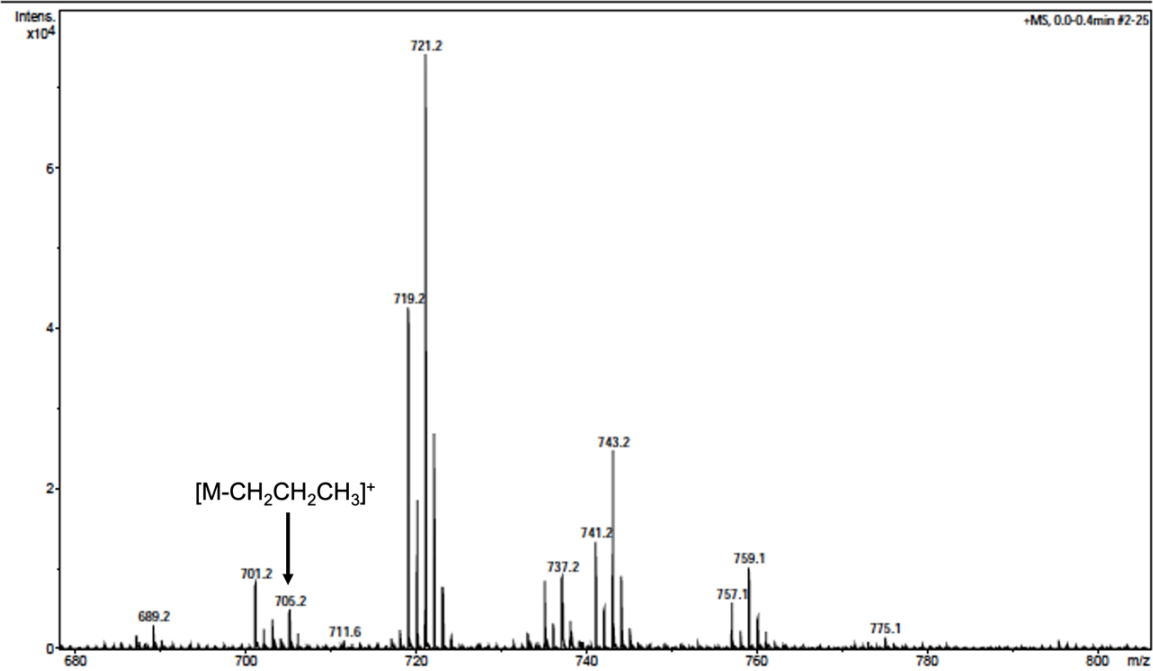

Figure S27. Zoomed Mass Spectroscopy spectra of compound 8.

Analysis Info  
Analysis Name  
Method  
Sample Name  
Comment

D:\Data\Xiao\Aug 04 2022\000007.d  
Xiao all 1.m  
Iridium Compound 4 (but)

Acquisition Date 8/4/2022 2:25:18 PM  
Operator x  
Instrument compact

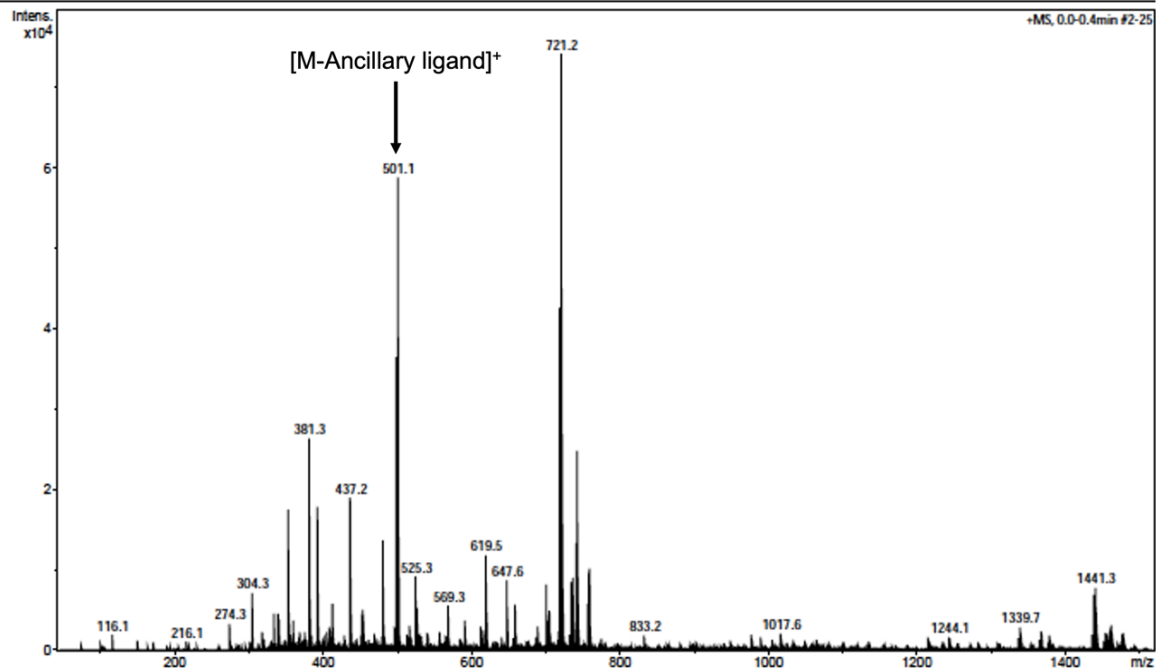

Figure S28. Mass Spectroscopy spectra of compound 8.

Cyclometalated Ir(III) complex **9**:

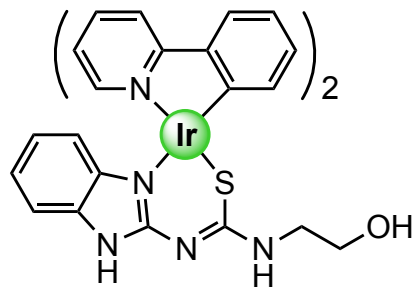

<sup>1</sup>H NMR (800 MHz, DMSO) δ 11.34 (s, 1H), 9.39 (dd, *J* = 5.8, 0.8 Hz, 1H), 8.21 – 8.19 (m, 1H), 8.15 (d, *J* = 8.1 Hz, 1H), 8.02 (d, *J* = 8.0 Hz, 1H), 7.87 – 7.84 (m, 1H), 7.80 – 7.77 (m, 1H), 7.73 – 7.71 (m, 1H), 7.71 – 7.69 (m, 1H), 7.25 (ddd, *J* = 7.3, 5.9, 1.4 Hz, 1H), 7.17 (ddd, *J* = 7.3, 5.9, 1.4 Hz, 1H), 6.98 (d, *J* = 7.5 Hz, 1H), 6.86 – 6.83 (m, 1H), 6.78 – 6.75 (m, 1H), 6.75 – 6.72 (m, 2H), 6.63 – 6.58 (m, 1H), 6.36 – 6.33 (m, 1H), 6.29 – 6.26 (m, 1H), 6.19 (d, *J* = 8.3 Hz, 1H), 6.01 (dd, *J* = 9.0, 8.2 Hz, 1H), 3.15 – 3.14 (m, 4H).

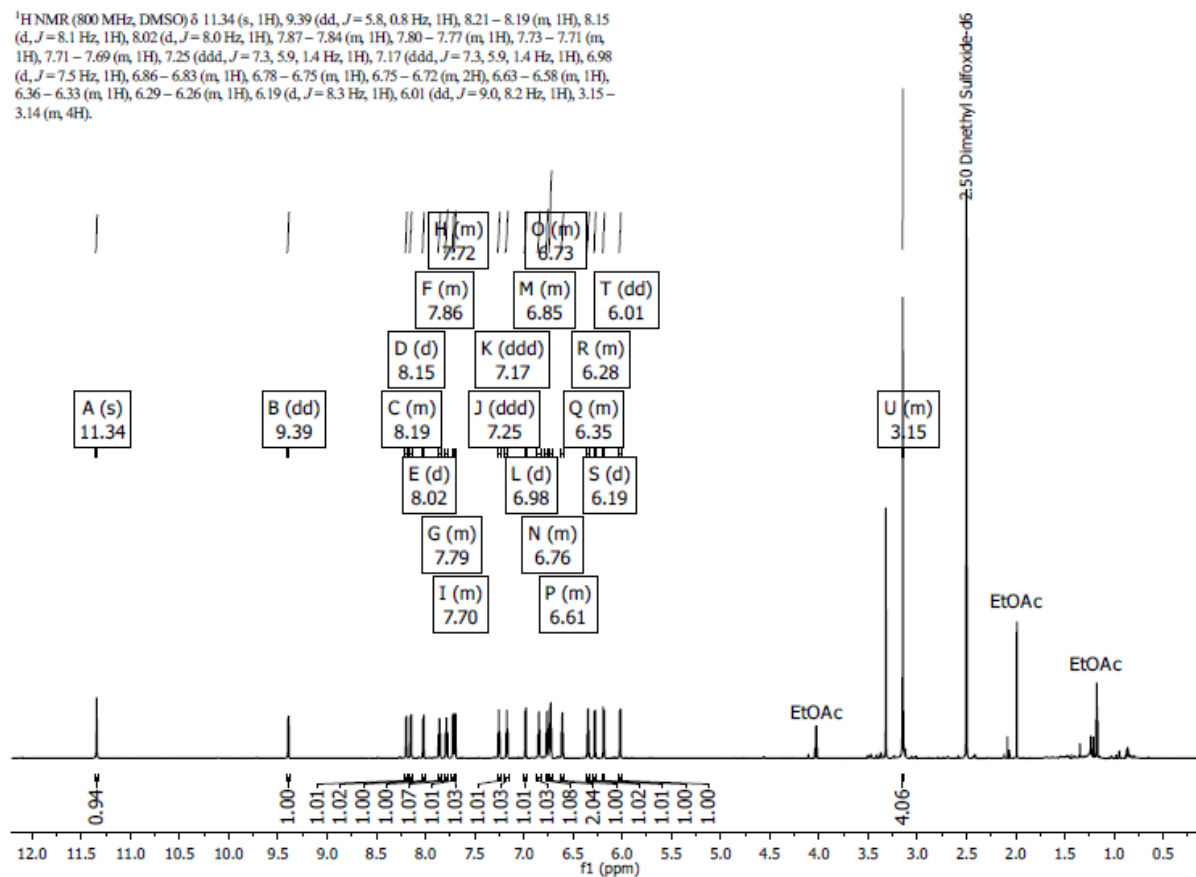

**Figure S29.** <sup>1</sup>H-NMR spectra of compound **9** (400 MHz, DMSO-*d*<sub>6</sub>) at 298K.

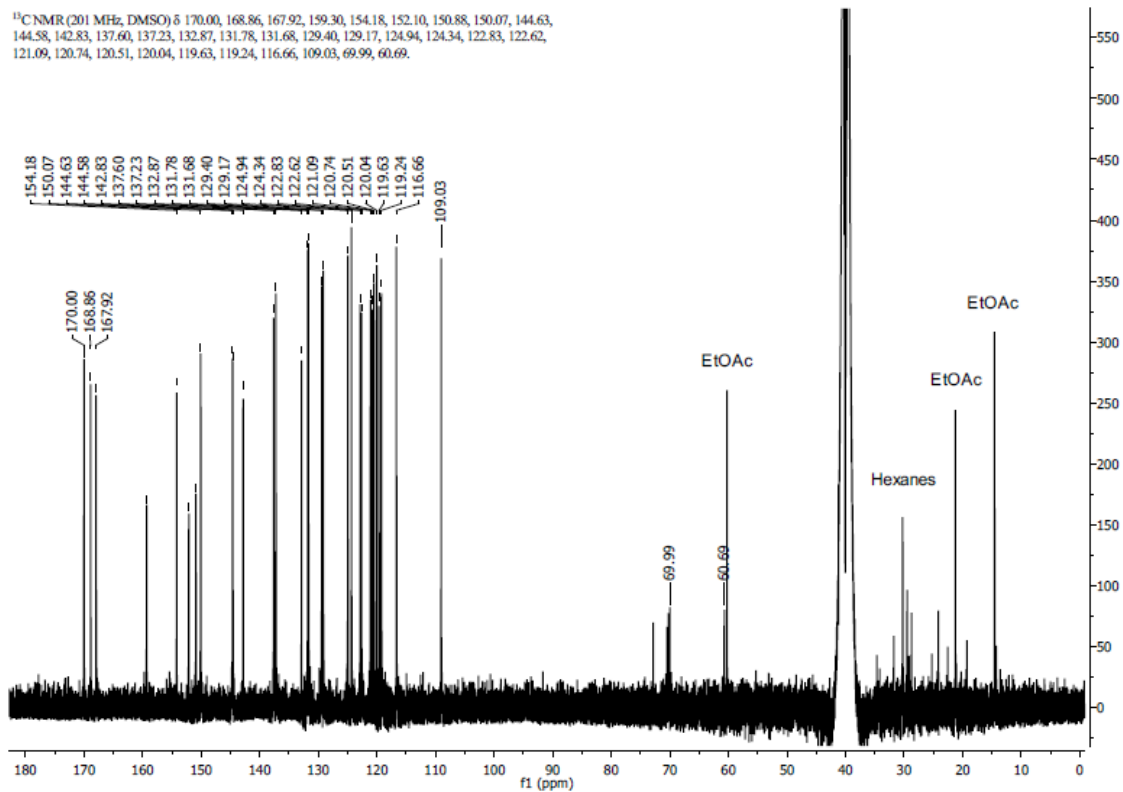

**Figure S30.** <sup>13</sup>C-NMR spectra of compound **9** (201 MHz, DMSO-*d*<sub>6</sub>) at 298K.

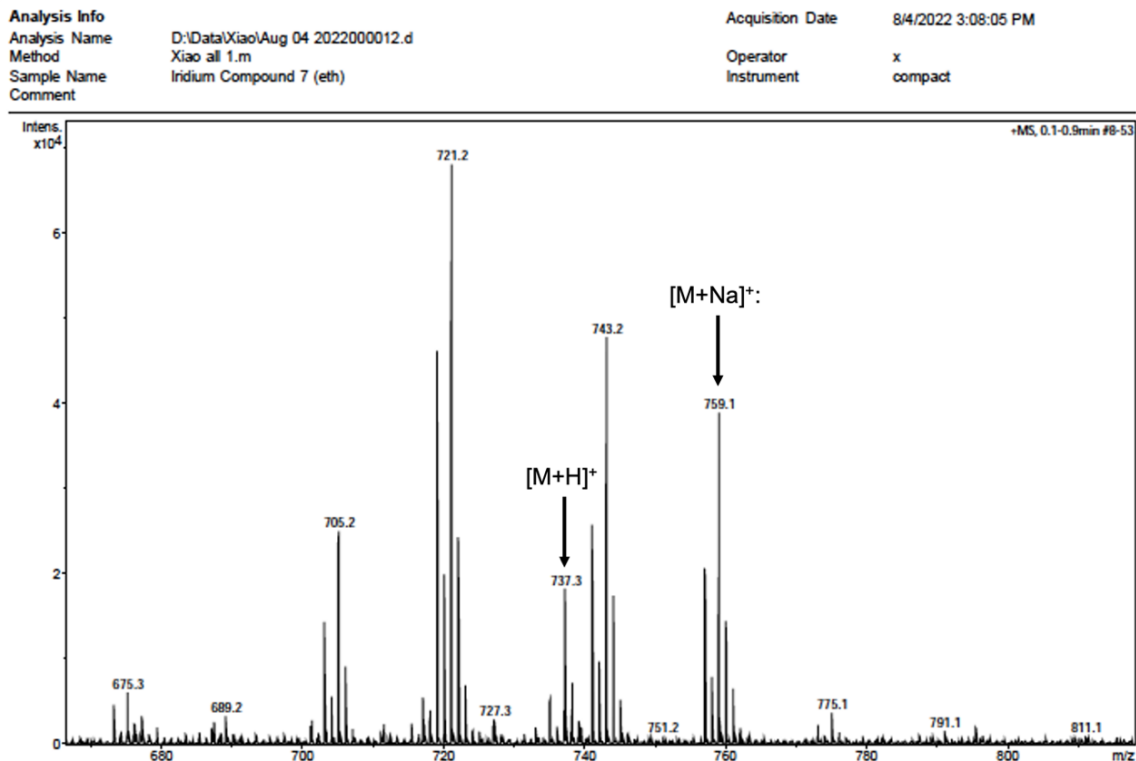

**Figure S31.** Zoomed Mass Spectroscopy spectra of compound **9**.

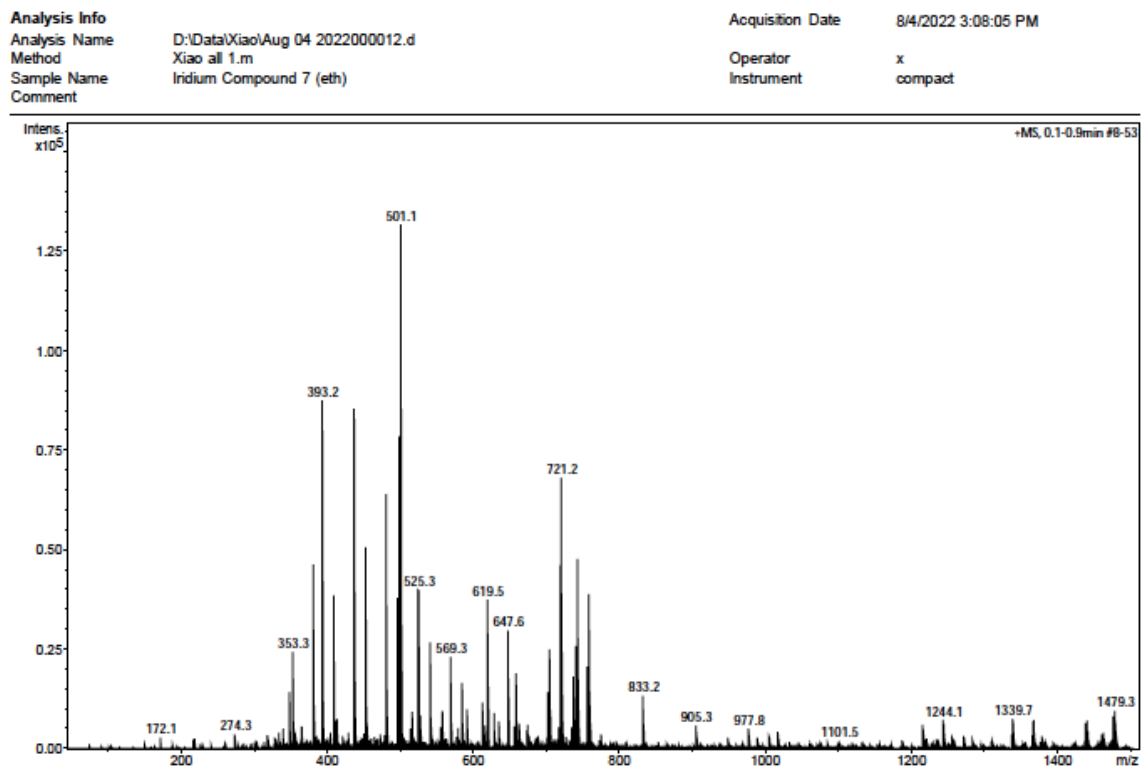

**Figure S32.** Mass Spectroscopy spectra of compound **9**.

Cyclometalated Ir(III) complex **10**:

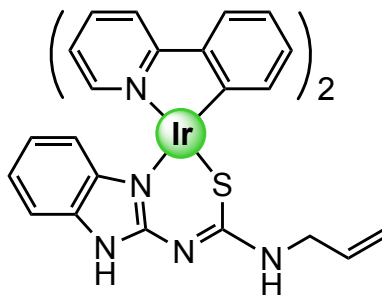

<sup>1</sup>H NMR (800 MHz, DMSO) δ 12.51 (s, 1H), 9.72 (dd, *J* = 5.7, 0.9 Hz, 1H), 8.11 (d, *J* = 8.0 Hz, 1H), 8.05 (d, *J* = 8.0 Hz, 1H), 7.99 (dd, *J* = 5.7, 0.7 Hz, 1H), 7.91 (s, 1H), 7.89 – 7.86 (m, 1H), 7.85 – 7.82 (m, 1H), 7.69 – 7.66 (m, 2H), 7.35 (ddd, *J* = 7.3, 5.8, 1.4 Hz, 1H), 7.23 (ddd, *J* = 7.3, 5.8, 1.4 Hz, 1H), 7.11 – 7.09 (m, 1H), 6.82 – 6.80 (m, 1H), 6.74 – 6.71 (m, 2H), 6.71 – 6.68 (m, 1H), 6.62 – 6.59 (m, 1H), 6.16 (dd, *J* = 7.7, 0.9 Hz, 1H), 6.05 (dd, *J* = 7.6, 0.9 Hz, 1H), 2.79 – 2.76 (m, 2H).

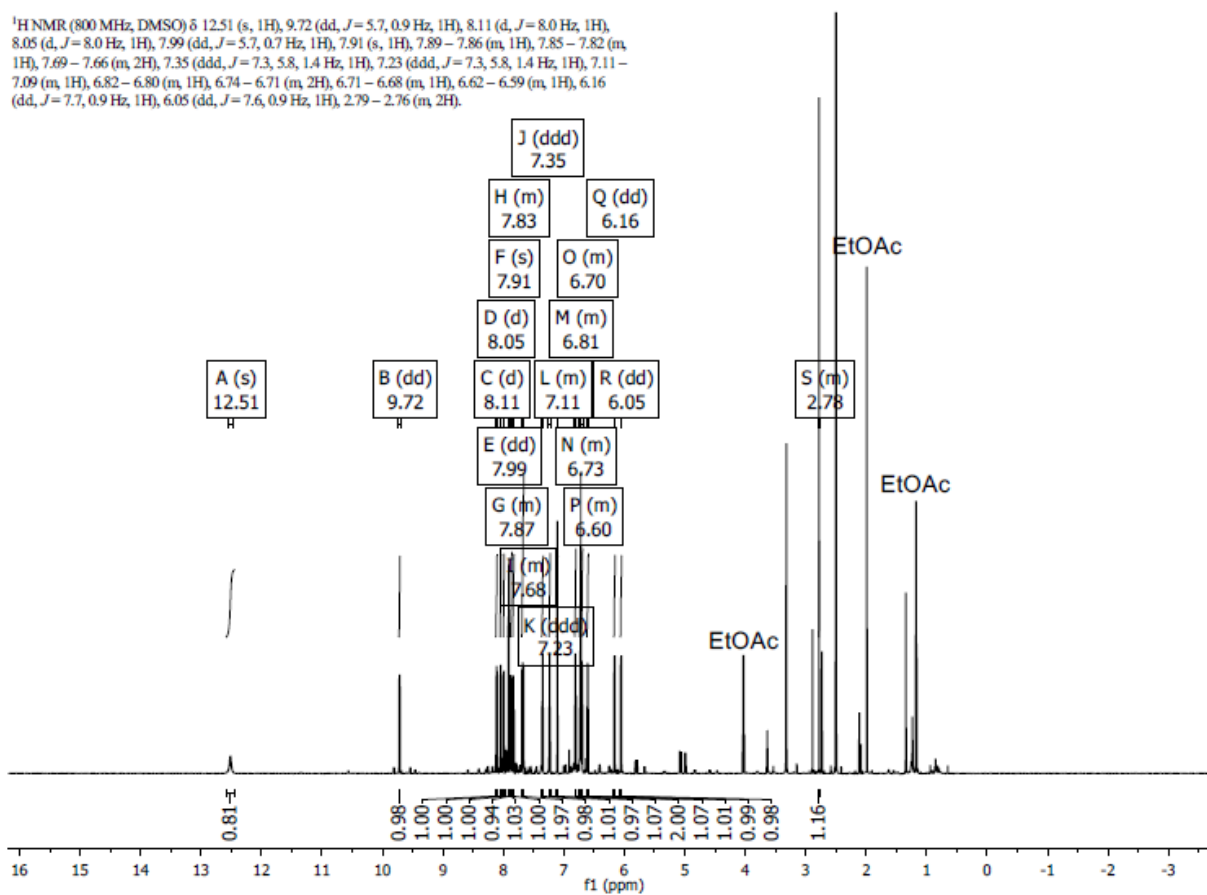

**Figure S33.** <sup>1</sup>H-NMR spectra of compound **10** (800 MHz, DMSO-*d*<sub>6</sub>) at 298K.

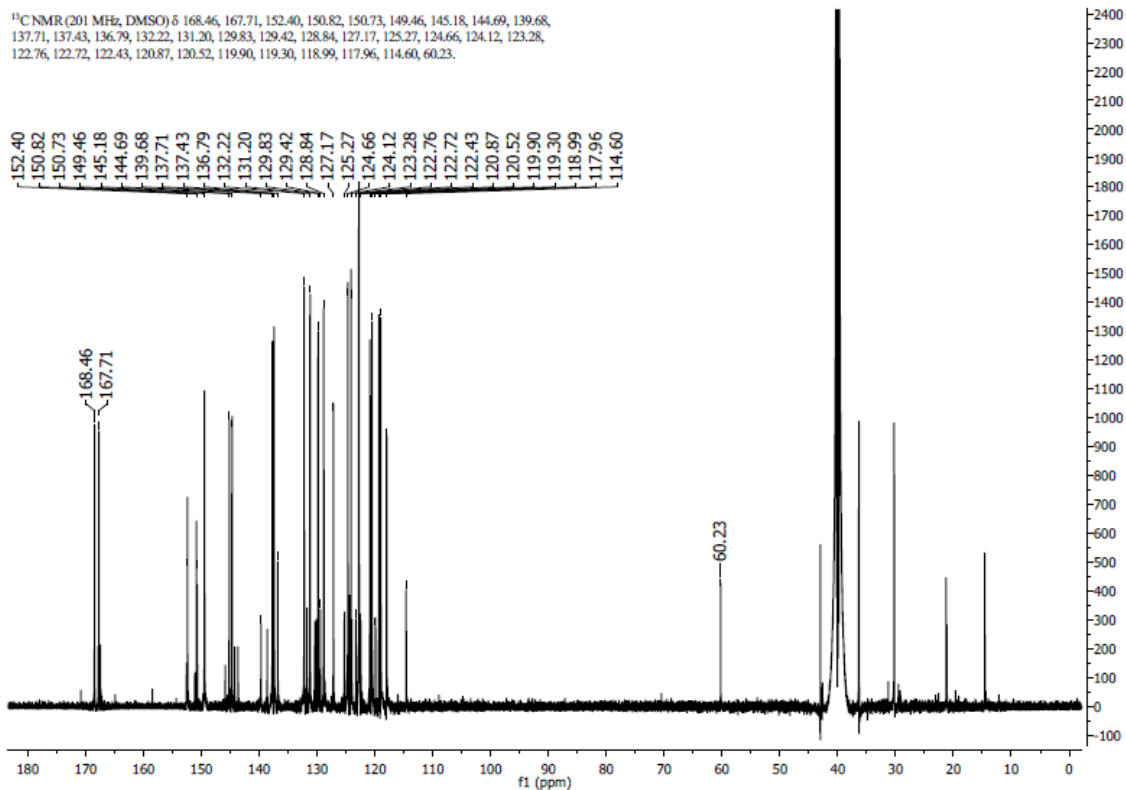

**Figure S34.** <sup>13</sup>C-NMR spectra of compound **10** (201 MHz, DMSO-*d*<sub>6</sub>) at 298K.

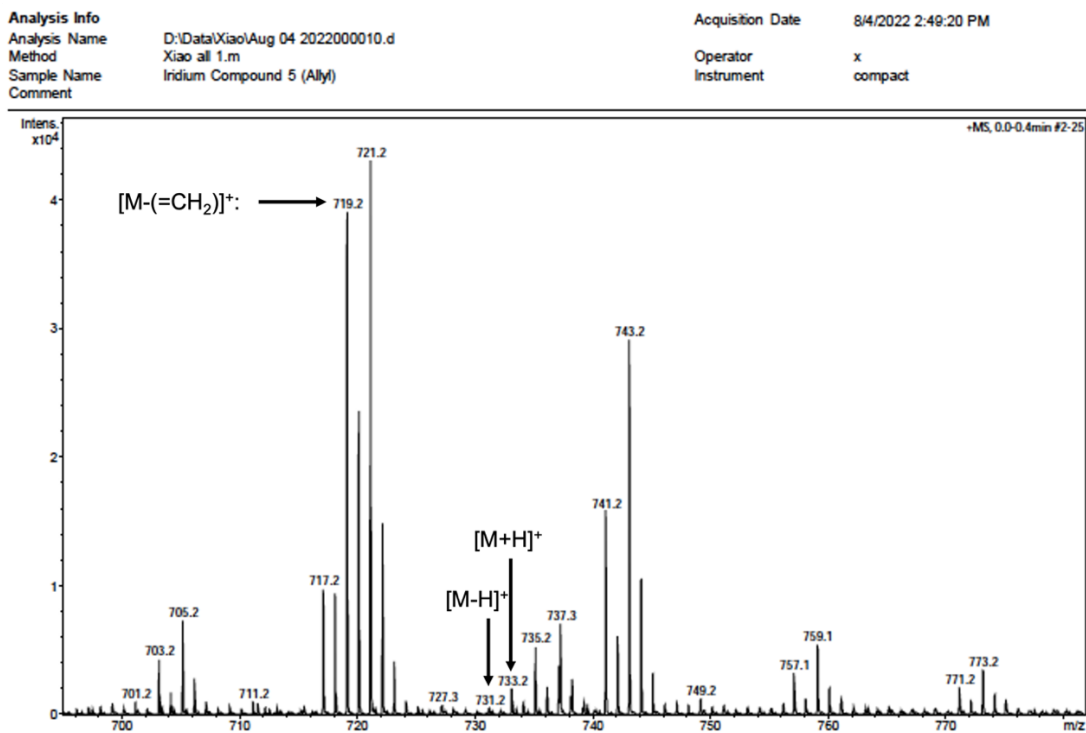

**Figure S35.** Zoomed Mass Spectrometry spectra of compound **10**.

Analysis Info  
Analysis Name D:\Data\Xiao\Aug 04 2022\000010.d  
Method Xiao all 1.m  
Sample Name Iridium Compound 5 (Allyl)  
Comment

Acquisition Date 8/4/2022 2:49:20 PM  
Operator x  
Instrument compact

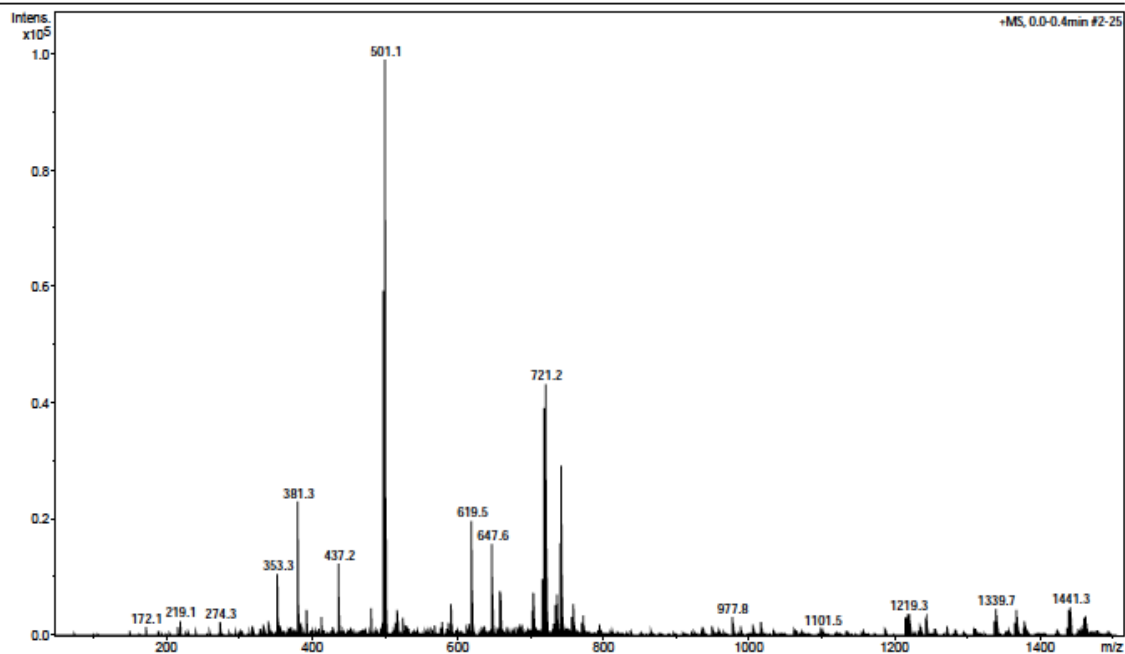

Figure S36. Mass Spectroscopy spectra of compound 10.



Cyclometalated Ir(III) complex **11**:

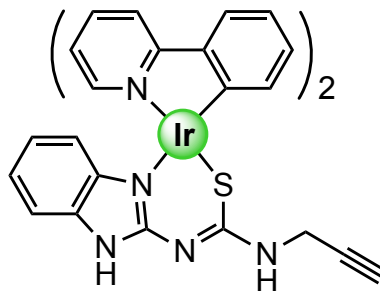

<sup>1</sup>H-NMR (400 MHz, dms<sub>o</sub>) δ 11.34 (s, 1H), 9.40 (d, *J* = 5.8 Hz, 1H), 8.20 (d, *J* = 5.7 Hz, 1H), 8.15 (d, *J* = 8.2 Hz, 1H), 8.03 (d, *J* = 8.2 Hz, 1H), 7.90 – 7.83 (m, 1H), 7.82 – 7.76 (m, 1H), 7.74 – 7.68 (m, 2H), 7.25 (ddd, *J* = 5.9, 3.7, 1.2 Hz, 1H), 7.21 – 7.15 (m, 1H), 6.98 (d, *J* = 7.8 Hz, 1H), 6.88 – 6.82 (m, 1H), 6.79 – 6.70 (m, 3H), 6.64 – 6.58 (m, 1H), 6.38 – 6.32 (m, 1H), 6.28 (d, *J* = 7.6 Hz, 1H), 6.19 (d, *J* = 8.3 Hz, 1H), 6.05 – 6.00 (m, 1H), 3.15 (s, 2H), 1.99 (s, 1H).

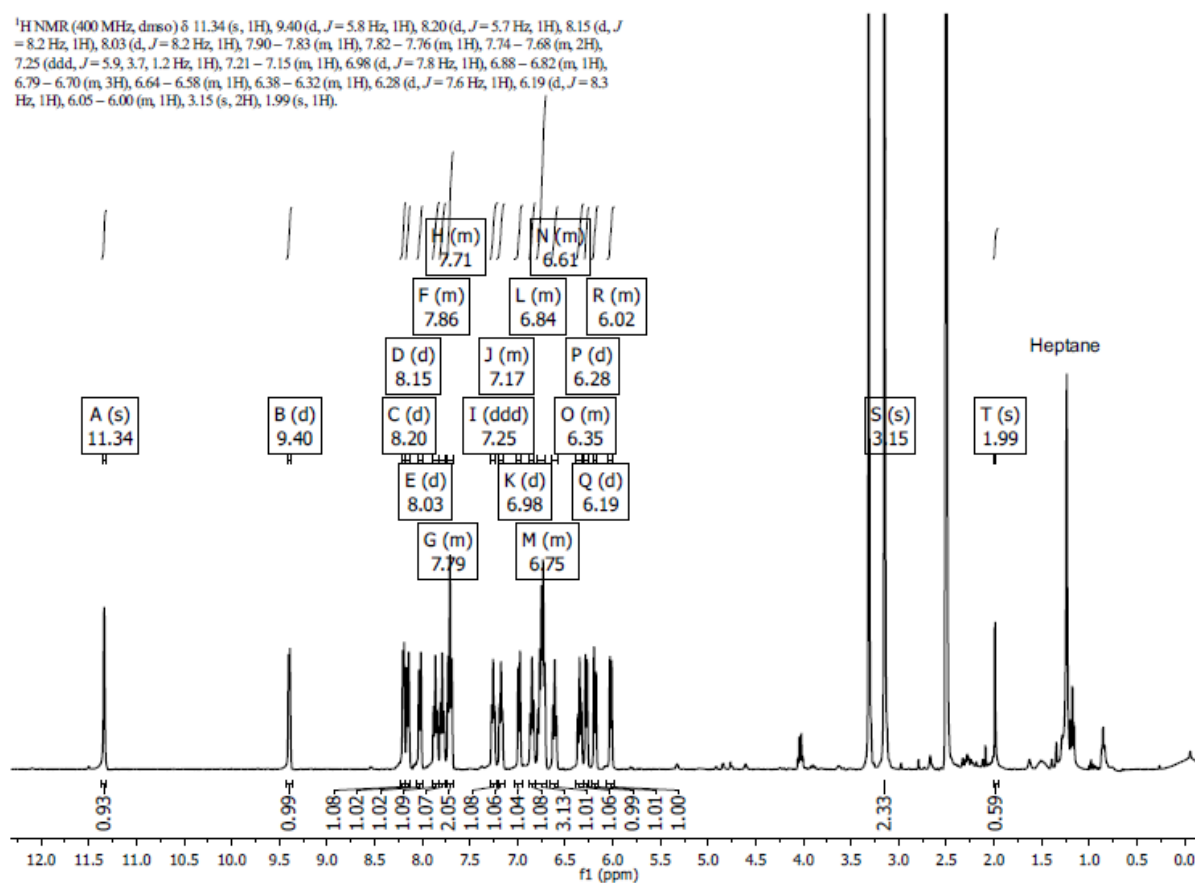

**Figure S37.** <sup>1</sup>H-NMR spectra of compound **11** (400 MHz, DMSO-*d*<sub>6</sub>) at 298K.

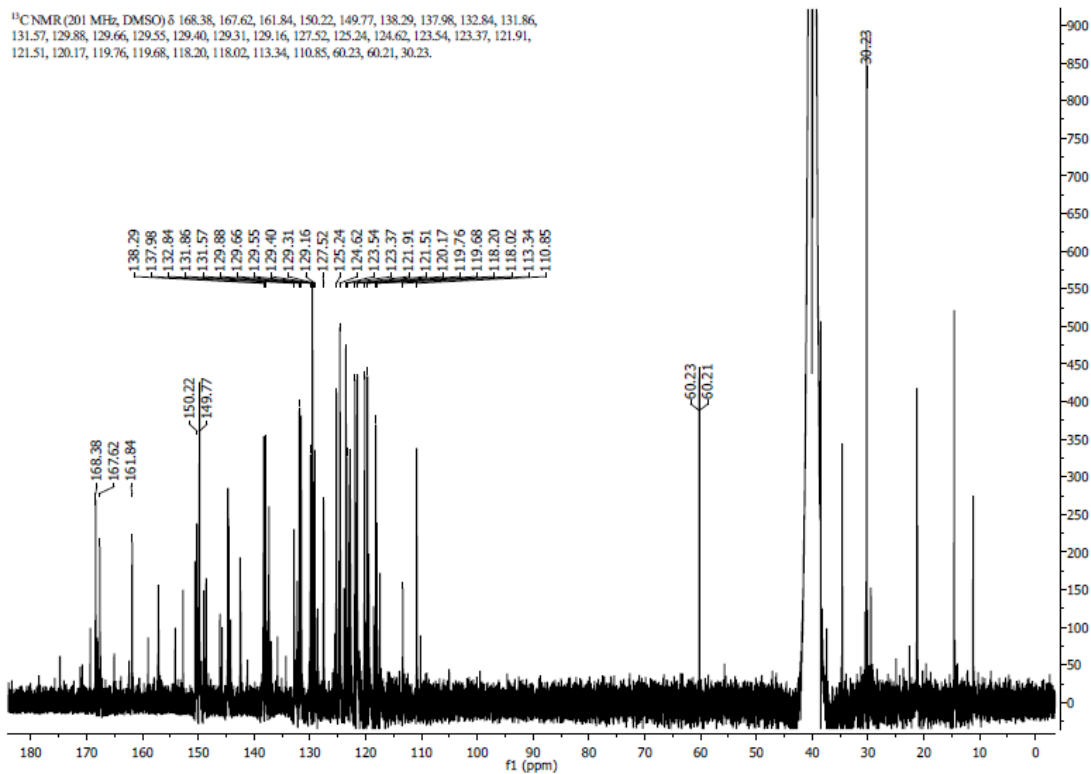

**Figure S38.** <sup>13</sup>C-NMR spectra of compound **11** (201 MHz, DMSO-*d*<sub>6</sub>) at 298K.

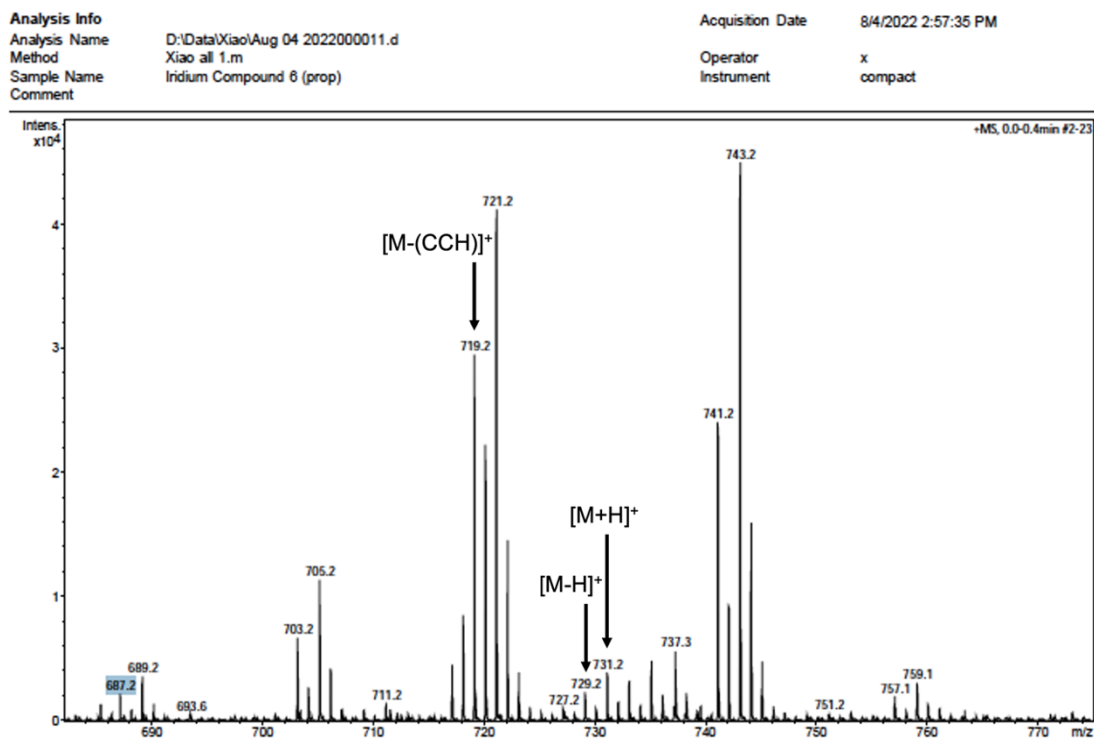

**Figure S39.** Zoomed Mass Spectroscopy spectra of compound **11**.

Analysis Info  
Analysis Name D:\Data\Xiao\Aug 04 2022\000011.d  
Method Xiao all 1.m  
Sample Name Iridium Compound 6 (prop)  
Comment

Acquisition Date 8/4/2022 2:57:35 PM  
Operator x  
Instrument compact

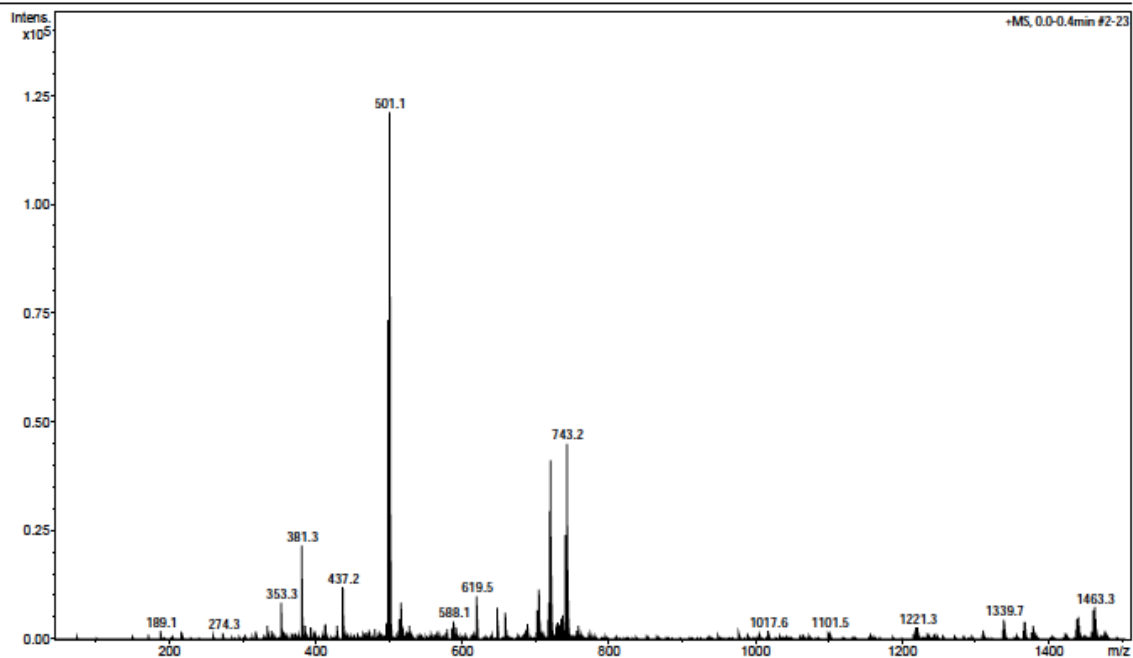

Figure S40. Mass Spectroscopy spectra of compound 11.

#### SIV. UV-Vis, Excitation and Emission Data

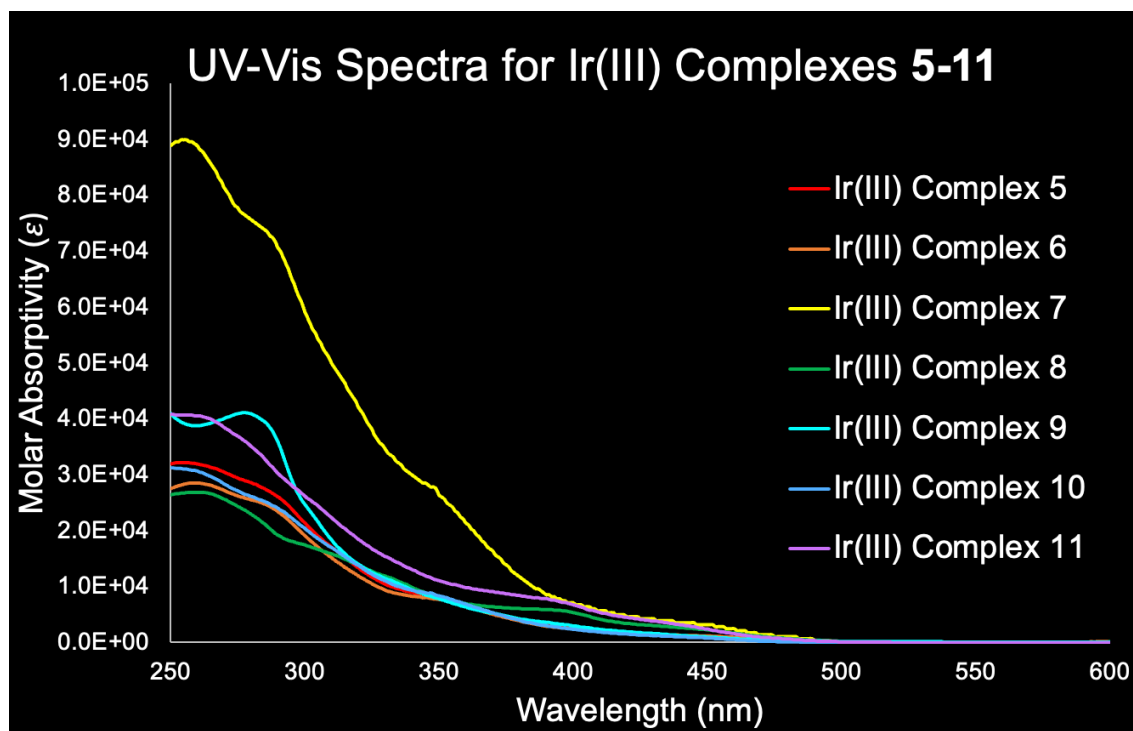

**Figure S41.** UV-Vis spectra of heteroleptic cyclometalated Ir(III) complexes **5-11** (10  $\mu$ M,  $\text{CHCl}_3$ , 298 K).

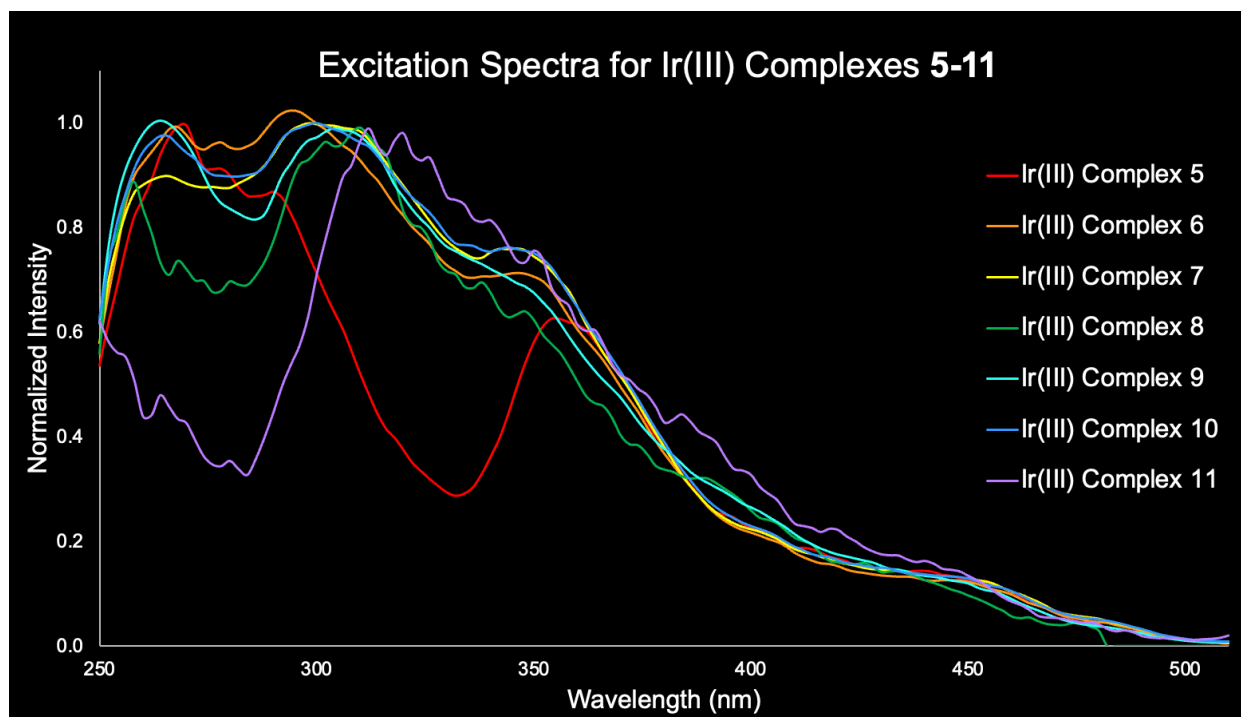

**Figure S42.** Normalized excitation spectra of heteroleptic cyclometalated Ir(III) complexes **5-11**; in  $\text{CHCl}_3$  degassed for 1 min ( $\text{N}_2$ ) at 298 K.

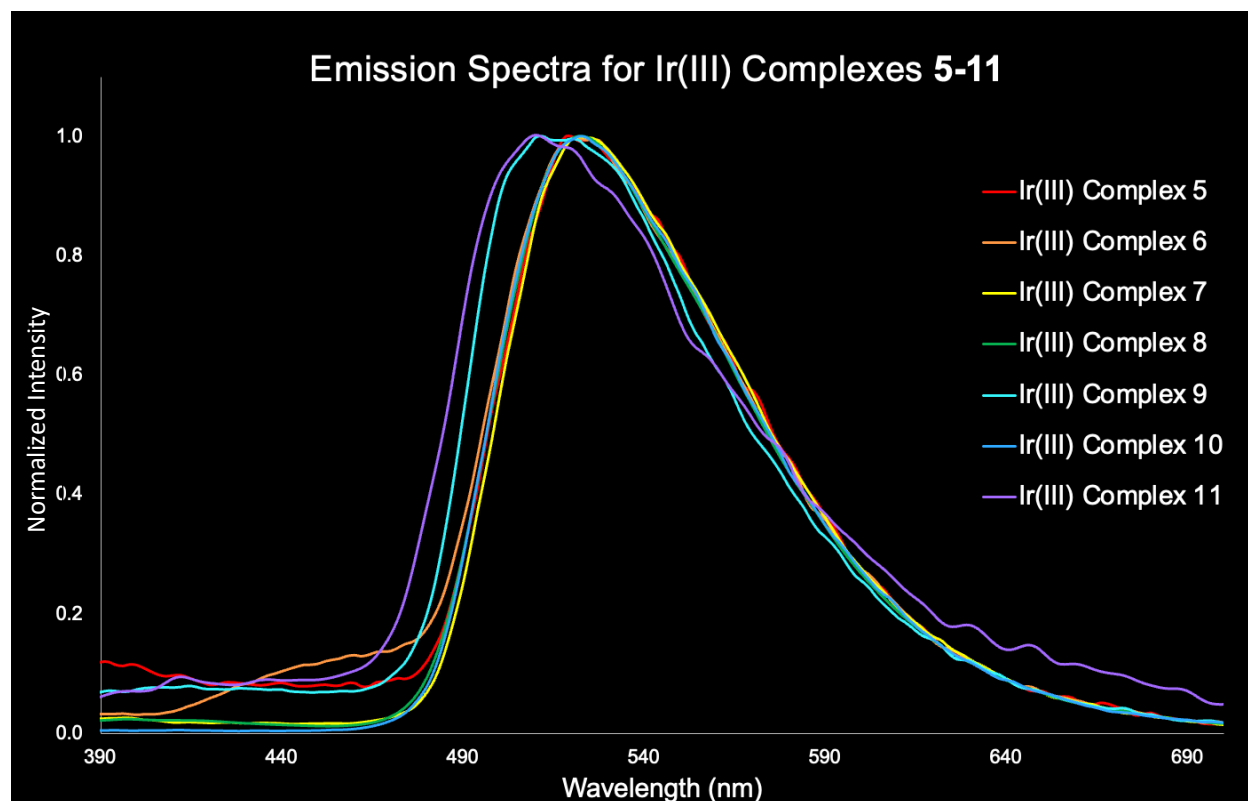

**Figure S43.** Normalized emission spectra of heteroleptic cyclometallated Ir(III) complexes **5-11**; in  $\text{CHCl}_3$  degassed for 1 min ( $\text{N}_2$ ) at 298 K. Compound **6** exhibits a secondary emission that we attribute to charge transfer interaction from the phenylalanine moiety. Compound **11** shows extended emission out to 700 nm for which we attribute to a contribution from the alkynyl functionality that is present in this structure.

## SV. PLQYs and Decay Lifetimes

**Table S5.** Solution-state photophysical data for iridium(III) compounds **5-11**.

| Ir(III)<br>Complex | Excitation<br>Maxima<br>(nm) <sup>a</sup> | Emission<br>Maxima<br>(nm) <sup>a</sup> | PLQY<br>(%) <sup>b</sup> | Lifetime<br>$\tau_{\text{PL}}$ ( $\mu\text{s}$ ), $\chi^2$ <sup>c,d</sup> | $k_r$<br>( $\times 10^5 \text{ s}^{-1}$ ) <sup>e</sup> | $k_{\text{nr}}$<br>( $\times 10^5 \text{ s}^{-1}$ ) <sup>e</sup> |
|--------------------|-------------------------------------------|-----------------------------------------|--------------------------|---------------------------------------------------------------------------|--------------------------------------------------------|------------------------------------------------------------------|
| <b>5</b>           | 268                                       | 524                                     | 38                       | 0.90, 1.03 (99%)                                                          | 4.3                                                    | 6.8                                                              |
| <b>6</b>           | 298                                       | 524                                     | 30                       | 1.0, 1.29                                                                 | 3.0                                                    | 6.9                                                              |
| <b>7</b>           | 300                                       | 524                                     | 39                       | 1.0, 1.05                                                                 | 3.8                                                    | 5.8                                                              |
| <b>8</b>           | 312                                       | 500                                     | 2.0                      | 1.3, 1.13 (94%)                                                           | 1.7                                                    | 7.3                                                              |
| <b>9</b>           | 306                                       | 524                                     | 22                       | 1.1, 1.02 (99%)                                                           | 2.0                                                    | 7.0                                                              |
| <b>10</b>          | 306                                       | 520                                     | 24                       | 0.98, 1.02 (97%)                                                          | 3.5                                                    | 6.8                                                              |
| <b>11</b>          | 312                                       | 510                                     | 6.7                      | 1.1, 1.09 (95%)                                                           | 6.1                                                    | 8.5                                                              |

**a)** Excitation and emission maxima for Ir(III) complexes **5-11**; in  $\text{CHCl}_3$  degassed for 1 min ( $\text{N}_2$ ) at 298 K. **b)** PLQYs for Ir(III) complexes **5-11**; in  $\text{CHCl}_3$  degassed for 20 mins (Ar) at 298 K determined using the relative method with quinine sulfate in 0.1 M  $\text{H}_2\text{SO}_4$  as a reference ( $\phi_{\text{PL}}=54.6\%$ ). **c)** decay lifetimes using TCSPC excited at 365 nm and their corresponding chi-squared values for Ir(III) complexes **5-11**; in  $\text{CHCl}_3$  degassed for 20 mins (Ar) at 298 K; **d)** complexes **5, 8, 9, 10**, and **11** decay biexponentially - values with % were major contributor of a biexponential decay - secondary minor components are presented in individual fits below; **e)** the radiative ( $k_r$ ) and nonradiative ( $k_{\text{nr}}$ ) rate constants were calculated as  $k_r = \phi_{\text{PL}}/\tau_{\text{PL}}$  and  $k_{\text{nr}} = (1-\phi_{\text{PL}})/\tau_{\text{PL}}$ .

| Table 1: Data Concerning the Standard |                     |          |          | Table 2: Data Concerning the Sample |                   |          |          |
|---------------------------------------|---------------------|----------|----------|-------------------------------------|-------------------|----------|----------|
| Stock solution reference              | Quinine Sulfate     |          |          | Sample Structure                    | Compound 5        |          |          |
| Solvent                               | 0.1 M Sulfuric Acid |          |          | Solvent                             | CHCl <sub>3</sub> |          |          |
| Refractive Index                      | 1.33                |          |          | Refractive Index                    | 1.445             |          |          |
| Wavelength used (nm)                  | 350                 |          |          | Wavelength used (nm)                | 350               |          |          |
| Run                                   | 1                   | 2        | 3        | Run                                 | 1                 | 2        | 3        |
| Volume of Mother solution (mL)        | 3                   | 3        | 3        | Volume of Mother solution (mL)      | 3.05              | 3.05     | 3.05     |
| Theoretical Abs (optical)             | 0.078               | 0.078    | 0.078    | Degassed 1 minute                   | 0.05              | 0.05     | 0.05     |
| Theoretical Abs (average)             | 0.078               |          |          | Total Volume (mL)                   | 3                 | 3        | 3        |
| Emission Integral                     | 5.47E+07            | 5.26E+07 | 5.13E+07 | Theoretical Abs (optical)           | 0.066             | 0.067    | 0.066    |
| Emission Integral (average)           | 5.29E+07            |          |          | Theoretical Abs (average)           | 0.066333333       |          |          |
| Standard Quantum Yield (%)            | 54.6                |          |          | Emission Integral                   | 2.85E+07          | 2.67E+07 | 2.59E+07 |
| Values needed to be plugged in        |                     |          |          | Emission Integral (average)         | 2.70E+07          |          |          |
|                                       |                     |          |          | Calculated QY (%)                   | 38.67             |          |          |

Integration taken from 450-700

**Table S6.** PLQY of Ir(III) complex **5**; in CHCl<sub>3</sub> degassed for 20 mins (Ar) at 298 K,  $\lambda_{\text{ex}} = 350 \text{ nm}$ .

| Table 1: Data Concerning the Standard |                     |          |          | Table 2: Data Concerning the Sample |                   |          |          |
|---------------------------------------|---------------------|----------|----------|-------------------------------------|-------------------|----------|----------|
| Stock solution reference              | Quinine Sulfate     |          |          | Sample Structure                    | Compound 6        |          |          |
| Solvent                               | 0.1 M Sulfuric Acid |          |          | Solvent                             | CHCl <sub>3</sub> |          |          |
| Refractive Index                      | 1.33                |          |          | Refractive Index                    | 1.445             |          |          |
| Wavelength used (nm)                  | 350                 |          |          | Wavelength used (nm)                | 350               |          |          |
| Run                                   | 1                   | 2        | 3        | Run                                 | 1                 | 2        | 3        |
| Volume of Mother solution (mL)        | 3                   | 3        | 3        | Volume of Mother solution (mL)      | 3.05              | 3.05     | 3.05     |
| Theoretical Abs (optical)             | 0.074               | 0.075    | 0.075    | Degassed 1 minute                   | 0.05              | 0.05     | 0.05     |
| Theoretical Abs (average)             | 0.074666667         |          |          | Total Volume (mL)                   | 3                 | 3        | 3        |
| Emission Integral                     | 4.65E+07            | 4.70E+07 | 4.76E+07 | Theoretical Abs (optical)           | 0.09              | 0.091    | 0.09     |
| Emission Integral (average)           | 4.70E+07            |          |          | Theoretical Abs (average)           | 0.090333333       |          |          |
| Standard Quantum Yield (%)            | 54.6                |          |          | Emission Integral                   | 2.81E+07          | 2.66E+07 | 2.58E+07 |
| Values needed to be plugged in        |                     |          |          | Emission Integral (average)         | 2.69E+07          |          |          |
|                                       |                     |          |          | Calculated QY (%)                   | 30.43             |          |          |

Integration taken from 450-700

**Table S7.** PLQY of Ir(III) complex **6**; in CHCl<sub>3</sub> degassed for 20 mins (Ar) at 298 K,  $\lambda_{\text{ex}} = 350 \text{ nm}$ .

| Table 1: Data Concerning the Standard |                     |          |          | Table 2: Data Concerning the Sample |                   |          |          |
|---------------------------------------|---------------------|----------|----------|-------------------------------------|-------------------|----------|----------|
| Stock solution reference              | Quinine Sulfate     |          |          | Sample Structure                    | Compound 7        |          |          |
| Solvent                               | 0.1 M Sulfuric Acid |          |          | Solvent                             | CHCl <sub>3</sub> |          |          |
| Refractive Index                      | 1.33                |          |          | Refractive Index                    | 1.445             |          |          |
| Wavelength used (nm)                  | 350                 |          |          | Wavelength used (nm)                | 350               |          |          |
| Run                                   | 1                   | 2        | 3        | Run                                 | 1                 | 2        | 3        |
| Volume of Mother solution (mL)        | 3                   | 3        | 3        | Volume of Mother solution (mL)      | 3.05              | 3.05     | 3.05     |
| Theoretical Abs (optical)             | 0.075               | 0.076    | 0.076    | Total Volume (mL)                   | 3                 | 3        | 3        |
| Theoretical Abs (average)             | 0.075666667         |          |          | Theoretical Abs (optical)           | 0.073             | 0.073    | 0.074    |
| Emission Integral                     | 4.50E+07            | 4.42E+07 | 4.37E+07 | Theoretical Abs (average)           | 0.073333333       |          |          |
| Emission Integral (average)           | 4.43E+07            |          |          | Emission Integral                   | 2.79E+07          | 2.59E+07 | 2.45E+07 |
| Standard Quantum Yield (%)            | 54.6                |          |          | Emission Integral (average)         | 2.61E+07          |          |          |
| Values needed to be plugged in        |                     |          |          | Calculated QY (%)                   | 39.19             |          |          |
|                                       |                     |          |          |                                     |                   |          |          |

Integration taken from 450-700

**Table S8.** PLQY of Ir(III) complex **7**; in CHCl<sub>3</sub> degassed for 20 mins (Ar) at 298 K,  $\lambda_{\text{ex}} = 350 \text{ nm}$ .



| Table 1: Data Concerning the Standard |                     |          |          |
|---------------------------------------|---------------------|----------|----------|
| Stock solution reference              | Quinine Sulfate     |          |          |
| Solvent                               | 0.1 M Sulfuric Acid |          |          |
| Refractive Index                      | 1.33                |          |          |
| Wavelength used (nm)                  | 350                 |          |          |
| Run                                   | 1                   | 2        | 3        |
| Volume of Mother solution (mL)        | 3                   | 3        | 3        |
| Theoretical Abs (optical)             | 0.074               | 0.075    | 0.075    |
| Theoretical Abs (average)             | 0.074666667         |          |          |
| Emission Integral                     | 4.65E+07            | 4.70E+07 | 4.76E+07 |
| Emission Integral (average)           | 4.70E+07            |          |          |
| Standard Quantum Yield (%)            | 54.6                |          |          |
| Values needed to be plugged in        |                     |          |          |

| Table 2: Data Concerning the Sample |                   |          |          |
|-------------------------------------|-------------------|----------|----------|
| Sample Structure                    | Compound 8        |          |          |
| Solvent                             | CHCl <sub>3</sub> |          |          |
| Refractive Index                    | 1.445             |          |          |
| Wavelength used (nm)                | 350               |          |          |
| Run                                 | 1                 | 2        | 3        |
| Volume of Mother solution (mL)      | 3.05              | 3.05     | 3.05     |
| Degassed 1 minute                   | 0.05              | 0.05     | 0.05     |
| Total Volume (mL)                   | 3                 | 3        | 3        |
| Theoretical Abs (optical)           | 0.082             | 0.083    | 0.082    |
| Theoretical Abs (average)           | 0.082333333       |          |          |
| Emission Integral                   | 1.83E+06          | 1.75E+06 | 1.79E+06 |
| Emission Integral (average)         | 1.79E+06          |          |          |
| Calculated QY (%)                   | 2.22              |          |          |

Integration taken from 450-700

**Table S9.** PLQY of Ir(III) complex **8**; in CHCl<sub>3</sub> degassed for 20 mins (Ar) at 298 K,

$\lambda_{\text{ex}} = 350 \text{ nm}$ .

| Table 1: Data Concerning the Standard |                     |          |          |
|---------------------------------------|---------------------|----------|----------|
| Stock solution reference              | Quinine Sulfate     |          |          |
| Solvent                               | 0.1 M Sulfuric Acid |          |          |
| Refractive Index                      | 1.33                |          |          |
| Wavelength used (nm)                  | 350                 |          |          |
| Run                                   | 1                   | 2        | 3        |
| Volume of Mother solution (mL)        | 3                   | 3        | 3        |
| Theoretical Abs (optical)             | 0.075               | 0.076    | 0.076    |
| Theoretical Abs (average)             | 0.075666667         |          |          |
| Emission Integral                     | 4.50E+07            | 4.42E+07 | 4.37E+07 |
| Emission Integral (average)           | 4.43E+07            |          |          |
| Standard Quantum Yield (%)            | 54.6                |          |          |
| Values needed to be plugged in        |                     |          |          |

| Table 2: Data Concerning the Sample |                   |          |          |
|-------------------------------------|-------------------|----------|----------|
| Sample Structure                    | Compound 9        |          |          |
| Solvent                             | CHCl <sub>3</sub> |          |          |
| Refractive Index                    | 1.445             |          |          |
| Wavelength used (nm)                | 350               |          |          |
| Run                                 | 1                 | 2        | 3        |
| Volume of Mother solution (mL)      | 3.05              | 3.05     | 3.05     |
| Degassed 1 minute                   | 0.05              | 0.05     | 0.05     |
| Total Volume (mL)                   | 3                 | 3        | 3        |
| Theoretical Abs (optical)           | 0.068             | 0.068    | 0.068    |
| Theoretical Abs (average)           | 0.068             |          |          |
| Emission Integral                   | 1.41E+07          | 1.33E+07 | 1.36E+07 |
| Emission Integral (average)         | 1.37E+07          |          |          |
| Calculated QY (%)                   | 22.12             |          |          |

Integration taken from 450-700

**Table S10.** PLQY of Ir(III) complex **9**; in CHCl<sub>3</sub> degassed for 20 mins (Ar) at 298 K,

$\lambda_{\text{ex}} = 350 \text{ nm}$ .

| Table 1: Data Concerning the Standard |                     |          |          |
|---------------------------------------|---------------------|----------|----------|
| Stock solution reference              | Quinine Sulfate     |          |          |
| Solvent                               | 0.1 M Sulfuric Acid |          |          |
| Refractive Index                      | 1.33                |          |          |
| Wavelength used (nm)                  | 350                 |          |          |
| Run                                   | 1                   | 2        | 3        |
| Volume of Mother solution (mL)        | 3                   | 3        | 3        |
| Theoretical Abs (optical)             | 0.078               | 0.078    | 0.078    |
| Theoretical Abs (average)             | 0.078               |          |          |
| Emission Integral                     | 5.47E+07            | 5.26E+07 | 5.13E+07 |
| Emission Integral (average)           | 5.29E+07            |          |          |
| Standard Quantum Yield (%)            | 54.6                |          |          |
| Values needed to be plugged in        |                     |          |          |

| Table 2: Data Concerning the Sample |                   |          |          |
|-------------------------------------|-------------------|----------|----------|
| Sample Structure                    | Compound 10       |          |          |
| Solvent                             | CHCl <sub>3</sub> |          |          |
| Refractive Index                    | 1.445             |          |          |
| Wavelength used (nm)                | 350               |          |          |
| Run                                 | 1                 | 2        | 3        |
| Volume of Mother solution (mL)      | 3.05              | 3.05     | 3.05     |
| Degassed 1 minute                   | 0.05              | 0.05     | 0.05     |
| Total Volume (mL)                   | 3                 | 3        | 3        |
| Theoretical Abs (optical)           | 0.052             | 0.052    | 0.052    |
| Theoretical Abs (average)           | 0.052             |          |          |
| Emission Integral                   | 1.92E+07          | 1.83E+07 | 1.75E+07 |
| Emission Integral (average)         | 1.83E+07          |          |          |
| Calculated QY (%)                   | 33.50             |          |          |

Integration taken from 450-700

**Table S11.** PLQY of Ir(III) complex **10**; in CHCl<sub>3</sub> degassed for 20 mins (Ar) at 298 K,

$\lambda_{\text{ex}} = 350 \text{ nm}$ .

| Table 1: Data Concerning the Standard |                     |          |          | Table 2: Data Concerning the Sample |                   |          |          |
|---------------------------------------|---------------------|----------|----------|-------------------------------------|-------------------|----------|----------|
| Stock solution reference              | Quinine Sulfate     |          |          | Sample Structure                    | Compound 11       |          |          |
| Solvent                               | 0.1 M Sulfuric Acid |          |          | Solvent                             | CHCl <sub>3</sub> |          |          |
| Refractive Index                      | 1.33                |          |          | Refractive Index                    | 1.445             |          |          |
| Wavelength used (nm)                  | 350                 |          |          | Wavelength used (nm)                | 350               |          |          |
| Run                                   | 1                   | 2        | 3        | Run                                 | 1                 | 2        | 3        |
| Volume of Mother solution (mL)        | 3                   | 3        | 3        | Volume of Mother solution (mL)      | 3.05              | 3.05     | 3.05     |
| Theoretical Abs (optical)             | 0.074               | 0.075    | 0.075    | Degassed 1 minute                   | 0.05              | 0.05     | 0.05     |
| Theoretical Abs (average)             | 0.074666667         |          |          | Total Volume (mL)                   | 3                 | 3        | 3        |
| Emission Integral                     | 4.65E+07            | 4.70E+07 | 4.76E+07 | Theoretical Abs (optical)           | 0.079             | 0.079    | 0.08     |
| Emission Integral (average)           | 4.70E+07            |          |          | Theoretical Abs (average)           | 0.079333333       |          |          |
| Standard Quantum Yield (%)            | 54.6                |          |          | Emission Integral                   | 5.32E+06          | 5.11E+06 | 5.05E+06 |
| Values needed to be plugged in        |                     |          |          | Emission Integral (average)         | 5.16E+06          |          |          |
|                                       |                     |          |          | Calculated QY (%)                   | 6.65              |          |          |

Integration taken from 450-700

**Table S12.** PLQY of Ir(III) complex **11**; in CHCl<sub>3</sub> degassed for 20 mins (Ar) at 298 K,  $\lambda_{\text{ex}} = 350$  nm.

## Decay Lifetime Measurement of Ir(III) complex 5

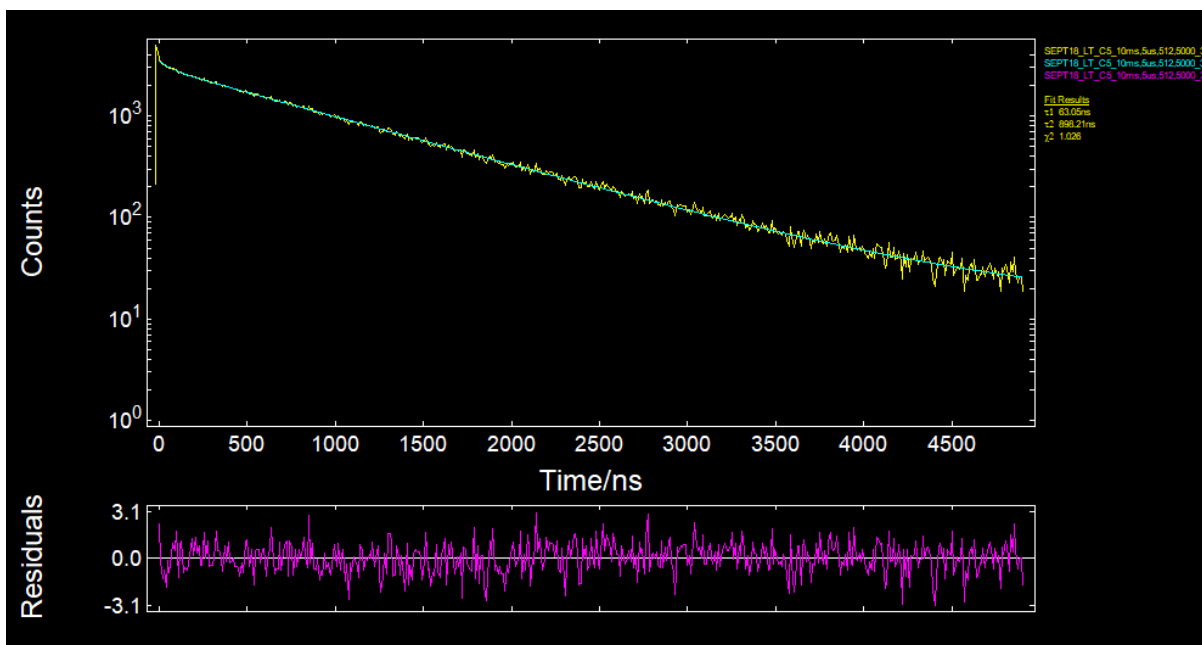

**Figure S44.** Biexponential lifetime decay of Ir(III) complex **5**,  $\sim 1 \cdot 10^{-6}$  M (Absorbance of 0.083 from UV-Vis) in  $\text{CHCl}_3$  degassed for 20 mins (Ar) at 298 K after excitation at 365 nm. Data collected at  $\lambda_{\text{max}} = 520$  nm.

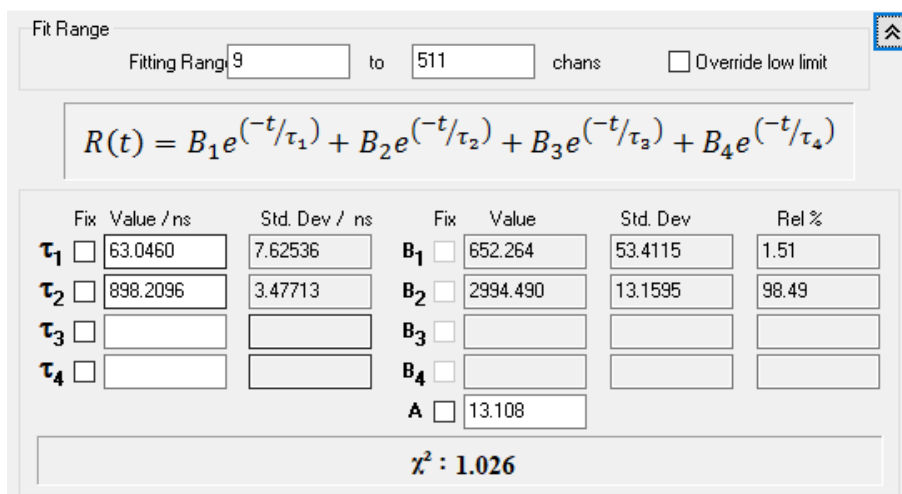

**Figure S45.** Fit result of Ir(III) complex **5**,  $\sim 1 \cdot 10^{-6}$  M (Absorbance of 0.083 from UV-Vis) in  $\text{CHCl}_3$  degassed for 20 mins (Ar) at 298 K after excitation at 365 nm. Data collected at  $\lambda_{\text{max}} = 520$  nm.

## Lifetime Measurement of Ir(III) complex 6

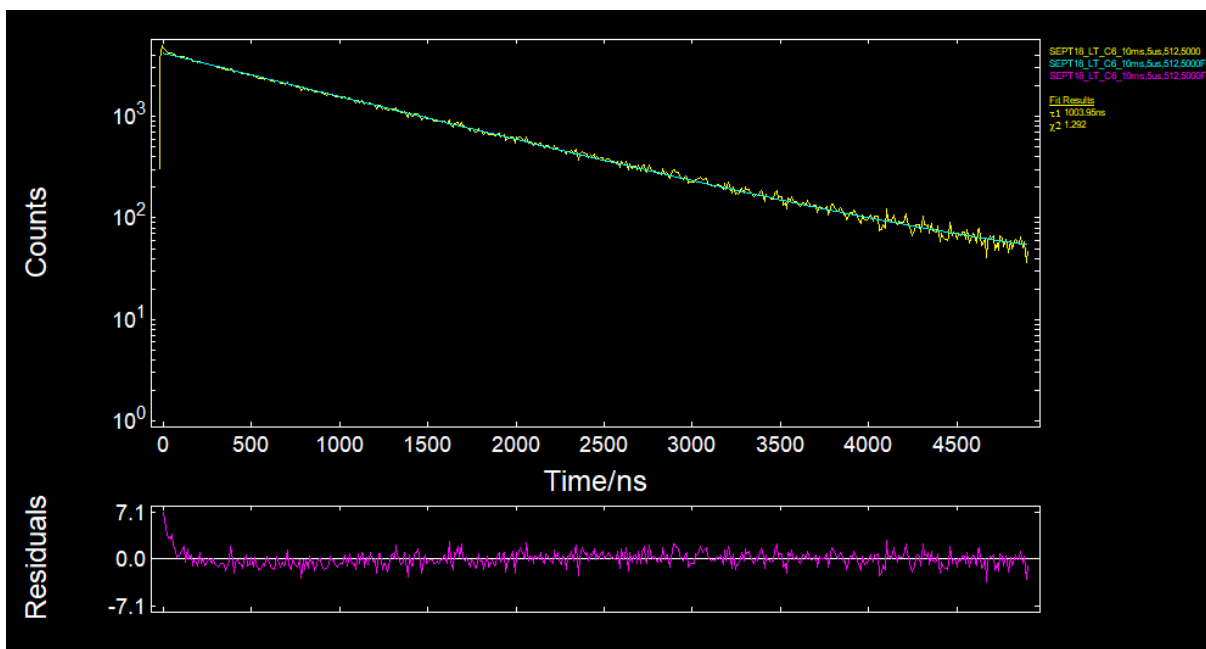

**Figure S46.** Monoexponential lifetime decay of Ir(III) complex 6,  $\sim 1 \cdot 10^{-6}$  M (Absorbance of 0.100 from UV-Vis) in  $\text{CHCl}_3$  degassed for 20 mins (Ar) at 298 K after excitation at 365 nm. Data collected at  $\lambda_{\text{max}} = 520$  nm.

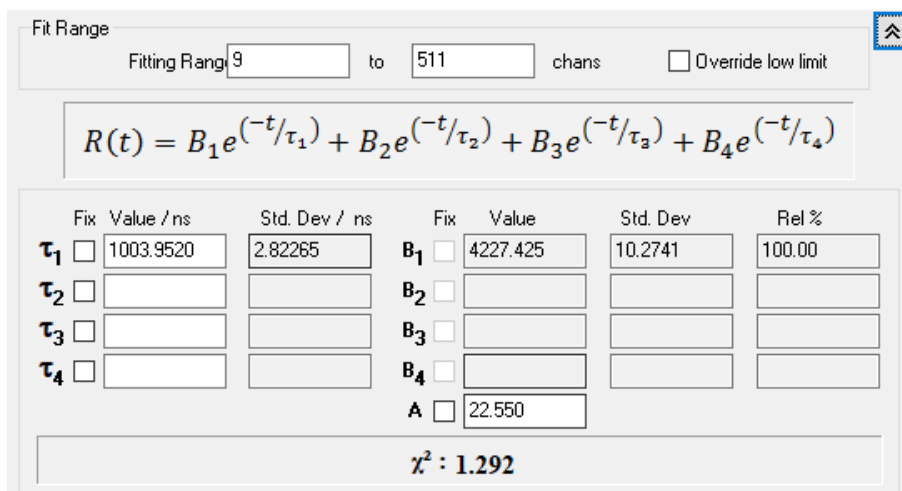

**Figure S47.** Fit result of Ir(III) complex 6,  $\sim 1 \cdot 10^{-6}$  M (Absorbance of 0.100 from UV-Vis) in  $\text{CHCl}_3$  degassed for 20 mins (Ar) at 298 K after excitation at 365 nm. Data collected at  $\lambda_{\text{max}} = 520$  nm.

## Lifetime Measurement of Ir(III) complex 7

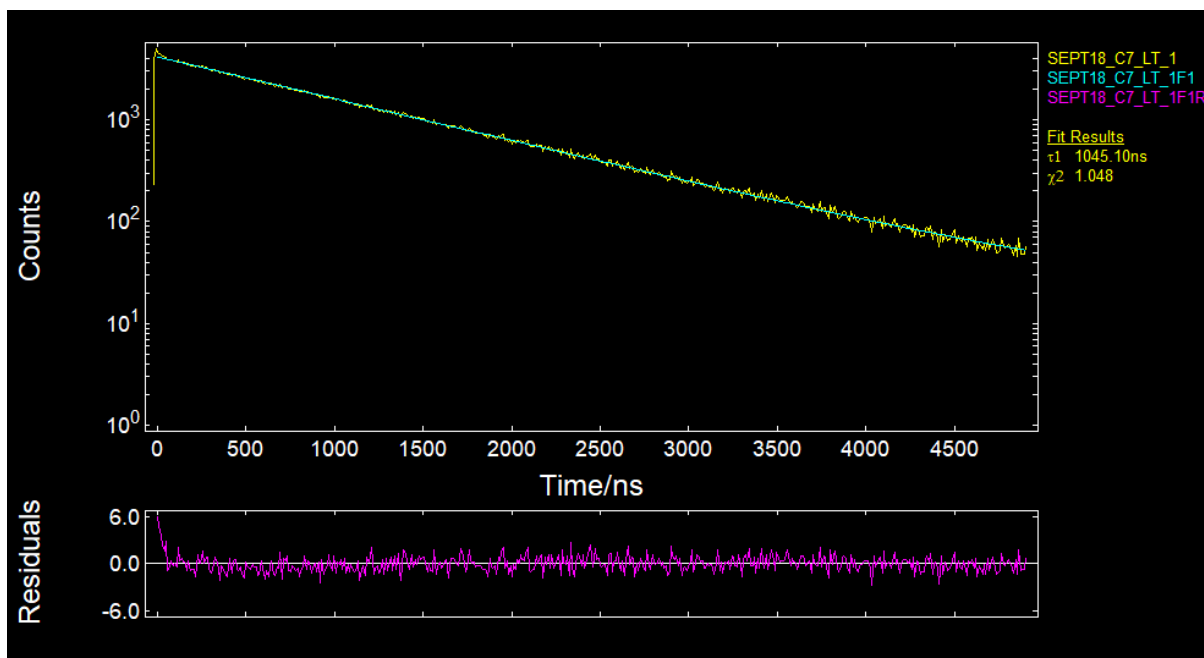

**Figure S48.** Monoexponential lifetime decay of Ir(III) complex **7**,  $\sim 1 \cdot 10^{-6}$  M (Absorbance of 0.094 from UV-Vis) in  $\text{CHCl}_3$  degassed for 20 mins (Ar) at 298 K after excitation at 365 nm. Data collected at  $\lambda_{\text{max}} = 520$  nm.

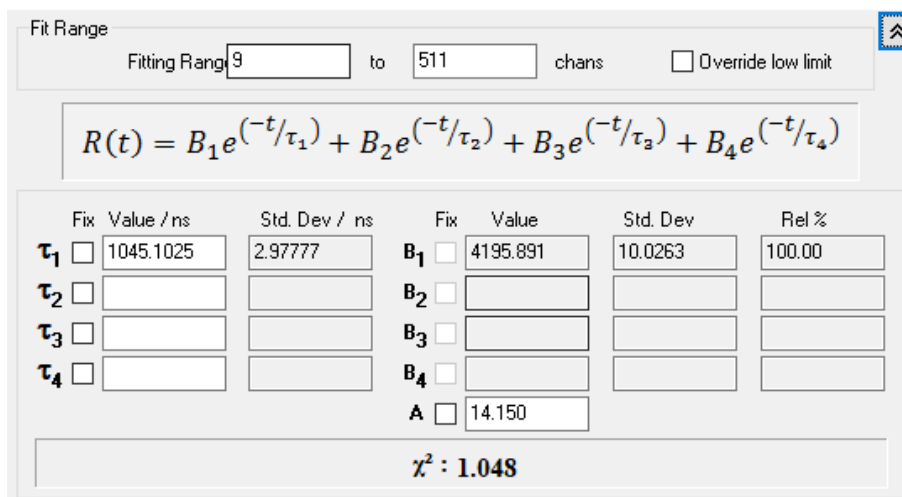

**Figure S49.** Fit result of Ir(III) complex **7**,  $\sim 1 \cdot 10^{-6}$  M (Absorbance of 0.094 from UV-Vis) in  $\text{CHCl}_3$  degassed for 20 mins (Ar) at 298 K after excitation at 365 nm. Data collected at  $\lambda_{\text{max}} = 520$  nm.

## Lifetime Measurement of Ir(III) complex **8**

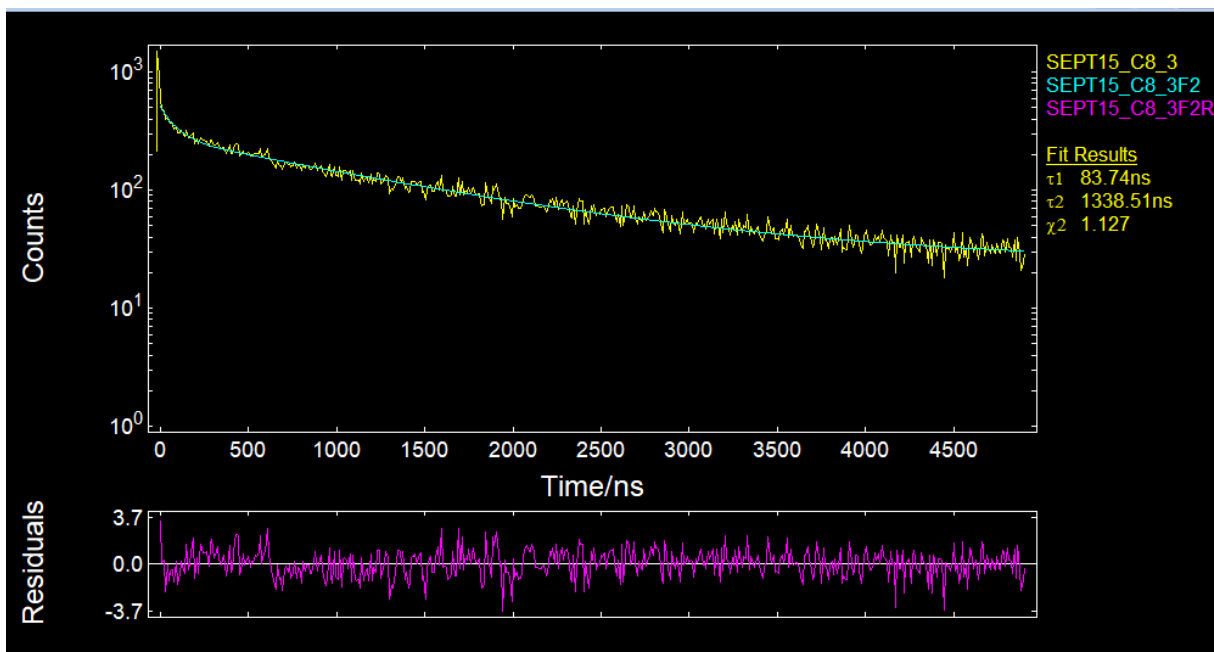

**Figure S50.** Biexponential lifetime decay of Ir(III) complex **8**,  $\sim 1 \cdot 10^{-6}$  M (Absorbance of 0.089 from UV-Vis) in  $\text{CHCl}_3$  degassed for 20 mins (Ar) at 298 K after excitation at 365 nm. Data collected at  $\lambda_{\text{max}} = 520$  nm.

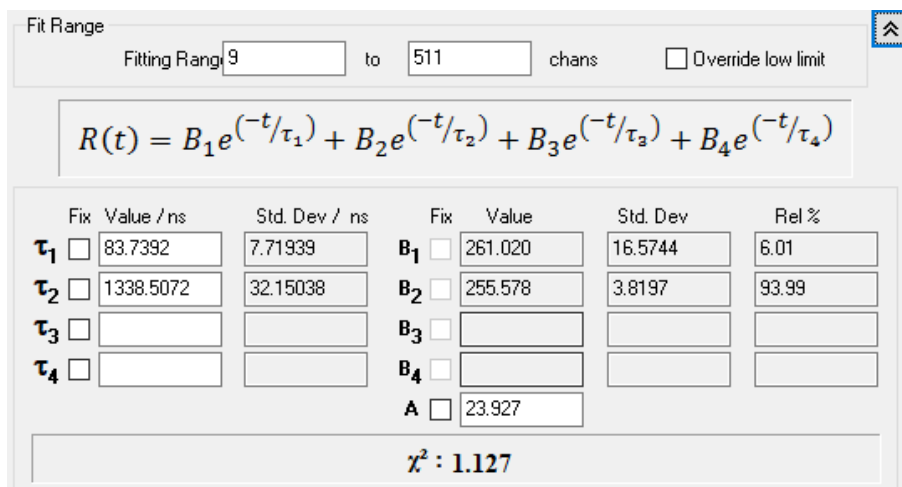

**Figure S51.** Fit result of Ir(III) complex **8**,  $\sim 1 \cdot 10^{-6}$  M (Absorbance of 0.089 from UV-Vis) in  $\text{CHCl}_3$  degassed for 20 mins (Ar) at 298 K after excitation at 365 nm. Data collected at  $\lambda_{\text{max}} = 520$  nm.

## Lifetime Measurement of Ir(III) complex 9

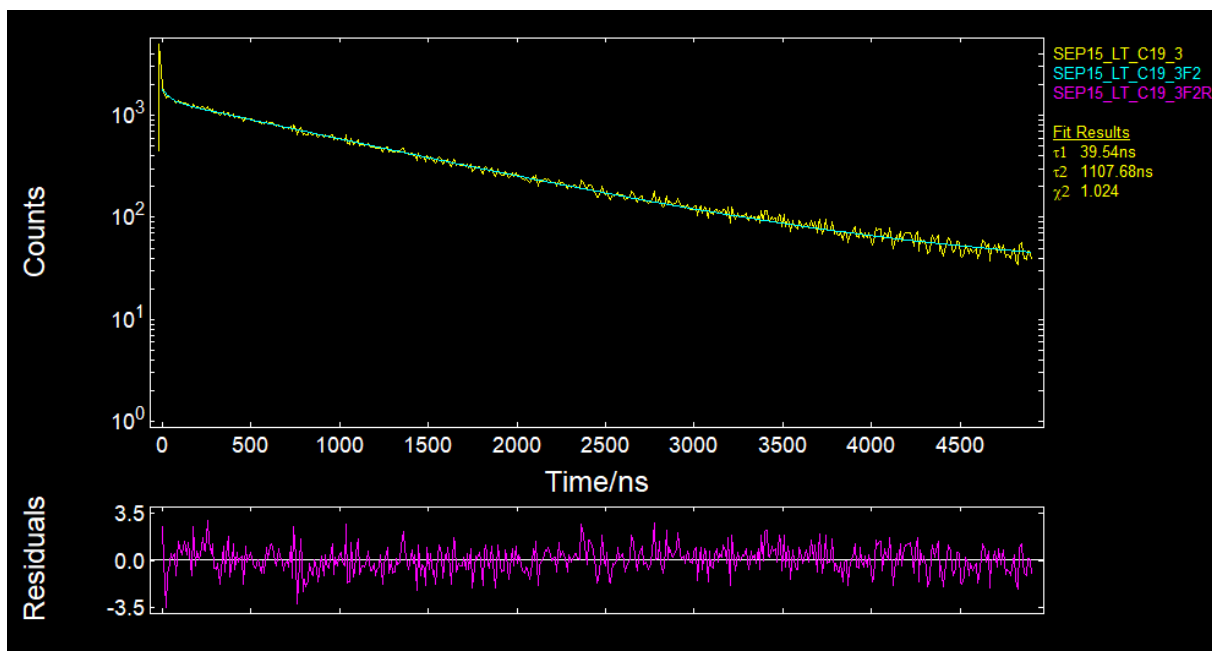

**Figure S52.** Biexponential lifetime decay of Ir(III) complex **9**,  $\sim 1 \cdot 10^{-6}$  M (Absorbance of 0.100 from UV-Vis) in  $\text{CHCl}_3$  degassed for 20 mins (Ar) at 298 K after excitation at 365 nm. Data collected at  $\lambda_{\text{max}} = 520$  nm.

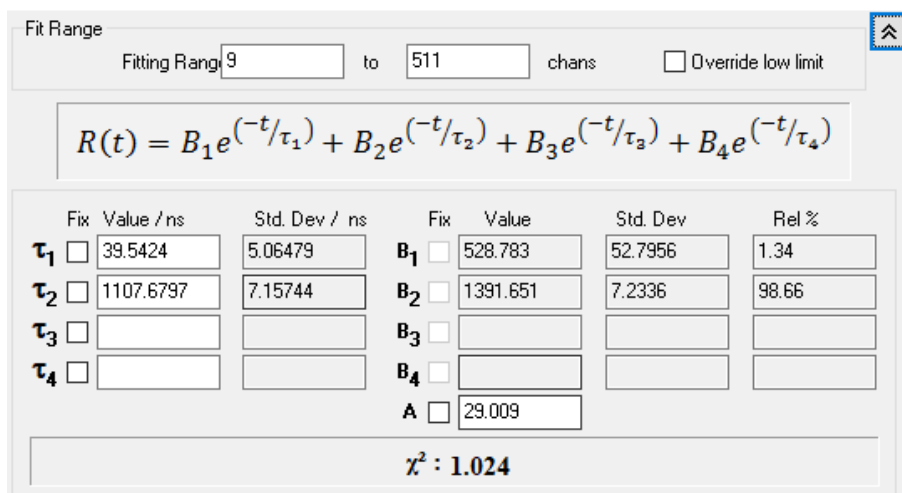

**Figure S53.** Fit result of Ir(III) complex **9**,  $\sim 1 \cdot 10^{-6}$  M (Absorbance of 0.100 from UV-Vis) in  $\text{CHCl}_3$  degassed for 20 mins (Ar) at 298 K after excitation at 365 nm. Data collected at  $\lambda_{\text{max}} = 520$  nm.

## Lifetime Measurement of Ir(III) complex 10

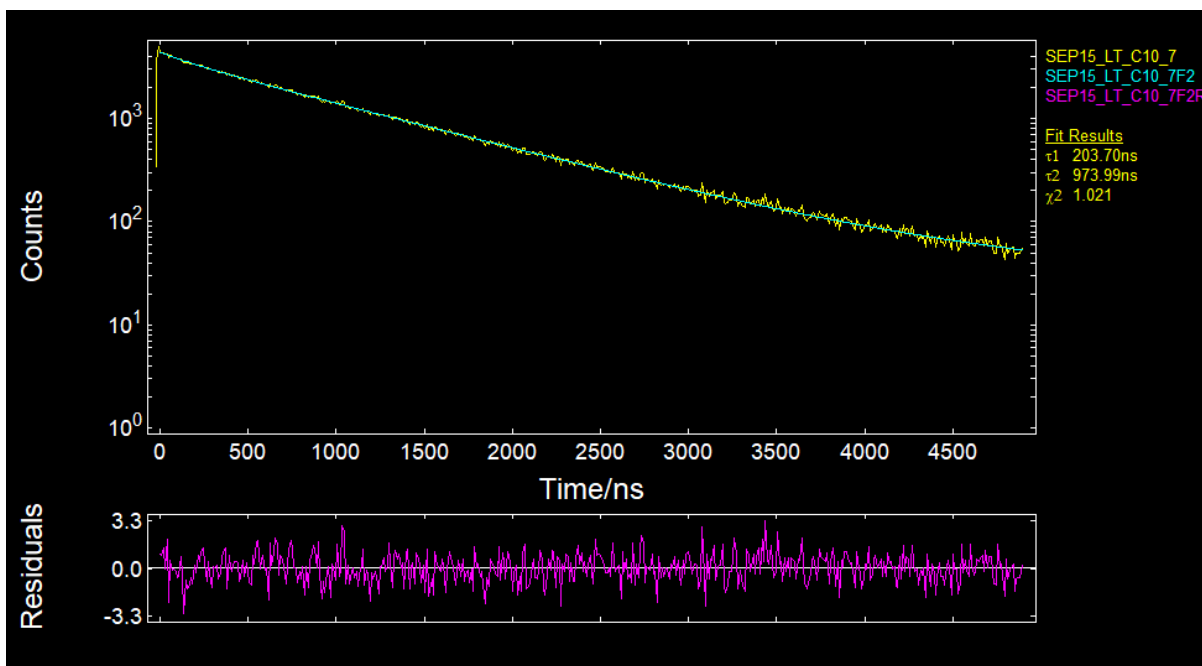

**Figure S54.** Biexponential lifetime decay of Ir(III) complex **10**,  $\sim 1 \cdot 10^{-6}$  M (Absorbance of 0.077 from UV-Vis) in  $\text{CHCl}_3$  degassed for 20 mins (Ar) at 298 K after excitation at 365 nm. Data collected at  $\lambda_{\text{max}} = 520$  nm.

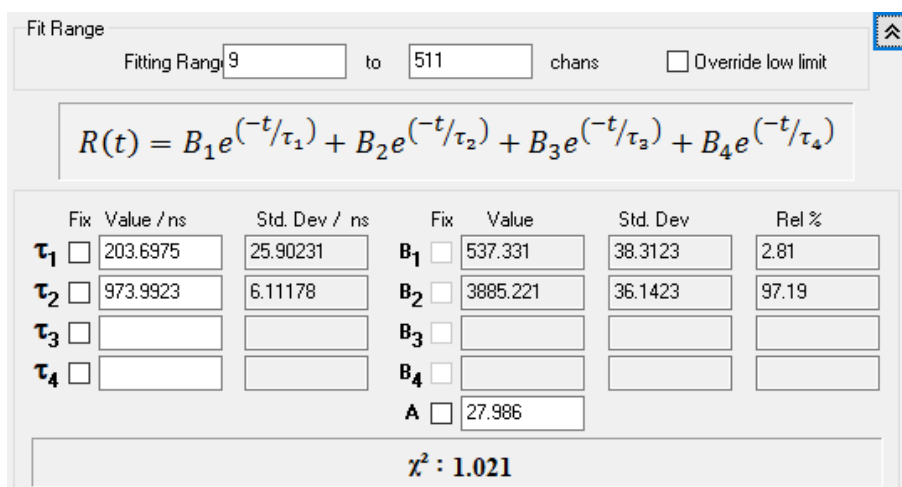

**Figure S55.** Fit result of Ir(III) complex **10**,  $\sim 1 \cdot 10^{-6}$  M (Absorbance of 0.077 from UV-Vis) in  $\text{CHCl}_3$  degassed for 20 mins (Ar) at 298 K after excitation at 365 nm. Data collected at  $\lambda_{\text{max}} = 520$  nm.



## Lifetime Measurement of Ir(III) complex 11

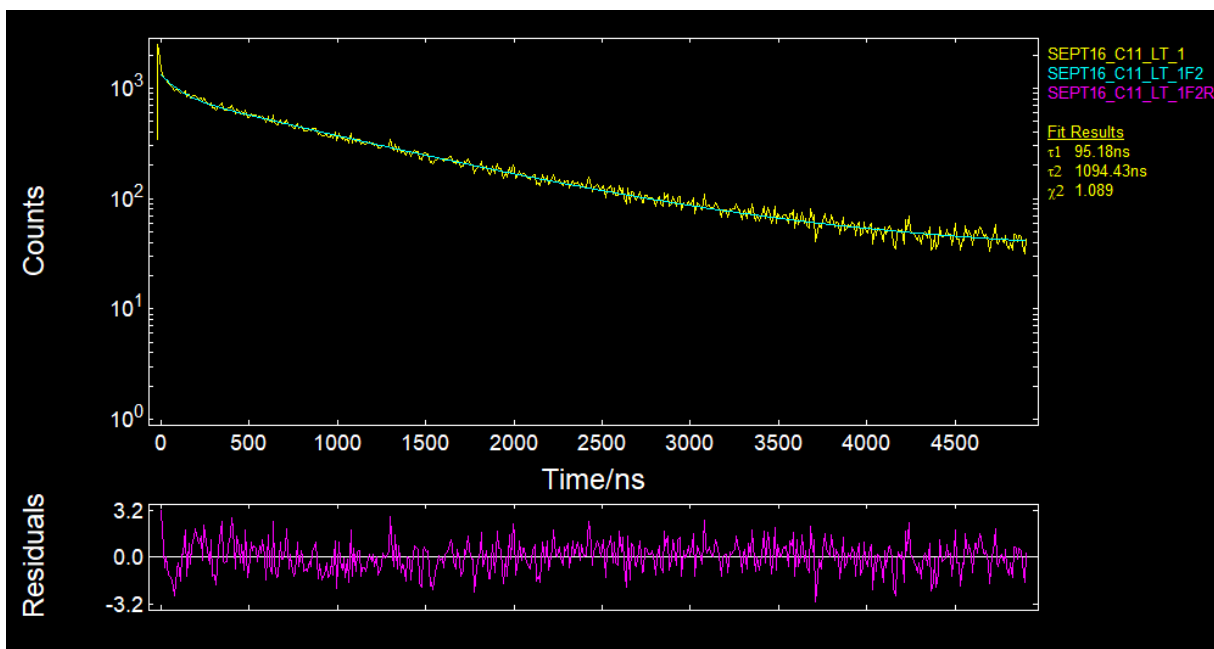

**Figure S56.** Biexponential lifetime decay of Ir(III) complex **11**,  $\sim 1 \cdot 10^{-6}$  M (Absorbance of 0.078 from UV-Vis) in  $\text{CHCl}_3$  degassed for 20 mins (Ar) at 298 K after excitation at 365 nm. Data collected at  $\lambda_{\text{max}} = 520$  nm.

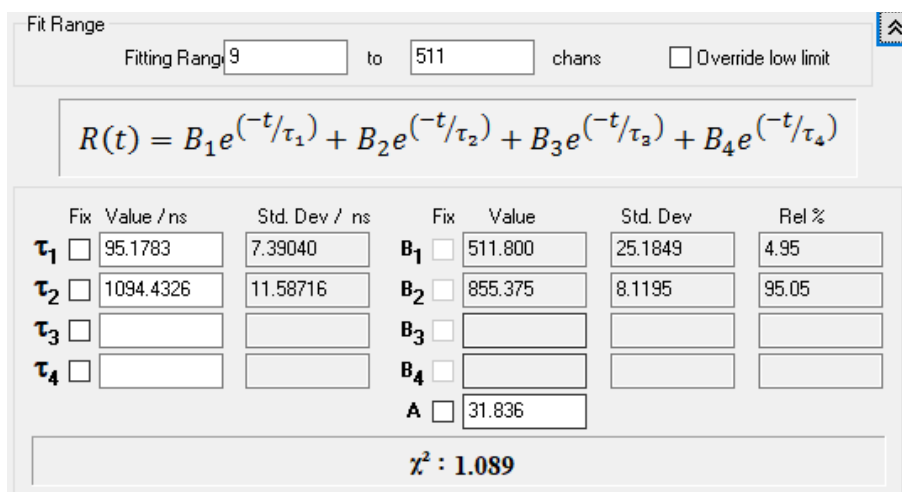

**Figure S57.** Fit result of Ir(III) complex **11**,  $\sim 1 \cdot 10^{-6}$  M (Absorbance of 0.078 from UV-Vis) in  $\text{CHCl}_3$  degassed for 20 mins (Ar) at 298 K after excitation at 365 nm. Data collected at  $\lambda_{\text{max}} = 520$  nm.
